## A multimodal cell census and atlas of the mammalian primary motor cortex

1 **Title: A multimodal cell census and atlas of the mammalian primary motor cortex**

2

3 **Authors: BRAIN Initiative Cell Census Network (BICCN)**

4

5

6 **ABSTRACT**

7

8 We report the generation of a multimodal cell census and atlas of the mammalian primary motor  
9 cortex (MOp or M1) as the initial product of the BRAIN Initiative Cell Census Network  
10 (BICCN). This was achieved by coordinated large-scale analyses of single-cell transcriptomes,  
11 chromatin accessibility, DNA methylomes, spatially resolved single-cell transcriptomes,  
12 morphological and electrophysiological properties, and cellular resolution input-output mapping,  
13 integrated through cross-modal computational analysis. Together, our results advance the  
14 collective knowledge and understanding of brain cell type organization: First, our study reveals a  
15 unified molecular genetic landscape of cortical cell types that congruently integrates their  
16 transcriptome, open chromatin and DNA methylation maps. Second, cross-species analysis  
17 achieves a unified taxonomy of transcriptomic types and their hierarchical organization that are  
18 conserved from mouse to marmoset and human. Third, cross-modal analysis provides compelling  
19 evidence for the epigenomic, transcriptomic, and gene regulatory basis of neuronal phenotypes  
20 such as their physiological and anatomical properties, demonstrating the biological validity and  
21 genomic underpinning of neuron types and subtypes. Fourth, *in situ* single-cell transcriptomics  
22 provides a spatially-resolved cell type atlas of the motor cortex. Fifth, integrated transcriptomic,  
23 epigenomic and anatomical analyses reveal the correspondence between neural circuits and  
24 transcriptomic cell types. We further present an extensive genetic toolset for targeting and fate  
25 mapping glutamatergic projection neuron types toward linking their developmental trajectory to  
26 their circuit function. Together, our results establish a unified and mechanistic framework of  
27 neuronal cell type organization that integrates multi-layered molecular genetic and spatial  
28 information with multi-faceted phenotypic properties.

29

30

31 **INTRODUCTION**

32

33 Unique among body organs, the human brain is a vast network of information processing units,  
34 comprising billions of neurons interconnected through trillions of synapses. Across the brain,  
35 diverse neuronal and non-neuronal cells display a wide range of molecular, anatomical, and  
36 physiological properties that together shape the network dynamics and computations underlying  
37 mental activities and behavior. A remarkable feature of brain networks is their self-assembly  
38 through the developmental process, which leverages genomic information shaped by evolution to  
39 build a set of stereotyped network scaffolds largely identical among individuals of the same  
40 species; life experiences then sculpt neural circuits customized to each individual. An essential

## A multimodal cell census and atlas of the mammalian primary motor cortex

41 step toward understanding the architecture, development, function and neuropsychiatric diseases  
42 of the brain is to discover and map its constituent neuronal elements together with the many  
43 other cell types that comprise the full organ system.

44  
45 The notion of “neuron types”, cells with similar properties as the basic units of brain circuits, has  
46 been an important concept since the discovery of stereotyped neuronal morphology over a  
47 century ago<sup>1,2</sup>. However, a rigorous and quantitative definition of neuron types has remained  
48 surprisingly elusive<sup>3-7</sup>. Neurons are remarkably complex and heterogeneous, both locally and in  
49 their long-range axonal projections that can span the entire brain and connect to many target  
50 regions. Many conventional technologies analyze one neuron at a time, and often study only one  
51 or two cellular phenotypes in an incomplete way (*e.g.* missing axonal arbors in distant targets).  
52 As a result, despite major advances in past decades, until recently phenotypic analyses of neuron  
53 types remained severely limited in resolution, robustness, comprehensiveness, and throughput.  
54 Besides technical challenges, complexities in the relationship among different cellular  
55 phenotypes (multi-modal correspondence) have fueled long-standing debates on how neuron  
56 types should be defined<sup>8</sup>. These debates reflect the lack of a biological framework of cell type  
57 organization for understanding brain architecture and function.

58  
59 In the past decade, single-cell genomics technologies have rapidly swept across many areas of  
60 biology including neuroscience, promising to catalyze a transformation from phenotypic  
61 description and classification to a mechanistic and explanatory molecular genetic framework for  
62 the cellular basis of brain organization<sup>9-12</sup>. These technologies provide unprecedented resolution  
63 and throughput to measure the molecular profiles of individual cells, including the complete sets  
64 of actively transcribed genes (the transcriptome) and genome-wide epigenetic landscape (the  
65 epigenome). Application of single cell RNA-sequencing (scRNA-seq) to the neocortex,  
66 hippocampus, hypothalamus and other brain regions has revealed a complex but tractable  
67 hierarchical organization of transcriptomic cell types that are consistent overall with knowledge  
68 from decades of anatomical, physiological and developmental studies but with an unmatched  
69 level of granularity<sup>13-19</sup>. Similarly, single-cell DNA methylation and chromatin accessibility  
70 studies have begun to reveal cell type-specific genome-wide epigenetic landscapes and gene  
71 regulatory networks in the brain<sup>20-25</sup>. Importantly, the scalability and high information content  
72 of these methods allow comprehensive quantitative analysis and classification of cell types, both  
73 neuronal and non-neuronal, revealing the molecular basis of cellular phenotypes and properties.  
74 Further, these methods are readily applicable to brain tissues across species including humans,  
75 providing a quantitative means for comparative analysis that has revealed compelling  
76 conservation of cellular architecture as well as specialization of cell types across mammalian  
77 species.

78  
79 Other recent technological advances have crossed key thresholds to provide the resolution and  
80 throughput to tackle brain complexity as well, for example for whole-brain neuronal morphology

## A multimodal cell census and atlas of the mammalian primary motor cortex

81 and comprehensive projection mapping<sup>26,27</sup>. Furthermore, powerful new methods, including  
82 imaging-based single-cell transcriptomics, the combination of single-cell transcriptome imaging  
83 and functional imaging, and the integration of electrophysiological recording and single-cell  
84 sequencing, allow mapping of the spatial organization, function, and electrophysiological,  
85 morphological and connectional properties of molecularly defined cell types<sup>28-32</sup>. Finally, the  
86 molecular classification of cell types allows the generation of models for genetic access to  
87 specific cell types using transgenic mice and, more recently, short enhancer sequences<sup>33-39</sup>. All  
88 of these methods have been applied to brain tissues in independent studies, but not yet in a  
89 coordinated fashion to establish how different modalities correspond with one another, and how  
90 explanatory a molecular genetic framework is for other functionally important cellular  
91 phenotypes.

92  
93 Recognizing the unprecedented opportunity to tackle brain complexity brought by these  
94 technological advances, the overarching goal of the BRAIN Initiative Cell Census Network  
95 (BICCN) is to generate an open-access reference brain cell atlas that integrates molecular,  
96 spatial, morphological, connectional, and functional data for describing cell types in mouse,  
97 human, and non-human primate brains<sup>40</sup>. A key concept is the Brain Cell Census, similar  
98 conceptually to a population census, which accounts for the population of constituent neuronal  
99 and non-neuronal cell types, along with their spatial locations and defining phenotypic  
100 characteristics that can be aggregated as cellular populations that make up each brain region.  
101 This cell type classification scheme, organized as a taxonomy, should aim for a consensus across  
102 modalities and across mammalian species (for conserved types). Beyond the cell census, a Brain  
103 Cell Atlas would be embedded in a 3D Common Coordinate Framework (CCF) of the brain<sup>41</sup>, in  
104 which the precise location and distribution of all cell types and their multi-modal features are  
105 registered and displayed. Such a cell-type resolution spatial framework will greatly facilitate  
106 integration, interpretation and navigation of various types of information for understanding brain  
107 network organization and function.

108  
109 Here we present the cell census and atlas of cell types in one region of the mammalian brain, the  
110 primary motor cortex (MOp or M1) of mouse, marmoset and human, through an analysis with  
111 unprecedented scope, depth and range of approaches (**Fig. 1, Table 1**). MOp is important in the  
112 control of complex movement and is well conserved across species. Decades of accumulated  
113 anatomical, physiological, and functional studies have provided a rich knowledge base for the  
114 integration and interpretation of cell type information in MOp<sup>42,43</sup>. This manuscript describes a  
115 synthesis of results and findings derived from eleven core companion papers through a multi-  
116 laboratory coordinated data generation within BICCN. We derive a cross-species consensus  
117 transcriptomic taxonomy of cell types and identify conserved and divergent gene expression and  
118 epigenomic regulatory signatures from a large and comprehensive set of single-cell/nucleus  
119 RNA-sequencing, DNA methylation and chromatin accessibility data. Focusing on mouse MOp,  
120 we map the spatial organization of transcriptomic cell types by multiplexed error-robust

## A multimodal cell census and atlas of the mammalian primary motor cortex

121 fluorescence in situ hybridization (MERFISH) and their laminar, morphological and  
 122 electrophysiological properties by Patch-seq; we report the cell-type resolution input-output  
 123 wiring diagram of this region by anterograde and retrograde tracing and investigate how axon  
 124 projection patterns of glutamatergic excitatory neurons correlate with molecularly-defined cell  
 125 types by Epi-Retro-Seq, Retro-MERFISH (the combination of MERFISH and retrograde  
 126 labeling), and single-neuron full morphology reconstruction; we describe transgenic driver lines  
 127 systematically targeting glutamatergic cell types based on marker genes and lineages. Finally, we  
 128 integrate this vastly diverse array of information into a cohesive depiction of cell types in the  
 129 MOp region with correlated molecular genetic, spatial, morphological, connectional, and  
 130 physiological properties and relating them to traditionally described cell types. Such integration  
 131 is illustrated in detail in example cell types with unique features in MOp: the layer 4  
 132 intratelencephalic-projecting (L4 IT) cells and layer 5 extratelencephalic-projecting (L5 ET)  
 133 cells. This multitude of datasets are organized by the BRAIN Cell Data Center (BCDC) and  
 134 made public through the BICCN web portal [www.biccn.org](http://www.biccn.org). Key concepts and terms are  
 135 described in **Table 2**, including anatomical terms for input and output brain regions for MOp,  
 136 and hierarchical cell class, subclass and type definitions.

137

138 **Table 1. Experimental and computational techniques used in this study and associated**  
 139 **datasets**

| Feature              | Experimental or analytic technique(s) | Abbreviations                                   | References                                                     | Samples (e.g. # of cells or nuclei) in MOp/M1                                                                                                                                                                  | Total samples in flagship and companion papers |
|----------------------|---------------------------------------|-------------------------------------------------|----------------------------------------------------------------|----------------------------------------------------------------------------------------------------------------------------------------------------------------------------------------------------------------|------------------------------------------------|
| <b>Transcription</b> | Single-cell mRNA sequencing           | scRNA-Seq:<br>SMART-Seq v4, 10x Chromium v2, v3 | Background: <sup>15,44</sup><br>Companion: <sup>45</sup>       | <b>SMART-seq v4:</b><br>6,288 cells (mouse)<br><b>10x Chromium v2, v3:</b><br>193,824 cells (mouse)                                                                                                            | 1,163,727 cells                                |
|                      | Single nucleus mRNA sequencing        | snRNA-Seq:<br>SMART-Seq v4, 10x Chromium v2, v3 | Background: <sup>18,46,47</sup><br>Companion: <sup>45,48</sup> | <b>SMART-seq v4:</b><br>6,171 nuclei (mouse)<br>10,534 nuclei (human)<br><b>10x Chromium v2, v3:</b><br>294,717 nuclei (mouse)<br>69,279 nuclei (marmoset)<br>15,842 nuclei (macaque)<br>76,533 nuclei (human) | 1,100,168 nuclei                               |

## A multimodal cell census and atlas of the mammalian primary motor cortex

|                                                       |                                                                                 |                                                      |                                                                   |                                                                         |                                                             |
|-------------------------------------------------------|---------------------------------------------------------------------------------|------------------------------------------------------|-------------------------------------------------------------------|-------------------------------------------------------------------------|-------------------------------------------------------------|
| <b>DNA methylation</b>                                | Single-nucleus methylcytosine sequencing 2                                      | snmC-Seq2                                            | Background: <sup>49</sup><br>Companion: <sup>45,48,50</sup>       | 9,941 nuclei (mouse)<br>5,324 nuclei (marmoset)<br>5,222 nuclei (human) | 110,294 nuclei                                              |
| <b>Open chromatin</b>                                 | Single nucleus Assay for Transposase-Accessible Chromatin                       | snATAC-Seq                                           | Background: <sup>21,51</sup><br>Companion: <sup>45,52</sup>       | 79,625 nuclei (mouse)                                                   | 813,799 nuclei                                              |
| <b>Combined transcription/ Open chromatin</b>         | Single-nucleus chromatin accessibility and mRNA expression sequencing           | SNARE-seq2                                           | Background: <sup>53</sup><br>Companion: <sup>48</sup>             | 9,946 nuclei (marmoset)<br>84,178 nuclei (human)                        | 94,124 nuclei                                               |
| <b>Spatially resolved single-cell transcriptomics</b> | Multiplexed error-robust fluorescence in situ hybridization                     | MERFISH                                              | Background: <sup>28,29</sup><br>Companion: <sup>54</sup>          | ~300,000 cells (mouse)                                                  | ~300,000 cells                                              |
| <b>Clustering and data integration methods</b>        | Clustering - Hierarchical iterative clustering                                  | scrattch.hicat                                       | Background: <sup>15,44</sup><br>Companion: <sup>45,48</sup>       |                                                                         |                                                             |
|                                                       | Clustering - Metacell hierarchical clustering with dynamic tree pruning         | tree-based method                                    | Companion: <sup>48</sup>                                          |                                                                         |                                                             |
|                                                       | Clustering of snATAC-seq data                                                   | SnapATAC                                             | Background: <sup>55</sup><br>Companion: <sup>52</sup>             |                                                                         |                                                             |
|                                                       | Clustering - Leiden clustering                                                  |                                                      | Background: <sup>56</sup><br>Companion: <sup>48</sup>             |                                                                         |                                                             |
|                                                       | Multimodality and cross-species integration                                     | LIGER, Seurat, SingleCellFusion (SCF),scrattch.hicat | Background: <sup>44,47,57-60</sup><br>Companion: <sup>45,48</sup> |                                                                         |                                                             |
| <b>Statistical validation</b>                         | Cross-dataset replicability analysis                                            | MetaNeighbor                                         | Background: <sup>61</sup><br>Companion: <sup>45,48</sup>          |                                                                         |                                                             |
| <b>Electrophysiology, cellular morphology and</b>     | Combined in vitro slice physiology, biocytin cell filling, cytoplasm extraction | Patch-Seq, Smart-seq v2                              | Background: <sup>30,62,63</sup><br>Companion: <sup>48,64,65</sup> | 1,237 cells (mouse)<br>6 cells (macaque)<br>6 cells (human)             | 133 cells (mouse)<br>6 cells (macaque)<br>391 cells (human) |

## A multimodal cell census and atlas of the mammalian primary motor cortex

|                                           |                                                                                                    |                                                                       |                                                                                                             |                                            |                               |
|-------------------------------------------|----------------------------------------------------------------------------------------------------|-----------------------------------------------------------------------|-------------------------------------------------------------------------------------------------------------|--------------------------------------------|-------------------------------|
| <b>transcriptomics</b>                    | and RNA-sequencing                                                                                 |                                                                       |                                                                                                             |                                            |                               |
| <b>Cellular morphology and projection</b> | Whole brain single cell full morphology reconstructions                                            | fMOST, MouseLight                                                     |                                                                                                             | 151 cells (full morphology)                | 1,708 cells (full morphology) |
|                                           | Barcoded anatomy resolved by sequencing                                                            | BARseq                                                                | Background: <sup>26,66,67</sup><br>Companion: <sup>68,69</sup>                                              |                                            | 10,299 neurons (BARseq)       |
| <b>Inter-areal circuit mapping</b>        | Anterograde tracing: PHAL, Viral tracers: AAV, Cre-dependent AAV, monosynaptic anterograde AAV-Cre | AAV, PHAL                                                             | Background: <sup>70-74</sup><br>Companion: <sup>69,75</sup>                                                 | 22 experiments (mouse)                     |                               |
|                                           | Retrograde tracing: CTB, viral tracers                                                             | RV, rabies, TRIO                                                      | Background: <sup>70,76-78</sup><br>Companion: <sup>69,75</sup>                                              | 40 experiments (mouse)                     |                               |
| <b>Projection-specific profiling</b>      | Retrograde viral labeling of neurons with defined projections followed by epigenome profiling      | Epi-Retro-Seq                                                         |                                                                                                             | 2,111 cells (mouse)                        | 11,827 cells                  |
|                                           | Combined retrograde labeling and MERFISH                                                           | Retro-MERFISH                                                         | Companion: <sup>54,79</sup>                                                                                 |                                            |                               |
| <b>Genetic tools</b>                      | Transgenic mouse lines                                                                             | FlpO, Cre, CreER knockin lines; TIGRE-MORF/Ai166, MORF3 reporter line | Background: <sup>80</sup><br>Companion: <sup>68,75</sup><br>Stafford, Daigle, Chance et al., in preparation | 6 knock-in driver lines<br>1 reporter line | 26 knock-in lines             |

140

141

**Table 2. Glossary**

| Glossary                                 |                            |                                                                      | Definition                                             | InterLex Identifiers                                                |
|------------------------------------------|----------------------------|----------------------------------------------------------------------|--------------------------------------------------------|---------------------------------------------------------------------|
| <b>Neuroanatomical regions described</b> |                            |                                                                      |                                                        |                                                                     |
|                                          | MOp (mouse), M1 (human and | Primary motor cortex, the main target of cellular diversity analyses | Primary motor cortex as defined in Fig 1 of the paper. | <a href="https://doi.org/10.1101/2020.10.19.343129">ILX:0770115</a> |

## A multimodal cell census and atlas of the mammalian primary motor cortex

|                                                                                              |                                                                                                                                                            |                                        |                                                                                                                                                                                                                                                                                                                                                                                                                                                                                                                                                                                                                                                                                                                                                     |                                                                                                                                                                                                                                                                                                                    |
|----------------------------------------------------------------------------------------------|------------------------------------------------------------------------------------------------------------------------------------------------------------|----------------------------------------|-----------------------------------------------------------------------------------------------------------------------------------------------------------------------------------------------------------------------------------------------------------------------------------------------------------------------------------------------------------------------------------------------------------------------------------------------------------------------------------------------------------------------------------------------------------------------------------------------------------------------------------------------------------------------------------------------------------------------------------------------------|--------------------------------------------------------------------------------------------------------------------------------------------------------------------------------------------------------------------------------------------------------------------------------------------------------------------|
|                                                                                              | non-human primate)                                                                                                                                         |                                        |                                                                                                                                                                                                                                                                                                                                                                                                                                                                                                                                                                                                                                                                                                                                                     |                                                                                                                                                                                                                                                                                                                    |
|                                                                                              | L1, L2/3, L4, L5, L6, L6b                                                                                                                                  | Layers within MOp                      | Cortical layers in primary motor cortex                                                                                                                                                                                                                                                                                                                                                                                                                                                                                                                                                                                                                                                                                                             | <a href="#">ILX:0770170</a><br><a href="#">ILX:0770171</a><br><a href="#">ILX:0770172</a><br><a href="#">ILX:0770173</a><br><a href="#">ILX:0770179</a><br><a href="#">ILX:0770180</a>                                                                                                                             |
| Brain regions receiving axonal projections from MOp targeted for retrograde labeling studies |                                                                                                                                                            |                                        |                                                                                                                                                                                                                                                                                                                                                                                                                                                                                                                                                                                                                                                                                                                                                     | <a href="#">ILX:0770177</a>                                                                                                                                                                                                                                                                                        |
| Cortical                                                                                     | SSp (Primary somatosensory cortex), MOs (Secondary motor cortex), TEa (Temporal association area), ACA (Anterior cingulate area)                           |                                        | Subset of cortical regions that receive axonal projections from primary motor cortex that were targeted in BICCN retrograde labeling studies.                                                                                                                                                                                                                                                                                                                                                                                                                                                                                                                                                                                                       | <a href="#">ILX:0770178</a><br><a href="#">ILX:0770117</a><br><a href="#">ILX:0770116</a><br><a href="#">ILX:0770118</a><br><a href="#">ILX:0770120</a>                                                                                                                                                            |
| Subcortical                                                                                  | STR (Striatum), TH (Thalamus), SC (Superior colliculus), VTA (Ventral tegmental area), HY (Hypothalamus), MB (Midbrain), P (Pons), MY (Medulla), claustrum |                                        | Subset of subcortical regions that receive axonal projections from primary motor cortex that were targeted in BICCN retrograde labeling studies.                                                                                                                                                                                                                                                                                                                                                                                                                                                                                                                                                                                                    | <a href="#">ILX:0770167</a><br><a href="#">ILX:0770122</a><br><a href="#">ILX:0770123</a><br><a href="#">ILX:0770124</a><br><a href="#">ILX:0770137</a><br><a href="#">ILX:0770165</a><br><a href="#">ILX:0770126</a><br><a href="#">ILX:0770127</a><br><a href="#">ILX:0770125</a><br><a href="#">ILX:0770128</a> |
| Germinal sources of cortical GABAergic neurons                                               |                                                                                                                                                            |                                        |                                                                                                                                                                                                                                                                                                                                                                                                                                                                                                                                                                                                                                                                                                                                                     |                                                                                                                                                                                                                                                                                                                    |
|                                                                                              | MGE, CGE                                                                                                                                                   | Medial and caudal ganglionic eminences | The MGE is a progenitor domain within the ventral telencephalon that, together with the lateral ganglionic eminence (LGE), are the source of the majority of interneurons in the neocortex, hippocampus and olfactory bulb. In addition, oligodendrocytes arise from these regions and migrate into the developing cortex. The CGE is a progenitor domain within the ventral telencephalon that is a source of cortical interneurons in the striatum, neocortex and limbic system. The CGE is defined as a posterior region in which the medial and lateral eminences are fused to one structure. This structure is also a source of oligodendrocytes. Adapted from <a href="https://discovery.lifemapsc.com">https://discovery.lifemapsc.com</a> . | <a href="#">ILX:0770129</a><br><a href="#">ILX:0770130</a>                                                                                                                                                                                                                                                         |
|                                                                                              |                                                                                                                                                            |                                        |                                                                                                                                                                                                                                                                                                                                                                                                                                                                                                                                                                                                                                                                                                                                                     |                                                                                                                                                                                                                                                                                                                    |

## A multimodal cell census and atlas of the mammalian primary motor cortex

| Definition of terms used to describe cellular hierarchy                                                |            |                                                           |                                                                                                                                                                                                                                                                               |                                                                                                                                                                                                                                                                                     |
|--------------------------------------------------------------------------------------------------------|------------|-----------------------------------------------------------|-------------------------------------------------------------------------------------------------------------------------------------------------------------------------------------------------------------------------------------------------------------------------------|-------------------------------------------------------------------------------------------------------------------------------------------------------------------------------------------------------------------------------------------------------------------------------------|
| Cell class: Top branches of hierarchical tree                                                          |            |                                                           | The top branches of the CN transcriptomic cell type hierarchy comprising neuronal and non-neuronal cells. Neuronal cells comprise inhibitory GABAergic cortical neurons and excitatory glutamatergic cortical neurons. Non-neuronal cells comprise glia and non-neural cells. | <a href="#">ILX:0770094</a>                                                                                                                                                                                                                                                         |
| Neuronal                                                                                               | Inh        | GABAergic or inhibitory neurons, derived from MGE and CGE | Neuronal cell with a soma located in the cortex that uses GABA as a neurotransmitter and which exerts an inhibitory post-synaptic effect and derived from MGE and CGE.                                                                                                        | <a href="#">ILX:0770098</a>                                                                                                                                                                                                                                                         |
|                                                                                                        | Exc        | Glutamatergic or excitatory neurons                       | Neuronal cell with a soma located in the cortex that uses glutamate as a neurotransmitter and exerts an excitatory post-synaptic effect.                                                                                                                                      | <a href="#">ILX:0770097</a>                                                                                                                                                                                                                                                         |
| Non-neuronal                                                                                           | Glia       | Non-neuronal cells of neuroectoderm origin                | Non-neuronal brain cells of neuroectoderm origin                                                                                                                                                                                                                              | <a href="#">ILX:0770169</a>                                                                                                                                                                                                                                                         |
|                                                                                                        | Non-neural | Cells of mesoderm, neural crest or yolk sac origin        | Non-neuronal brain cells of mesoderm, neural crest or yolk sac origin                                                                                                                                                                                                         | <a href="#">ILX:0770187</a>                                                                                                                                                                                                                                                         |
| Cell subclass: Subset of class, major groupings with highly convergent evidence across data modalities |            |                                                           | Subset of class, major groupings with highly convergent evidence across data modalities                                                                                                                                                                                       | <a href="#">ILX:0770095</a>                                                                                                                                                                                                                                                         |
| GABAergic subclasses (Lamp5, Sncg, Vip, Sst, Sst Chodl, Pvalb, and Meis2)                              |            |                                                           | Subclasses of GABAergic neurons distinguished by one or more marker genes                                                                                                                                                                                                     | <a href="#">ILX:0770149</a><br><a href="#">ILX:0770150</a><br><a href="#">ILX:0770151</a><br><a href="#">ILX:0770152</a><br><a href="#">ILX:0770153</a><br><a href="#">ILX:0770154</a><br><a href="#">ILX:0770155</a>                                                               |
| Glutamatergic subclasses (L2/3 IT, L4/5 IT, L5 IT, L6 IT, L6 IT Car3, L5 ET, L5/6 NP, L6 CT, L6b)      |            |                                                           | Subclasses of glutamatergic neurons distinguished by anatomical location and projection pattern.                                                                                                                                                                              | <a href="#">ILX:0770156</a><br><a href="#">ILX:0770174</a><br><a href="#">ILX:0770157</a><br><a href="#">ILX:0770158</a><br><a href="#">ILX:0770159</a><br><a href="#">ILX:0770160</a><br><a href="#">ILX:0770161</a><br><a href="#">ILX:0770162</a><br><a href="#">ILX:0770163</a> |
| IT: Intratelencephalic projecting                                                                      |            |                                                           | Excitatory glutamatergic neuron that projects to other telencephalic structures.                                                                                                                                                                                              | <a href="#">ILX:0770100</a>                                                                                                                                                                                                                                                         |
| ET: Extratelencephalic projecting                                                                      |            |                                                           | Excitatory glutamatergic neuron that projects to structures not derived from telencephalon                                                                                                                                                                                    | <a href="#">ILX:0770101</a>                                                                                                                                                                                                                                                         |



## A multimodal cell census and atlas of the mammalian primary motor cortex

|  |  |                                                                                                                                                |                                                                                                                                                                                                             |                                                                                                                                                                                        |
|--|--|------------------------------------------------------------------------------------------------------------------------------------------------|-------------------------------------------------------------------------------------------------------------------------------------------------------------------------------------------------------------|----------------------------------------------------------------------------------------------------------------------------------------------------------------------------------------|
|  |  | NP: Near-projecting                                                                                                                            | Excitatory glutamatergic neuron that projects axons locally rather than long distance                                                                                                                       | <a href="#">ILX:0770103</a>                                                                                                                                                            |
|  |  | CT: Corticothalamic projecting                                                                                                                 | Excitatory glutamatergic neurons that project to the thalamus                                                                                                                                               | <a href="#">ILX:0770102</a>                                                                                                                                                            |
|  |  | Glial subclasses (Astro, Oligo, OPC)                                                                                                           | Subclasses of glial cells including astrocytes (Astro), oligodendrocytes (Oligo) and OPC cells (OPC)                                                                                                        | <a href="#">ILX:0770141</a><br><a href="#">ILX:0770140</a><br><a href="#">ILX:0770139</a>                                                                                              |
|  |  | Non-neural subclasses (Endo, VLMC, SMC, Peri, Micro, PVM)                                                                                      | Subclasses of non-neural cells including endothelial cells (Endo), vascular leptomenigeal cells (VLMC), smooth muscle cells (SMC), pericytes (Peri), microglia (Micro) and perivascular myeloid cells (PVM) | <a href="#">ILX:0770142</a><br><a href="#">ILX:0770143</a><br><a href="#">ILX:0770144</a><br><a href="#">ILX:0770145</a><br><a href="#">ILX:0770146</a><br><a href="#">ILX:0770147</a> |
|  |  | Cell type: Subset of subclass, finest resolution clustering achieved for a modality or a consensus clustering across modalities and/or species | Subset of subclass, finest resolution clustering achieved for a modality or a consensus clustering across modalities and/or species                                                                         | <a href="#">ILX:0770096</a>                                                                                                                                                            |
|  |  | Cluster: Data-driven cell set, synonymous with type                                                                                            | Data-driven cell set, synonymous with type                                                                                                                                                                  | <a href="#">ILX:0770164</a>                                                                                                                                                            |

142

143

Major findings from this coordinated consortium project include:

144

- Combined single-cell transcriptomic and epigenomic analysis reveals a unified molecular genetic landscape of adult cortical cell types that integrates gene expression, chromatin state and DNA methylation maps.

145

146

147

- Combination of single-cell -omics, MERFISH-based spatially resolved single-cell transcriptomics and Patch-seq generates a census and atlas of cell types, including their population demographics of type, proportion, and spatial distribution across cortical layers and sublayers.

148

149

150

- Comparative analysis of mouse, marmoset and human transcriptomic types achieves a unified cross-species taxonomy of cortical cell types with their hierarchical organization that reflects developmental origins; transcriptional similarity of cell type granularity across species varies as a function of evolutionary distance.

151

152

153

154

- We observed both highly conserved gene expression and epigenomic signatures of cell identity across species, as well as a large set of species-specific cell type gene expression profiles suggesting a high degree of evolutionary specialization.

155

156

157

- The overall correspondence among transcriptomic, epigenetic, spatial transcriptomic, morphological, and intrinsic physiological datasets reinforces the transcriptomic classification of neuronal subclasses and distinctive types, demonstrating their biological validity and genomic underpinnings, and also reveals continuously varying properties along these axes among some neuronal subclasses and types.

158

159

160

161

162

- Multi-faceted anatomic studies yield a cellular resolution wiring diagram of mouse MOp anchored on major transcriptome-defined projection types, including input-output

163

164

## A multimodal cell census and atlas of the mammalian primary motor cortex

- 165 connectivity at subpopulation level and output pathways at genetically-defined single-cell  
166 level.
- 167 ● The long-range axon projection patterns of individual glutamatergic excitatory neurons  
168 exhibit a complex and diverse range of relationships (between one-to-one and many-to-  
169 many) with transcriptomic and epigenetic types, suggesting another level of regulation in  
170 defining single-cell connectional specificity.
  - 171 ● Cell type transcriptional and epigenetic signatures can guide the generation of an  
172 extensive genetic toolkit for targeting glutamatergic pyramidal neuron types and fate  
173 mapping their progenitor types.
  - 174 ● Multi-site coordination within BICCN and data archives allows a high degree of  
175 standardization, computational integration, and creation of open data resources for  
176 community dissemination of data, tools and knowledge.

177  
178  
179 **Figure 1. Summary of experimental and computational approaches taken as well as**  
180 **community resources generated by the BICCN. a**, Comprehensive characterization of cell  
181 types in the primary motor cortex (MOp) of three mammalian species using multiple approaches  
182 spanning molecular, genetic, physiological and anatomical domains. Integration of these datasets  
183 leads to a cohesive multimodal description of cell types in the mouse MOp and a cross-species  
184 molecular taxonomy of MOp cell types. **b**, The multimodal datasets are organized by the Brain  
185 Cell Data Center (BCDC), archived in the Neuroscience Multi-omic (NeMO) Archive (for  
186 molecular datasets), Brain Image Library (BIL, for imaging datasets) and Distributed Archive for  
187 Neurophysiology Data Integration (DANDI, for electrophysiology data), and made publicly  
188 available through the BICCN web portal [www.biccn.org](http://www.biccn.org).

189  
190

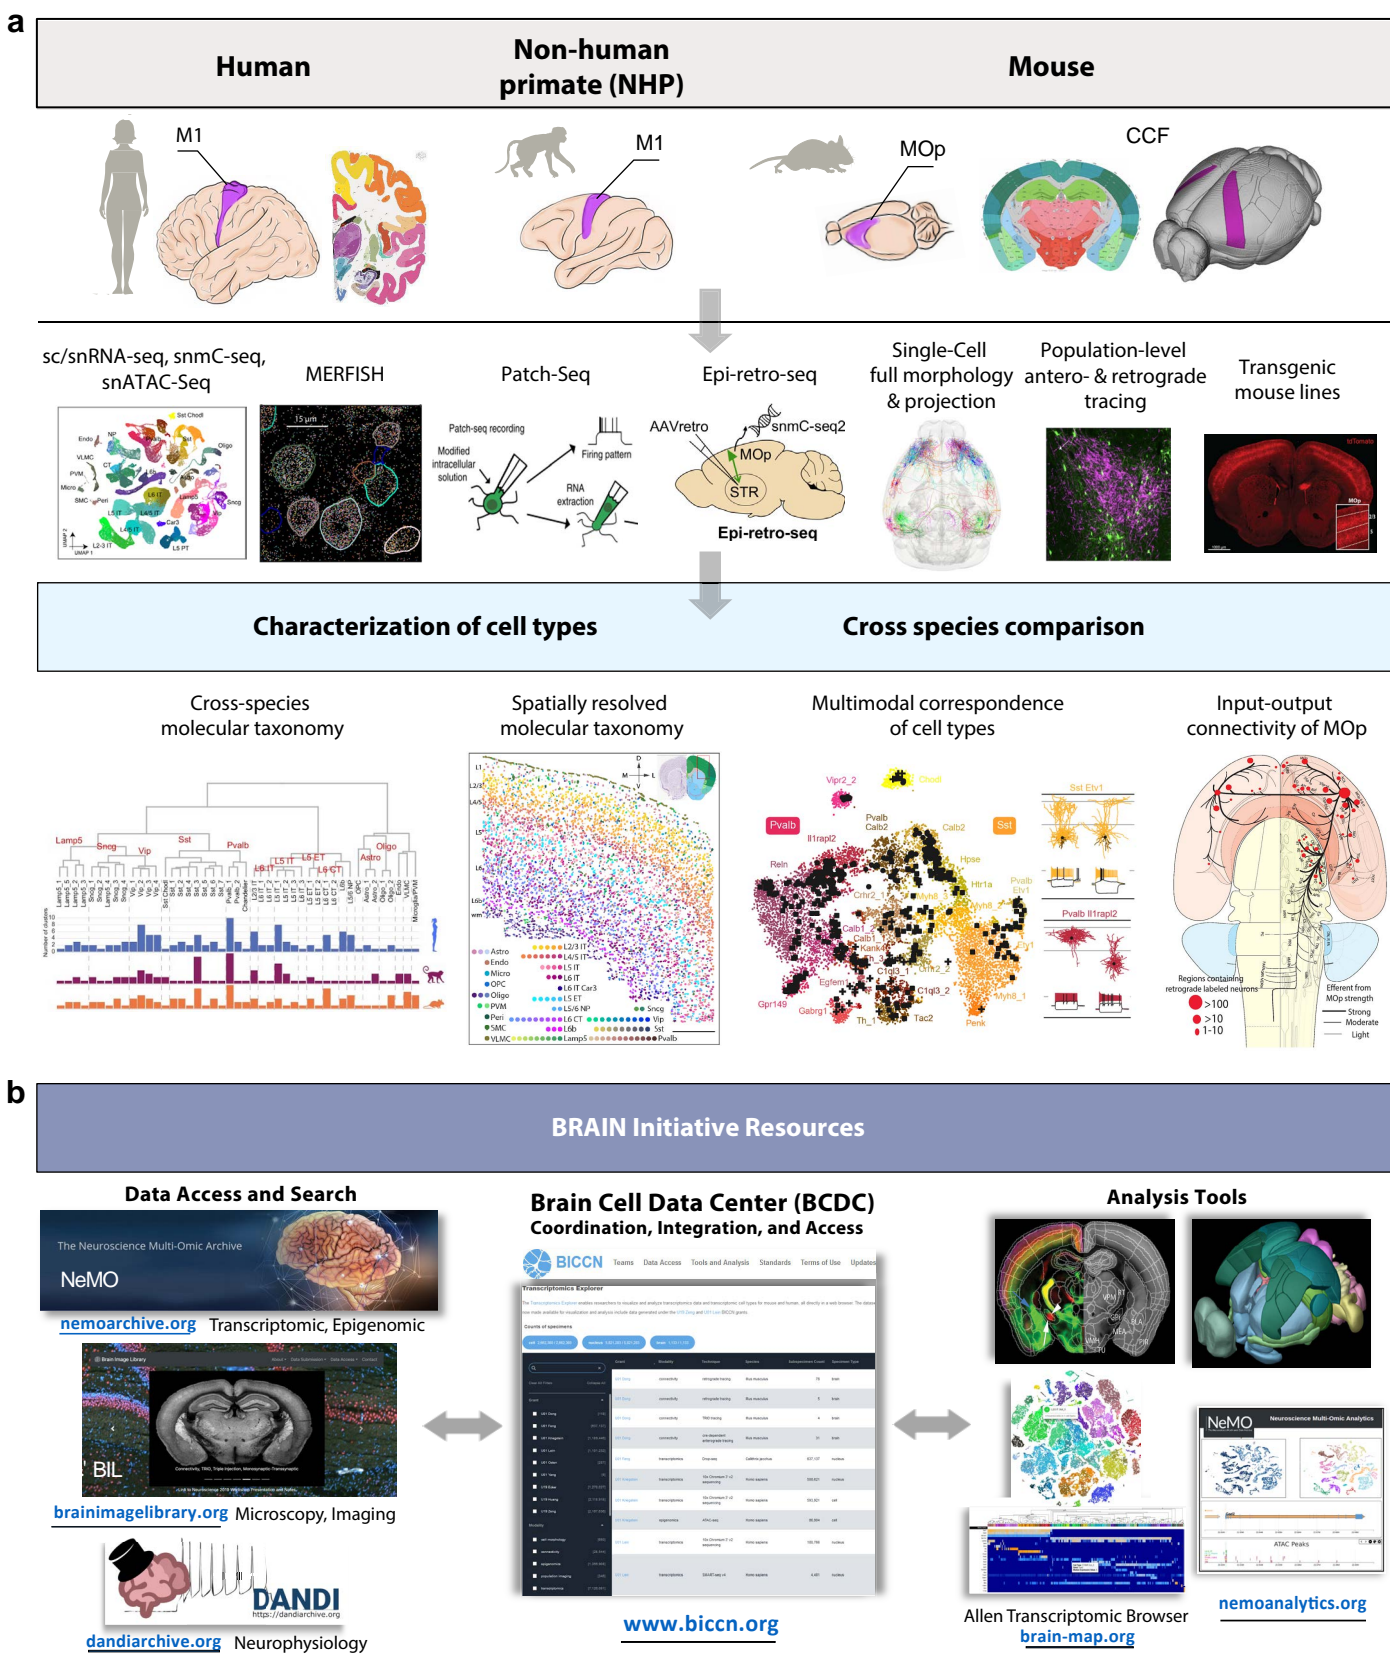

## A multimodal cell census and atlas of the mammalian primary motor cortex

### 191 RESULTS

192

#### 193 Molecular definition of cell types in MOp

194 The mouse MOp molecular taxonomy is derived from 9 datasets, including seven sc/snRNA-seq  
195 datasets and one each of snmC-Seq2 and snATAC-Seq datasets (companion paper <sup>45</sup>). The  
196 combined seven sc/snRNA-seq datasets (>700,000 cells total) had the advantages of large  
197 number of cells profiled using the droplet-based 10x Chromium v2 or v3 method and deep full-  
198 length sequencing using the plate-based SMART-Seq v4 method, resulting in a consensus  
199 transcriptomic taxonomy for the mouse MOp with the greatest resolution compared to other data  
200 types, containing 116 clusters or transcriptomic types (t-types), 90 of which were neuronal types  
201 <sup>45</sup>. We used this mouse MOp transcriptomic taxonomy as the anchor for comparison and cross-  
202 correlation of cell-type classification results across all data types. We further utilized two  
203 computational approaches, SingleCellFusion (SCF) and LIGER, to combine the seven  
204 transcriptomic with two epigenomic datasets and derive an integrated molecular taxonomy  
205 consisting of 56 neuronal cell types (corresponding to the 90 transcriptomic neuronal types) for  
206 the mouse MOp, with highly consistent molecular profiles based on transcriptomics, DNA-  
207 methylation, and open chromatin <sup>45</sup> (**Fig. 2a**). Critically, this integrated taxonomy enabled us to  
208 link RNA transcripts with epigenomic marks identifying potential cell-type-specific cis-  
209 regulatory elements (CREs) and transcriptional regulatory networks. Similarly, we established  
210 M1 cell type taxonomies for human (127 t-types) and marmoset (94 t-types) by unsupervised  
211 clustering of snRNA-seq data, followed by integration with epigenomic datasets (companion  
212 paper <sup>48</sup>).

213

214 To establish a consensus classification of MOp/M1 cell types among mouse, human and  
215 marmoset, we integrated snRNA-seq datasets across species and identified 45 conserved  
216 transcriptomic types that spanned three major cell classes, including 24 GABAergic, 13  
217 glutamatergic, and 8 non-neuronal types (**Fig. 2b, Extended Data Fig. 1**). These types were  
218 grouped into broader subclasses based on shared developmental origin for GABAergic inhibitory  
219 neurons [i.e., three caudal ganglionic eminence (CGE)-derived subclasses (Lamp5, Sncg and  
220 Vip) and two medial ganglionic eminence (MGE)-derived subclasses (Sst and Pvalb)], layer and  
221 projection pattern in mouse for glutamatergic excitatory neurons [i.e., intratelencephalic (IT),  
222 extratelencephalic (ET), corticothalamic (CT), near-projecting (NP) and layer 6b (L6b)], and  
223 non-neuronal functional subclass (e.g., oligodendrocytes and astrocytes) (**Table 2**). Note that the  
224 layer 5 extratelencephalic (L5 ET) neurons had been named as pyramidal tract (PT) neurons or  
225 subcerebral projection neurons (SCPN) in the literature <sup>81,82</sup>; in this study we chose to use the  
226 name L5 ET for this subclass of neurons to be more representative across cortical areas and  
227 species (**Supplementary Notes**). The resolution of this cross-species conserved taxonomy was  
228 lower than that derived from each species alone, due to gene expression variations among  
229 species. The degree of species alignments varied across consensus types (**Fig. 2c**); some types  
230 could be aligned one-to-one (e.g., Lamp5\_1, L6 IT\_3), while others aligned several-to-several

## A multimodal cell census and atlas of the mammalian primary motor cortex

231 (e.g., Pvalb\_1, L2/3 IT, L5 IT\_1). This may reflect over- or under-clustering, limitations in  
232 aligning highly similar cell types or species-specific expansion of cell-type diversity (companion  
233 paper <sup>65</sup>).

234  
235 We hypothesized that cell types would share more similar gene expression profiles between  
236 human and marmoset than between either primate and mouse because primates share a more  
237 recent common ancestor. Indeed, we found that between primates, transcriptomic profiles of  
238 consensus cell types were more correlated and had 25-50% fewer differentially expressed (DE)  
239 genes than between primates and mouse (**Fig. 2d,e**). Three non-neuronal types had greater  
240 spearman correlations of overall gene expression (**Fig. 2d**, right columns) between marmoset and  
241 mouse likely because non-neuronal cells were undersampled in human M1 resulting in fewer  
242 rare types <sup>48</sup>. Robust conservation of cell types across mammals, including types with known  
243 specificity in electrical properties and connectivity such as chandelier cells and long-range  
244 projecting *Sst*-expressing cells (*Sst Chodl*), is strong evidence for the functional significance of  
245 these types.

246  
247 Glutamatergic subclasses expressed many marker genes (using Seurat's FindAllMarkers function  
248 with test.use set to 'roc', >0.7 classification power) compared to other subclasses, and the  
249 majority of markers were species-specific (**Fig. 2f,g**). The evolutionary divergence of marker  
250 gene expression may reflect species adaptations or relaxed constraints on genes that can be  
251 substituted with others for related cellular functions. Subclasses also had a core set of marker  
252 genes that were conserved across all three species (**Fig. 2g**); these genes are candidates for  
253 consistent labeling of consensus cell types and for determining the conserved features of those  
254 cells that are central to their function. GABAergic consensus types also had conserved markers  
255 with similar absolute expression levels across species (**Fig. 2h**, bar plots) and relatively specific  
256 expressions compared to other cell types (**Fig. 2h**, heatmap). Marker genes of Lamp5\_2 (*NFIX*)  
257 and Pvalb\_1 (*TMEM132C*) GABAergic neurons showed evidence for cell-type-specific  
258 enhancers located in regions of open chromatin and DNA hypomethylation in both human (**Fig.**  
259 **2i**) and mouse (**Fig. 2j**).

260  
261 In summary, the multi-omic approach reveals a unified molecular genetic landscape of cortical  
262 cell types that integrates gene expression, chromatin state and DNA methylation maps and yields  
263 a robust molecular classification of cell types that is consistent between transcriptomic and  
264 epigenomic analyses. These studies further allow the identification of putative regulatory  
265 elements associated with cell type identity. Cell types are generally conserved between primates  
266 and rodents, and have a small number of conserved marker genes that are candidates for  
267 consistent labeling of conserved cell types.

268  
269

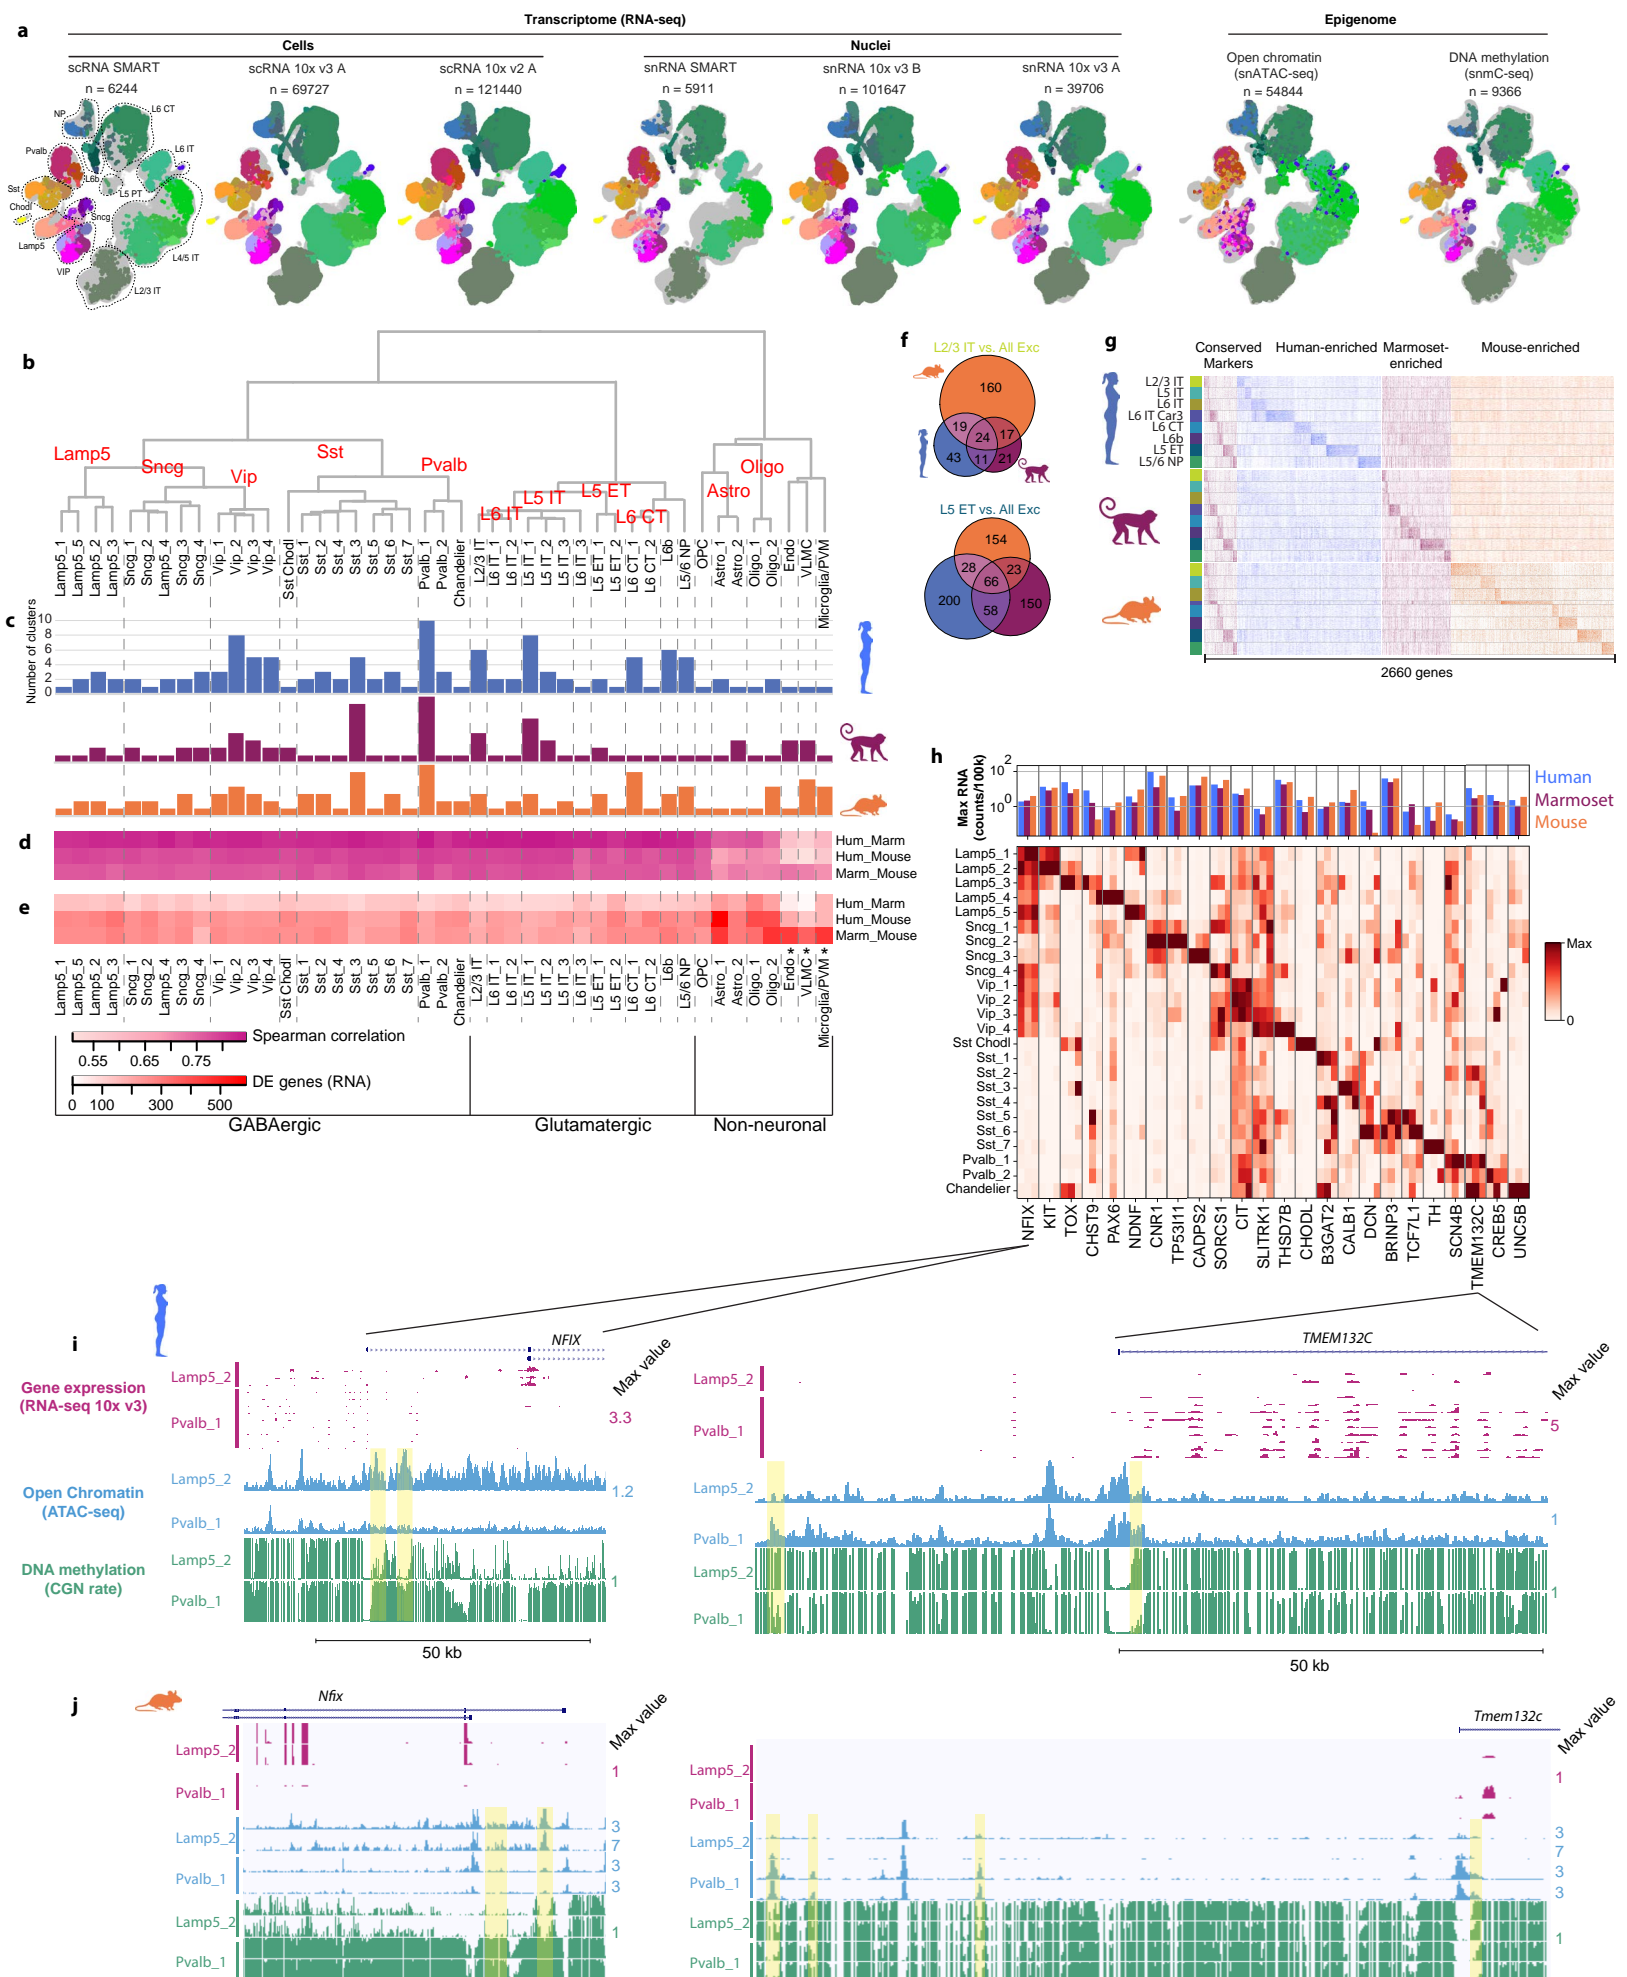

## A multimodal cell census and atlas of the mammalian primary motor cortex

270 **Figure 2. MOp consensus cell type taxonomy.** **a**, Integrated transcriptomic and epigenomic  
 271 datasets using SCF show consistent molecular cell-type signatures as revealed by a low-  
 272 dimensional embedding in mouse MOp. Each Uniform Manifold Approximation and Projection  
 273 (UMAP) plot represents one dataset. Colors indicate different subclasses. **b**, Dendrogram of  
 274 integrated human, marmoset, and mouse cell types based on single nucleus RNA-seq datasets  
 275 (10x Chromium v3). **c**, Number of within-species clusters that are included in each cross-species  
 276 cluster. **d-e**, For each consensus cluster, correlations (d) and differentially expressed (DE;  
 277 Wilcoxon test, FDR < 0.01 and log<sub>e</sub> fold-change > 2) genes (e) between pairs of species.  
 278 Asterisks denote non-neuronal populations that were under-sampled in human. **f**, Venn diagrams  
 279 of shared DE genes between species for L2/3 IT and L5 ET glutamatergic neuron subclasses. **g**,  
 280 Conserved and species-specific DE genes for all glutamatergic subclasses. Heatmap shows gene  
 281 expression normalized by the maximum for each gene for up to 50 randomly sampled nuclei  
 282 from each subclass and species. **h**, Conserved markers of GABAergic neuron types across three  
 283 species. **i-j**, Genome browser showing transcriptomic and epigenetic signatures for gene markers  
 284 of Lamp5\_2 (*NFIX*) and Pvalb\_1 (*TMEM132C*) GABAergic neurons in human (i) and mouse (j).  
 285 Yellow bars highlight sites of open chromatin and DNA hypomethylation in the cell type with  
 286 corresponding marker expression.  
 287

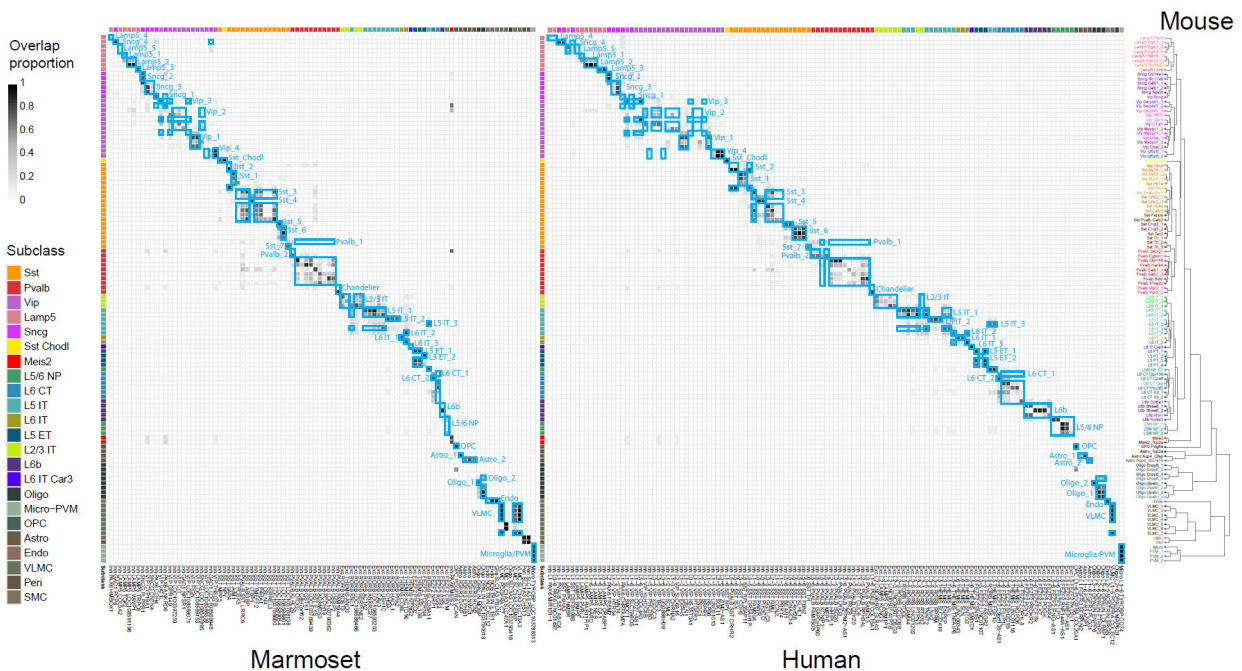

288  
 289

290 **Extended Data Figure 1.** Cluster overlap heatmap showing the proportion of nuclei in each pair  
 291 of species clusters that are mixed in the cross-species integrated space. Cross-species consensus  
 292 clusters are indicated by labeled blue boxes. Mouse clusters (rows) are ordered by the mouse  
 293 MOp transcriptomic taxonomy dendrogram reproduced from <sup>45</sup>. Marmoset (left columns) and  
 294 human (right columns) transcriptomic clusters (reproduced from <sup>48</sup> are ordered to align with

## A multimodal cell census and atlas of the mammalian primary motor cortex

295 mouse clusters. Color bars at top and left indicate subclasses of within-species clusters.

296

297

### 298 **Spatially resolved cell atlas of the mouse MOp by MERFISH**

299 Sequencing-based single-cell methods require dissociation of cells from tissues, and hence the  
300 spatial organization of neuronal and non-neuronal cells, which is critical for brain function, is  
301 lost. To obtain a spatially resolved cell atlas of the mouse MOp region, we used MERFISH, a  
302 single-cell transcriptome imaging method<sup>28,29</sup>, to identify cell types *in situ* and map their spatial  
303 organization. We selected a panel of 258 genes (254 of which passed quality control) to image  
304 by MERFISH, on the basis of both prior knowledge of marker genes for major subclasses of  
305 cells in the cortex and marker genes differentially expressed in the neuronal clusters identified by  
306 the sn/scRNA-seq experiments, and we imaged ~300,000 individual cells across the MOp and its  
307 vicinity (companion paper<sup>54</sup>).

308

309 Clustering analysis of the MERFISH-derived single-cell expression profiles resulted in a total of  
310 95 cell clusters in MOp, including 42 GABAergic, 39 glutamatergic, and 14 non-neuronal  
311 clusters (**Fig. 3a,b**), as well as four distinct cell clusters observed exclusively outside the MOp  
312 (in striatum or lateral ventricle). These 95 clusters showed excellent correspondence with the 116  
313 cell clusters identified by the sn/scRNA-seq datasets<sup>54</sup>. MERFISH analysis also revealed  
314 clusters not identified by scRNA-seq and vice versa, mostly in the form of refined splitting of  
315 clusters<sup>54</sup>.

316

317 The spatial distribution of the clusters derived from MERFISH showed a complex, laminar  
318 organization of cells in the MOp (**Fig. 3c**). MERFISH data divided glutamatergic neurons into  
319 IT, ET, NP, CT, and L6b subclasses, each of which were further divided into finer clusters.  
320 Many of these clusters adopted narrow distributions along the cortical depth direction that  
321 subdivided individual cortical layers, though often without discrete boundaries<sup>54</sup>. Notably, IT  
322 cells, the largest branch of neurons in the MOp, formed a largely continuous spectrum of cells  
323 with gradual changes both in their expression profiles and in their cortical depth positions, in a  
324 highly correlated manner<sup>54</sup> (**Fig. 3d**). The five major subclasses of GABAergic neurons (Lamp5,  
325 Sncg, Vip, Sst and Pvalb) were also divided into finer clusters. Interestingly, many individual  
326 GABAergic clusters showed layered distribution as well, preferentially residing within one or  
327 two cortical layers<sup>54</sup>. Among the non-neuronal cell clusters, VLMCs formed the out-most layer  
328 of cells of the cortex, mature oligodendrocytes and some astrocytes were enriched in white  
329 matter, whereas other major subclasses of non-neuronal cells were largely dispersed across all  
330 layers. In addition to the laminar organization, MERFISH analysis also revealed interesting  
331 spatial distributions of cell types along the medial-lateral and anterior-posterior axes<sup>54</sup>. Overall,  
332 the 95 neuronal and non-neuronal cell clusters in the MOp form a complex spatial organization  
333 refining traditionally defined cortical layers.

334



## A multimodal cell census and atlas of the mammalian primary motor cortex

335 Integration of retrograde tracing with MERFISH (Retro-MERFISH) further allowed us to map  
336 the projection targets of different neuronal cell types in the MOp. By injecting retrograde tracers  
337 into several different cortical areas (secondary motor cortex, primary somatosensory cortex, and  
338 temporal association area) and imaging retrograde labels together with the MERFISH gene panel  
339 in the MOp (**Fig. 3e**), we observed that all three examined target regions received inputs from  
340 multiple cell clusters in the MOp, primarily from IT cells. In addition, each IT cluster projected  
341 to multiple regions, with each region receiving input from a different composition of IT clusters  
342<sup>54</sup>. Overall, the projection of MOp neurons does not follow a simple “one cell type to one target  
343 region” pattern, but rather forms a complex many-to-many network.

344  
345 In summary, these MERFISH measurements revealed the spatial organization of neuronal and  
346 non-neuronal cell types in the MOp with an unprecedented resolution and granularity.  
347 Integration of MERFISH with retrograde tracing further allowed determination of both gene  
348 expression profiles and projection targets with single-cell resolution, revealing the compositions  
349 and spatial distributions of MOp neurons that project to several cortical regions.

350  
351  
352 **Figure 3. In situ cell-type identification, spatial mapping and projection mapping of**  
353 **individual cells in the MOp by MERFISH. a**, UMAP of the ~300,000 cells in the mouse MOp  
354 imaged by MERFISH. Cell clusters are grouped into 23 subclasses, and all cells in the same  
355 subclass are plotted in the same color. **b**, Dendrogram showing the hierarchical relationship  
356 among the 39 glutamatergic, 42 GABAergic, and 14 non-neuronal clusters in the mouse MOp  
357 identified by MERFISH, colored by the subclass that each cluster belongs to. **c**, Left: Spatial map  
358 of the cell clusters identified in a coronal slice (Bregma +0.90), with cells colored by their cluster  
359 identity as shown in the color index. Top right: Zoom-in map of the boxed region of the left  
360 panel. Bottom right: Spatial localization of individual RNA molecules in the boxed region of the  
361 top right panel, colored by their gene identity. The segmented cell boundaries are colored  
362 according to the cell clusters they belong to. **d**, The IT neurons in the same coronal slice as  
363 shown in **c**. The IT neurons are colored by their cluster identity, as shown in the color index,  
364 together with L6b cells in dark blue to mark the bottom border of the cortex. All other cells are  
365 shown in grey. **e**, Neuronal cluster identities of the cells projecting into three other regions of the  
366 brain, secondary motor cortex (MOs), primary somatosensory cortex (SSp), and temporal  
367 association area (TEa). Dye-labeled cholera toxin b (CTb) are used as retrograde tracers, and the  
368 CTb signals and the MERFISH gene panel are imaged in the MOp to determine both the cell  
369 cluster identities (left panel) and projection targets (right panel) of individual cells. Only clusters  
370 with 3 or more cells labeled by CTb are shown in color and the remaining cells are shown in  
371 grey.

372  
373

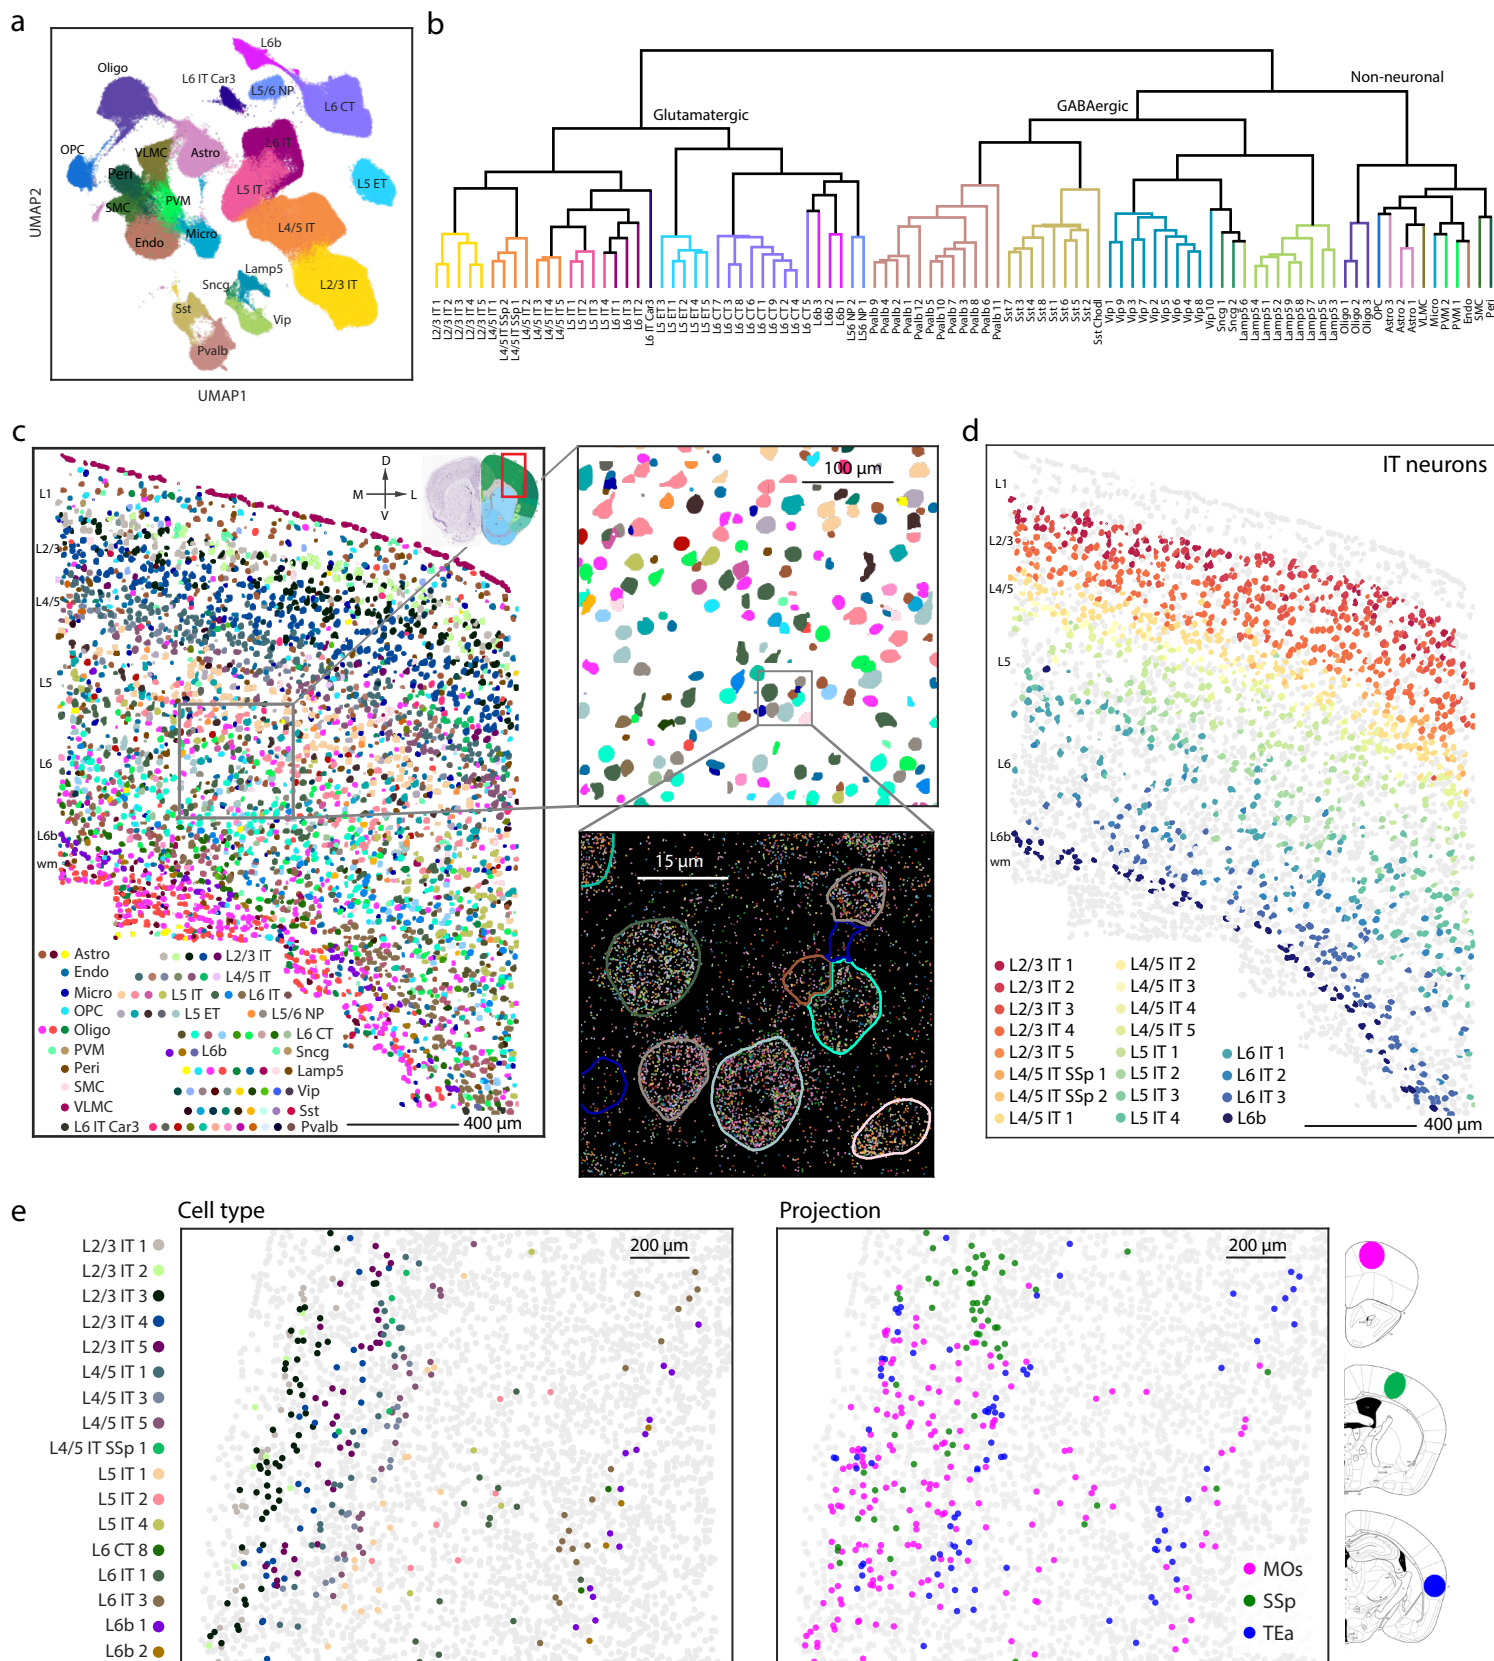

## A multimodal cell census and atlas of the mammalian primary motor cortex

### 374 **Multimodal analysis of cell types with Patch-seq**

375 To characterize the electrophysiological and morphological phenotypes and laminar location of  
376 the transcriptomically identified cell types, i.e., the t-types, we used the recently developed  
377 Patch-seq technique<sup>30,62</sup>. We patched >1,300 neurons in MOp of adult mice, recorded their  
378 electrophysiological responses to a set of current steps, filled them with biocytin to recover their  
379 morphology (~50% of the cells) and obtained their transcriptomes using Smart-seq2 sequencing  
380 (companion paper<sup>64</sup>). We mapped these cells to the mouse MOp transcriptomic taxonomy<sup>45</sup>.  
381 Our dataset covered all major subclasses of glutamatergic and GABAergic neurons, with cells  
382 assigned to 77 t-types (**Fig. 4a**). This allowed us to describe the electrophysiological and  
383 morphological phenotypes of most t-types (see examples in **Fig. 4b,c**).

384  
385 We found that the measured morpho-electrical (me) phenotype of a neuron was largely  
386 determined by its transcriptomic subclass, with different subclasses having distinct phenotypes.  
387 For example, Sst interneurons were often characterized by large membrane time constants,  
388 pronounced hyperpolarization sag, and rebound firing after stimulation offset. However, within  
389 each subclass, there was substantial variation in electrophysiological and morphological  
390 properties between t-types. This variation was not random but organized such that  
391 transcriptomically similar t-types had more similar morpho-electric properties than distant t-  
392 types. For example, excitatory t-types from the IT subclasses with more similar transcriptomes  
393 were located also at adjacent cortical depths, suggesting that distances in t-space co-varied with  
394 distances in the me-space, even within a layer (**Fig. 4g**). Likewise, the electrophysiological  
395 properties of Sst interneurons varied continuously across the transcriptomic landscape<sup>64</sup>.

396  
397 At the level of single t-types, we found that some t-types showed layer-adapting morphologies  
398 across layers (**Fig. 4e,f**) or even considerable within-type morpho-electric variability within a  
399 layer. For example, Vip Mybpc1\_2 neurons had variable rebound firing strength after stimulation  
400 offset. Surprisingly few t-types were entirely homogeneous with regard to the measured morpho-  
401 electric properties (**Fig. 4d**).

402  
403 In summary, we found that the morpho-electric phenotype of a neuron in MOp was primarily  
404 determined by the major subclass of neurons it belonged to, with different subclasses being  
405 transcriptomically as well as morpho-electrically distinct. Within each subclass, variation in  
406 electrophysiological and morphological properties often appeared to be continuous across the  
407 transcriptomic landscape, without clear-cut boundaries between neighbouring t-types.

408  
409 Patch-seq also permits direct comparison of the morpho-electric properties of homologous cell  
410 types across species<sup>48</sup>. Here we focused our analysis on one of the most recognizable  
411 mammalian neuron types, the gigantocellular Betz cells found in M1 of primates and large  
412 carnivores. These neurons are predicted to be in the layer 5 ET (L5 ET) subclass<sup>48</sup>, which also  
413 contains the homologous corticospinal projecting neurons in the mouse. To allow cross-species

## A multimodal cell census and atlas of the mammalian primary motor cortex

414 analysis of primate Betz cells and mouse ET neurons, we first created a joint embedding of  
415 excitatory neurons in mouse, macaque and human, which showed strong homology across all  
416 three species for the L5 ET subclass (**Fig. 4h**). Patch-seq recordings were made from L5 neurons  
417 in acute and cultured slice preparations of mouse MOp and macaque M1. We also capitalized on  
418 a unique opportunity to record from neurosurgical tissue excised from the human premotor  
419 cortex, which also contains Betz cells, during an epilepsy treatment surgery. To permit  
420 visualization of cells in heavily myelinated macaque M1 and human premotor cortex, AAV  
421 viruses were used to drive fluorophore expression in glutamatergic neurons in slice culture.

422  
423 Patch-seq cells in each species that mapped to the L5 ET subclass (**Fig. 4h**) were all large layer 5  
424 neurons that sent apical dendrites to the pial surface (**Fig. 4i**, note truncation in human Betz cell).  
425 However, macaque and human L5 ET neurons were much larger, and had long “tap root” basal  
426 dendrites that are a canonical hallmark of Betz cells<sup>83</sup>. Subthreshold membrane properties were  
427 relatively well conserved across species. For example, L5 ET neurons in all three species had a  
428 low input resistance, although it was exceptionally low in macaque and human (**Fig. 4j**).  
429 Conversely, suprathreshold properties of macaque and human Betz/ET neurons were highly  
430 specialized. Most notably, human and macaque neurons responded to prolonged suprathreshold  
431 current injections with a biphasic firing pattern in which a pause in firing early in the sweep was  
432 followed by a dramatic increase in firing late in the sweep (**Fig. 4k**). Intriguingly, we identified  
433 several genes encoding ion channels that were enriched in macaque and human L5 ET neurons  
434 compared with mouse (**Fig. 4l**). These primate specific ion channels may contribute to the  
435 distinctive suprathreshold properties of primate ET neurons. Together this indicates that primate  
436 Betz cells are homologous to mouse thick-tufted L5 ET neurons, but display phenotypic  
437 differences in their morphology, physiology and gene expression. Similar to transcriptomics,  
438 these results indicate strong conservation of cell subclasses but with significant species  
439 specializations in anatomical and functional properties.

440  
441

## A multimodal cell census and atlas of the mammalian primary motor cortex

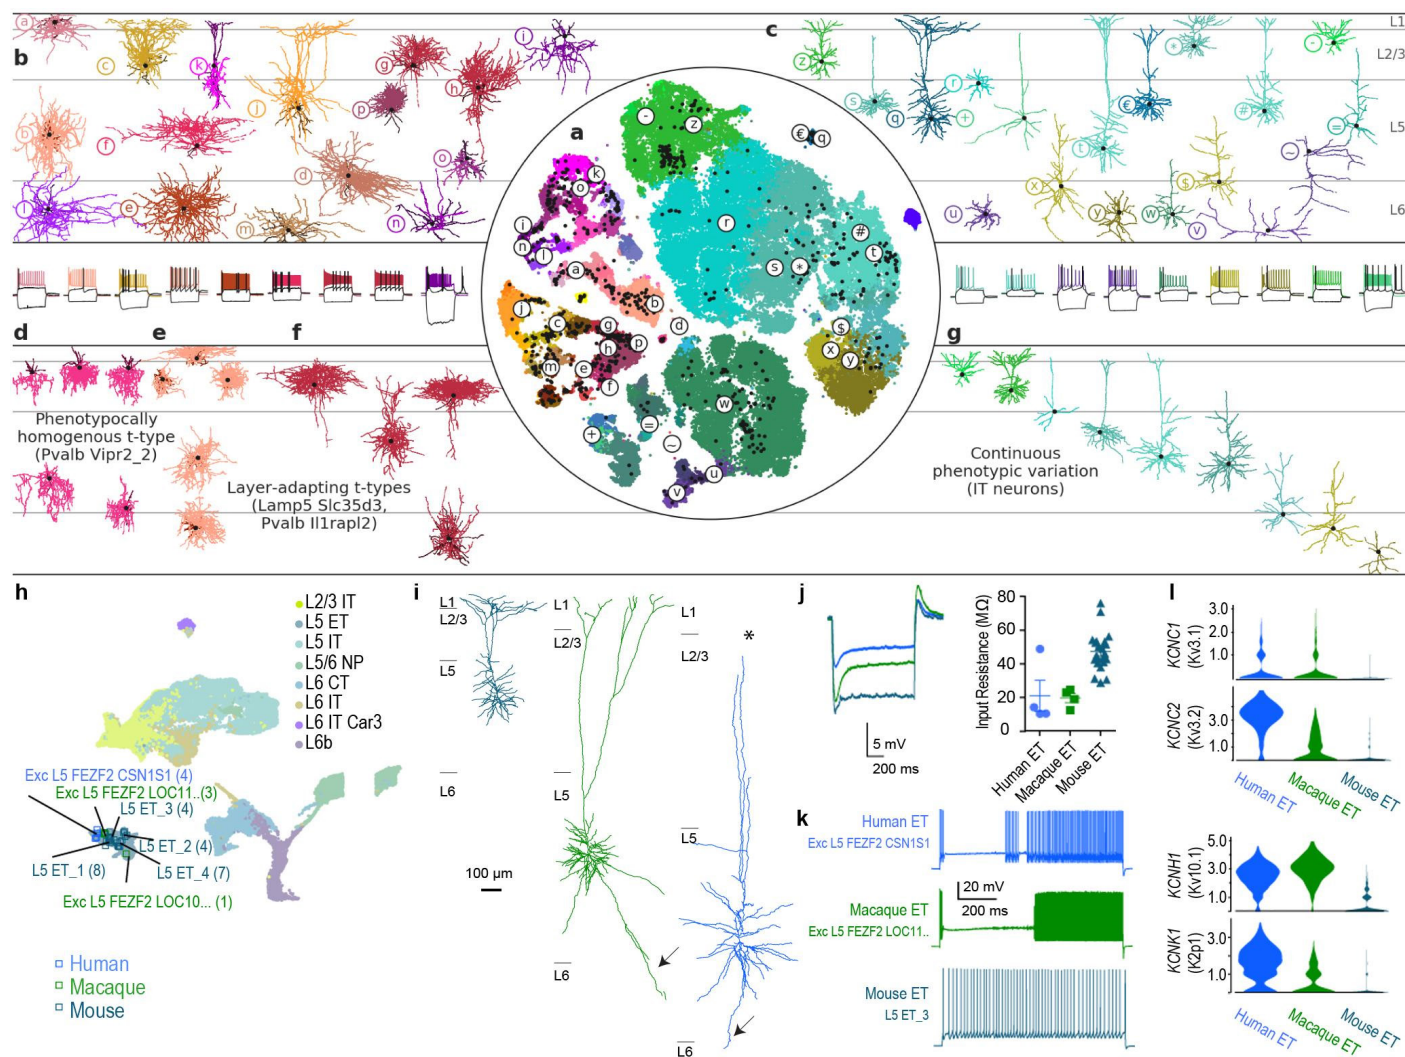

442  
 443 **Figure 4. Correspondence between transcriptomic and morpho-electrical properties of**  
 444 **mouse MOp neurons by Patch-seq, and cross-species comparison of L5 ET neurons. a, t-**  
 445 **SNE of the scRNA-seq 10x v2 dataset<sup>45</sup> with the Patch-seq neurons (black dots) positioned on**  
 446 **top of it<sup>84</sup>. b, Examples of GABAergic interneuron morphologies and electrophysiological**  
 447 **recordings (below). Letters refer to cells marked in a. c, Examples of glutamatergic excitatory**  
 448 **neuron morphologies and electrophysiological recordings. d, Example of a phenotypically**  
 449 **homogenous t-type (Pvalb Vipr2\_2, chandelier neurons). e-f, Two examples of t-types showing**  
 450 **layer-adapting morphologies (e, Lamp5 Slc35d3, neurogliaform cells; f, Pvalb Il1rapl2, fast-**  
 451 **spiking basket cells). g, Example of a transcriptomic subclass (excitatory IT neurons) that shows**  
 452 **continuous within-subclass co-variation between distances in transcriptomic space and**  
 453 **morphological space (compare the color ordering in a (right) with the color ordering in g. h,**  
 454 **UMAP visualization of cross-species integration of snRNA-seq data for glutamatergic neurons**  
 455 **isolated from mouse, macaque and human, with colors corresponding to cell subclass. Patch-seq**  
 456 **samples mapping to various ET neuron types are denoted by squares, color-coded by species. i,**

## A multimodal cell census and atlas of the mammalian primary motor cortex

457 Dendritic reconstructions of L5 ET neurons. The human (Exc L5 FEZF2 CSN1S1) and macaque  
458 (Exc L5 FEZF2 LOC114676463) neurons display classical Betz cell features, including taproot  
459 dendrites (arrows). Note, the human neuron is truncated (asterisk) before reaching the pial  
460 surface. **j**, Voltage response of mouse, macaque and human ET neurons to a 1 s, -300 pA current  
461 injection (left). Input resistance is low in all species, but exceptionally low in human and  
462 macaque Betz cells. Error bars represent SEM (right; macaque n=4, human n=4, mouse n=22;  
463 FDR corrected two-sided Wilcoxon ranked sum test (human vs mouse  $W=12$ ,  $p = 0.31$ ,  $d=2.09$ ;  
464 human vs monkey  $W = 5$ ,  $p = .49$ ,  $d=.08$ ; monkey v mouse  $W = 0$   $p = .0004.$ ,  $d = 2.5$ ). **k**,  
465 Example spike trains in response to a 10s suprathreshold current injection. Macaque and human  
466 L5 ET neurons tended to respond with a distinctive, biphasic firing pattern. **l**, Violin plots of  
467 enriched potassium channel gene expression in human and macaque compared to mouse L5 ET  
468 neurons.

469

470

### 471 **Multimodal correspondence by Epi-Retro-Seq**

472 To obtain a comprehensive view of the molecular diversity among projection neurons in MOp,  
473 we developed Epi-Retro-Seq (companion paper <sup>79</sup>) and applied it to mouse MOp neurons that  
474 project to each of the 8 selected brain regions that receive inputs from MOp (**Fig. 5a**). The target  
475 regions included two cortical areas, SSp and anterior cingulate area (ACA), and six subcortical  
476 areas, striatum (STR), thalamus (TH), superior colliculus (SC), ventral tegmental area and  
477 substantia nigra (VTA+SN), pons, and medulla (MY). Specifically, we injected the retrograde  
478 tracer rAAV2-retro-Cre <sup>77</sup> into the target region in INTACT mice <sup>85</sup>, which turned on Cre-  
479 dependent GFP expression in the nuclei of MOp neurons projecting to the injected target region.  
480 Individual GFP-labeled nuclei of MOp projection neurons were then isolated using fluorescence-  
481 activated nucleus sorting (FANS). Single-nucleus methylcytosine sequencing (snmC-Seq2) <sup>49</sup>  
482 was performed to profile the DNA methylation (mC) of each single nucleus.

483

484 After removing low-quality cells, potential doublets, and non-neuronal cells, we obtained high-  
485 quality methylomes for 2,111 MOp projection neurons. When co-clustering them with MOp  
486 neurons collected without enrichment of specific projections, we observed a precise agreement  
487 among all of the major cell subclasses (**Fig. 5b,c**), demonstrating the robustness of Epi-Retro-  
488 Seq to classify cell types. Although neurons projecting to different target regions were not  
489 completely separated on t-SNE, we observed the explicit enrichment of cortico-cortical and  
490 cortico-striatal projecting neurons in IT subclasses (L2/3, L4, L5 IT, L6 IT, and L6 IT Car3), and  
491 cortico-subcerebral projecting neurons in L5 ET. Many cortico-thalamic projecting neurons were  
492 also observed in L6 CT subclass (**Fig. 5d**). These observations are consistent with the known  
493 laminar distribution of the cortico-cortical and cortical-subcortical projection neurons <sup>81</sup>,  
494 reflecting the high quality of retrograde-labeling of neuronal nuclei in our Epi-Retro-Seq dataset.

495

## A multimodal cell census and atlas of the mammalian primary motor cortex

496 The enrichment of L5 ET neurons in the Epi-Retro-Seq data (40.2% vs. 5.62% in unbiased  
497 profiling of MOp using snmC-seq2) allowed a more detailed investigation of the subtypes of L5  
498 ET neurons which are known to project to multiple subcortical targets in TH, VTA+SN, pons  
499 and MY<sup>81</sup>. The 848 L5 ET neurons further segregated into 6 clusters (**Fig. 5e,f**). MY-projecting  
500 neurons showed a clear enrichment in L5 ET cluster 0 (**Fig. 5f,g**), in agreement with scRNA-Seq  
501 data for anterolateral motor cortex (ALM), part of MOs<sup>15,86</sup>. We used gene body non-CG  
502 methylation (mCH) levels to integrate the L5 ET Epi-Retro-Seq data with the ALM Retro-seq  
503 data and also observed the enrichment of MY-projecting cells in the same cluster<sup>79</sup>.

504  
505 A major advantage of DNA methylation profiling of neurons is its ability to obtain information  
506 for both genes and cis-regulatory elements. Specifically, mCH at gene bodies is strongly anti-  
507 correlated with gene expression in neurons, while promoter-distal differentially CG-methylated  
508 regions (CG-DMRs) are reliable markers of regulatory elements such as enhancers<sup>20</sup>. We thus  
509 identified 511 differentially CH-methylated genes (CH-DMGs) and 58,680 CG-DMRs across the  
510 L5 ET clusters (**Fig. 5h**). We also inferred transcription factors (TFs) that may contribute to  
511 defining the cell subclusters by identifying enriched TF-binding DNA sequence motifs within  
512 CG-DMRs (**Fig. 5i**). For example, *Ascl1* is a transcription factor whose motif was significantly  
513 enriched in the MY-projecting cluster. Previous studies had shown its necessity for neuronal  
514 differentiation and specification in multiple regions of the nervous system<sup>87,88</sup>. In addition, 230  
515 hypo-CH-DMGs were identified between the MY-projecting cluster and other projection  
516 neurons. Interestingly, one of the most differentially methylated genes is *Ptprg* (**Fig. 5j**), which  
517 interacts with contactin proteins to mediate neural projection development<sup>89</sup>.

518  
519 In summary, Epi-Retro-Seq mapping data for MOp revealed specific enrichment of MY-  
520 projecting neurons in one of the molecularly-defined subpopulations of MOp L5 ET neurons,  
521 allowing identification of regulatory elements for this unique cell type. In addition to MOp, we  
522 have performed 63 Epi-Retro-Seq mapping experiments for 7 cortical regions, comprising 26  
523 cortico-cortical projections and 37 cortico-subcortical projections<sup>79</sup>. Together, these epigenomic  
524 mapping data for projection neurons facilitates the understanding of gene regulation in  
525 establishing neuronal identity and connectivity, by discovering projection-specific gene  
526 regulatory elements which can be used to target specific types of projection neurons.

527  
528

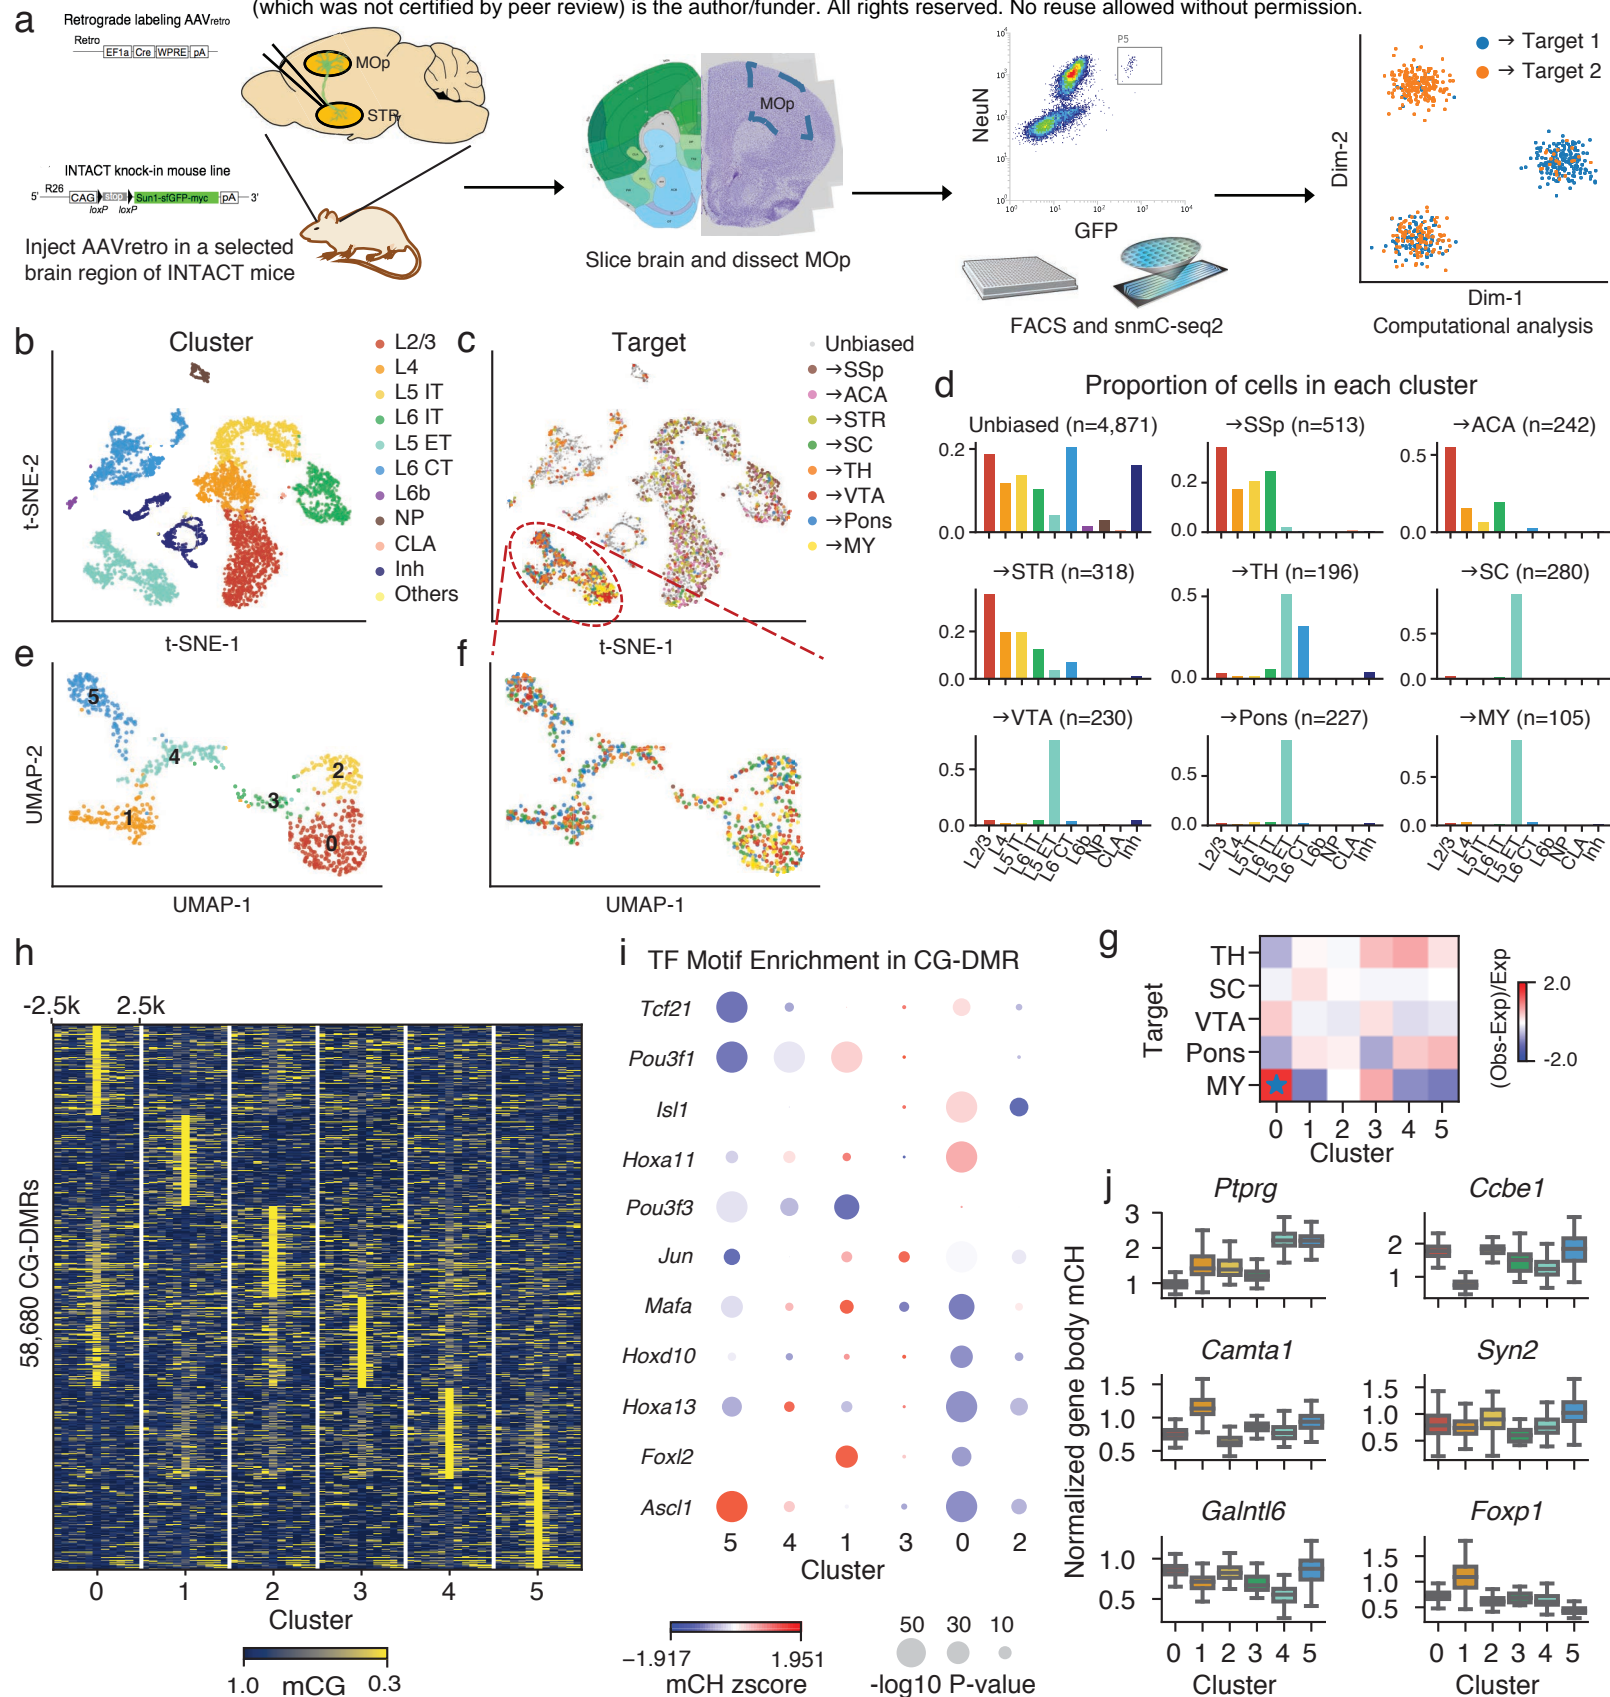



## A multimodal cell census and atlas of the mammalian primary motor cortex

529 **Figure 5. Epi-Retro-Seq links molecular cell type with distal projection targets. a,**  
530 **Workflow of Epi-Retro-Seq. b, c,** UMAP embedding of MOp cells profiled by Epi-Retro-Seq  
531 (n=2,115) and unbiased snmC-Seq2 (n=4,871) computed with 100kb-bin-level mCH, colored by  
532 subclasses (**b**) or projection targets (**c**). **d,** Distribution across subclasses of neurons from  
533 unbiased snmC-Seq2 and neurons projecting to each target. **e, f,** UMAP embedding of L5 ET  
534 cells in MOp profiled by Epi-Retro-Seq (n=848) computed with 100kb-bin-level mCH, colored  
535 by clusters (**e**) or projection targets (**f**). **g,** Enrichment of L5 ET neurons projecting to each target  
536 in each cluster. \* represents FDR<0.05. **h,** mCG levels at CG-DMRs identified between the six  
537 clusters and their flanking 2.5k regions. Top 100 DMRs in each cluster were shown. **i,** TF motif  
538 enrichment in CG-DMRs in each cluster. Color represents z-scored gene-body mCH level of the  
539 TFs, and size represents  $-\log_{10} P$  value of motif enrichment in the CG-DMRs. **j,** Boxplots of  
540 normalized mCH levels at gene-bodies of example CH-DMGs in the six clusters. Numbers of  
541 cells represented by the boxes are 242, 165, 118, 42, 119, and 162 for the six clusters. The  
542 elements of boxplots are defined as: center line, median; box limits, first and third quartiles;  
543 whiskers,  $1.5 \times$  interquartile range.

544

545

### 546 **MOp projection neuron types and input-output wiring diagram**

547 Building upon the molecularly defined and spatially resolved cell atlas (**Fig. 3**) and the multi-  
548 modal correspondence between gene expression and morpho-electric properties of MOp  
549 neurons (**Fig. 4**), we next describe a comprehensive cellular resolution input-output MOp  
550 wiring diagram. To achieve this, we combined classic tracers, genetic viral labeling in Cre  
551 driver lines and single neuron reconstructions with high-resolution, brain-wide imaging,  
552 precise 3D registration to CCF, and computational analyses (companion paper <sup>69</sup>).

553

554 First, we systematically characterized the global inputs and outputs of MOp upper limb (MOp-  
555 ul) region using classic anterograde (PHAL) and retrograde (CTb) tract tracing <sup>69</sup> (**Fig. 6a**). At  
556 the macro-scale, MOp-ul projects to more than 110 gray matter regions and cervical spinal  
557 cord, and ~60 structures in the cerebral cortex and thalamus project back to MOp-ul.

558

559 Next, we generated a fine-grained areal and laminar distribution map of multiple MOp-ul  
560 projection neuron populations using retrograde pathway-tracing. Accordingly, we identified 25  
561 distinct neuron projection types based on their unique combinations of axonal targets and  
562 laminar somatic distributions (**Fig. 6b**, top; for details see <sup>69</sup>). For example, IT cells (e.g. TEa-  
563 targeting or contralateral MOp-targeting) are distributed throughout L2-L6b; ET cells (pons- or  
564 medulla-targeting) are distributed primarily in L5b and most CT (posterior thalamic nucleus-  
565 targeting) neurons are distributed in L6a.

566

567 In parallel with these tracer-labeled, projection- and layer-defined cell types, we quantitatively  
568 characterized the distribution patterns of neuronal subpopulations in the MOp-ul labeled in 28

## A multimodal cell census and atlas of the mammalian primary motor cortex

569 Cre-expressing “driver” lines (**Fig. 6b**, bottom). These lines selectively label neurons from  
570 different IT (e.g. *Cux2*, *Plxnd1*, *Tlx3*), L5 ET (*Rbp4*, *Sim1*, *Fezf2*), and CT (*Ntsr1*, *Tle4*)  
571 subpopulations with distinct laminar distributions <sup>75,90,91</sup>.

572  
573 Subsequently, we used viral tracers to systematically examine MOp-ul cell-type-specific inputs  
574 and outputs (**Fig. 6c**). First, neurons projecting *to* Cre-defined starter cells were labeled using  
575 transsynaptic rabies viral tracing methods; an example from the *Tlx3* L5 IT line is shown in  
576 **Fig. 6c** (upper left, red). Projections *from* MOp were labeled following AAV-GFP injections  
577 into C57BL6/J mice, revealing patterns consistent with PHAL tracing results (**Fig. 6a**).  
578 Projections from L2/3 IT, L4 IT, L5 IT, L5 ET, and L6 CT cells were mapped following  
579 injections of Cre-dependent viral tracers into Cre lines selective for these laminar- and  
580 projection- cell subclasses <sup>71</sup>. Most Cre line anterograde tracing experiments revealed a  
581 component of the overall output pathway (**Fig. 6c**). For example, the L6 *Ntsr1* line revealed a  
582 typical CT projection pattern with dense projections specific to thalamic nuclei. This result is  
583 consistent with labeling from retrograde injections in various thalamic nuclei (PO, VAL, VM)  
584 and cortical areas such as MOs and SSp (**Fig. 6b**, top). Further characterization of the  
585 distinctive projection patterns of several IT, L5 ET, and CT driver lines is provided in the  
586 anatomy companion paper <sup>69</sup>.

587  
588 To further refine the projection neuron characterization, we carried out single cell analysis by  
589 combining sparse labeling, high-resolution whole-brain imaging, complete axonal  
590 reconstruction and quantitative analysis (companion papers <sup>68,69</sup>); additional analysis was also  
591 conducted using BARseq <sup>69</sup>, a high-throughput projection mapping technique based on *in situ*  
592 sequencing <sup>67</sup>. We augmented the full morphology reconstruction dataset with publicly  
593 available single cell reconstructions in MOp from the Janelia Mouselight project <sup>26</sup>. We  
594 systematically characterized axonal projections of 151 single MOp pyramidal neurons. This  
595 analysis revealed a rich diversity of projection patterns within the IT, ET and CT subclasses  
596 (**Fig. 6c,d**). For example, individual L6 neurons display several distinct axonal arborization  
597 targets that likely contribute to the composite subpopulation output described for the *Ntsr1* and  
598 *Tle4* driver lines (**Fig. 6d**). Confirming and extending previous reports <sup>86</sup>, we characterized  
599 detailed axonal trajectories and terminations of two major types of L5b ET cells, namely  
600 medulla-projecting and non-medulla projecting neurons; both types may collateralize in the  
601 thalamus and terminate in the midbrain (**Fig. 6d**). Individual IT cells across L2-L6 also  
602 generate richly diverse axonal trajectories (detailed in <sup>68,69</sup>). Further analyses of complete single  
603 neuron morphologies, precisely registered in the CCF, will provide the ultimate resolution  
604 toward defining anatomical cell types and clarify the anatomical heterogeneity described at the  
605 subpopulation level.

606  
607 In summary, combining multiple approaches complementary in their coverage, throughput, and  
608 resolution, we provide a comprehensive identification of major projection neuron types with

## A multimodal cell census and atlas of the mammalian primary motor cortex

609 correspondence to molecular markers. We further delineate their input-output patterns at the  
 610 subpopulation level and describe projection patterns at single-cell resolution, deriving the first  
 611 multi-scale wiring diagram of MOp. A major future goal is to link these anatomic and  
 612 especially projection types with transcriptomic types (**Fig. 2b**), with precise registration to a  
 613 spatial atlas (e.g. **Fig. 3e**).  
 614

### a. Global inputs and outputs of the MOp-ul

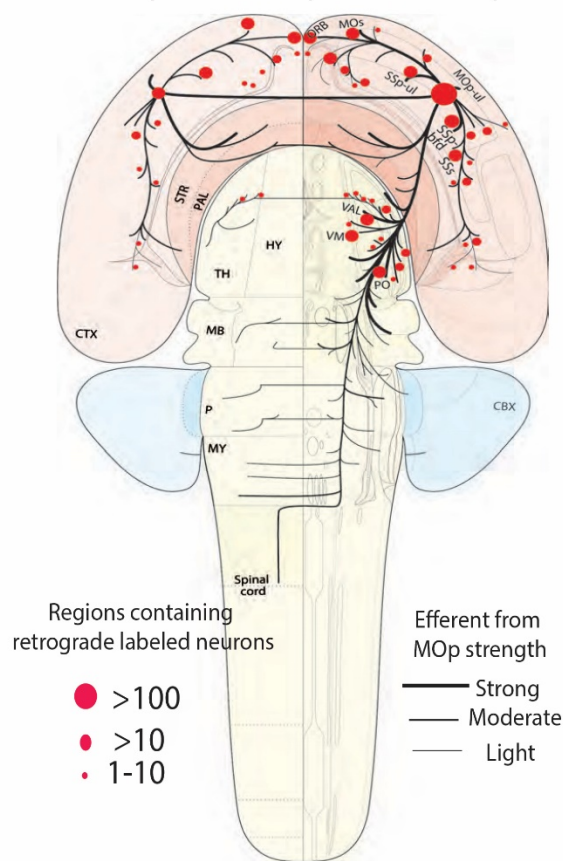

### b. Characterization of MOp neuron types

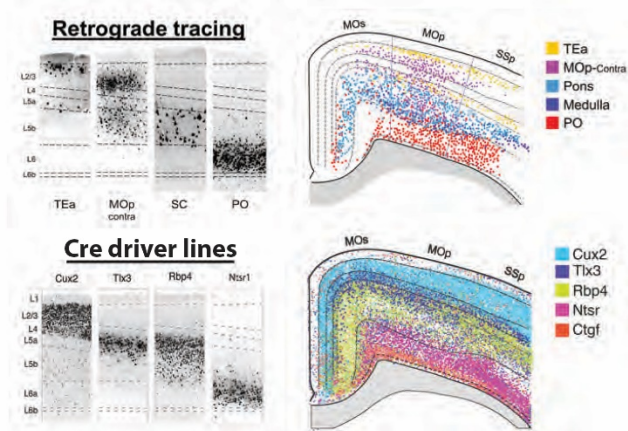

### c. 3D view of multi-scale projection pathways

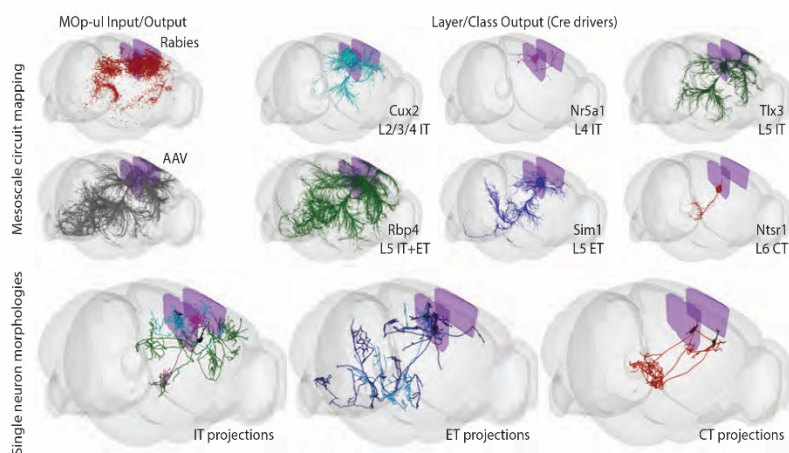

### d. MOp neuron type schema

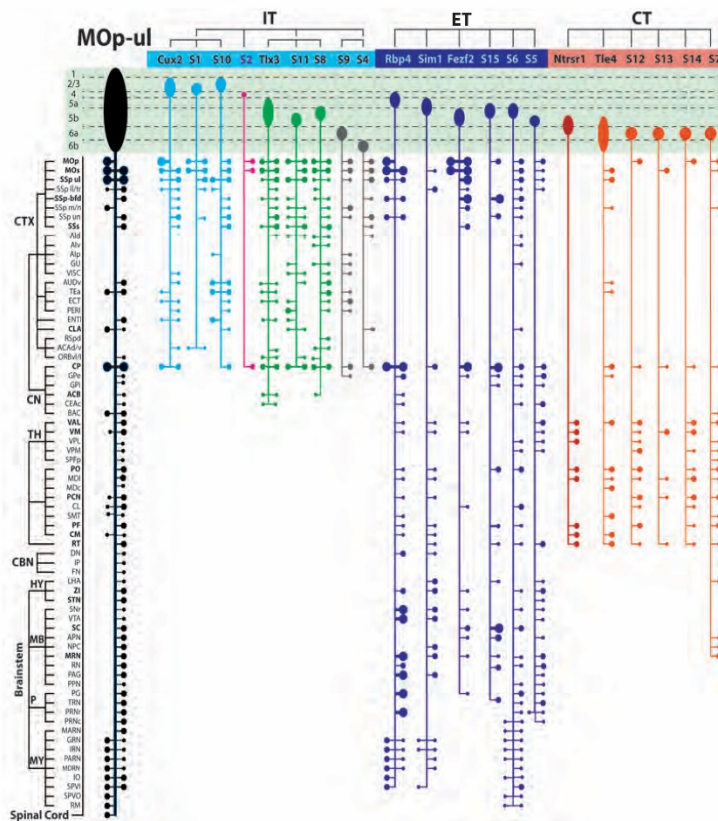

## A multimodal cell census and atlas of the mammalian primary motor cortex

615 **Figure 6. Global wiring diagram and anatomical characterization of MOp-ul neuron**  
616 **types. a**, Flatmap representation of the MOp-ul input/output wiring diagram. Black lines and  
617 red dots indicate axonal projections (outputs) and retrograde labeling sources (inputs),  
618 respectively, with line thickness and dot sizes representing relative connection strengths. Most  
619 MOp-ul projection targets in the cortex and thalamus also contain input sources, suggesting bi-  
620 directional connections. The flatmap is adapted from the Swanson Brainmap 4.0 and the mouse  
621 brain flatmap<sup>92</sup>. **b**, MOp-ul neurons classified by projection targets or transgenic *Cre*  
622 expression. (Top) Retrograde tracing using CTB revealed layer-specific distributions of MOp-  
623 ul neurons with respect to their major projection targets. Representative images (left) show  
624 neurons labeled by CTB injections into cortical areas (TEa, contralateral MOp), superior  
625 colliculus (SC) in the midbrain, and posterior complex (PO) of the thalamus. Detected cells  
626 were pseudo-colored and overlaid onto a schematic coronal section near the center of MOp-ul  
627 (right). MOp neurons that project to TEa are distributed in L2 and L5 (yellow), to the  
628 contralateral MOp in L2-L6b (purple), to targets in the pons and medulla in L5b (blue), and to  
629 thalamus in L6a (red). (Bottom) The distribution of neurons labeled in 28 transgenic *Cre* lines  
630 was mapped in MOp and across the whole cortex. Images (left) show laminar patterns of Cre+  
631 nuclei in MOp-ul from four driver lines (*Cux2*, *Tlx3*, *Rbp4*, and *Ntsr1*). Detected nuclei from  
632 these lines, plus the *Ctgf-Cre* line, were pseudo-colored and overlaid onto a schematic coronal  
633 section near the center of MOp-ul (right). Cre+ nuclei are found in L2-4 in *Cux2*; L5a and  
634 superficial L5b in *Tlx3*; L5a and L5b in *Rbp4*; L6a in *Ntsr1*, and L6b in *Ctgf*. **c**, 3D views  
635 show brain-wide MOp input-output patterns at the population and single cell resolution. (Top  
636 left) Regional MOp inputs and outputs were mapped using retrograde (in red, example shows  
637 rabies tracing from the *Tlx3-Cre* driver line) and anterograde (in black, example shows AAV-  
638 EGFP) tracing methods. (Top right) Whole-brain axonal trajectories from 6 Cre line-defined  
639 subpopulations labeled with Cre-dependent AAV tracer injections at the same MOp-ul  
640 location. (Bottom) Individual projection neurons were fully reconstructed following high-  
641 resolution whole-brain imaging of sparsely labeled cells. Representative examples of IT, ET,  
642 and CT neurons are shown in each panel. The two ET examples represent distinct projection-  
643 types; medulla (dark blue)- and non-medulla-projecting (light blue). 3D renderings were  
644 generated following registration of projection and reconstruction data into CCFv3 using  
645 BrainRender<sup>93</sup>. **d**, Projection patterns arising from major cell types, IT, ET and CT, with  
646 corresponding Cre-line assignment and somatic laminar location, compared with the overall  
647 projection pattern from the MOp-ul region (left, black). Along each vertical output pathway,  
648 horizontal bars on the right and left sides represent ipsilateral and contralateral collaterals,  
649 respectively, with dot sizes indicating the strength of axonal terminals in different targets.  
650 Brain structure nomenclature adopted from ARA<sup>94</sup>.

651

652

653 **Cell Type Targeting Tools**

## A multimodal cell census and atlas of the mammalian primary motor cortex

654 The identification and classification of MOp cell types based on single-cell integration of  
655 transcriptomes and epigenomes (**Fig. 2**), spatially resolved single-cell transcriptomics (**Fig. 3**)  
656 and anatomical and physiological analysis (**Fig. 4-6**) provides deep insights into the molecular  
657 basis of cellular diversity. In addition to establishing a principled basis for a taxonomy of brain  
658 cell types, knowledge of cellular gene expression also provides information to create mouse  
659 models in which genetically encoded reporters and actuators are targeted to these molecularly  
660 defined cell types<sup>33</sup>.

661  
662 As an embodiment of this approach, we used CRISPR/Cas-9-mediated homologous  
663 recombination in ES cells to generate genetically modified mice (Stafford, Daigle, Chance et  
664 al., companion manuscript in preparation) in which sequences encoding FlpO and Cre  
665 recombinases were targeted respectively to *Npnt* and *Slco2a1*, genes whose differential  
666 expression discriminates between two types of L5 ET neurons with distinct subcortical  
667 projection target specificities<sup>15,86</sup>. Confirming the assignment of *Npnt*- and *Slco2a1*-expressing  
668 cells to subsets of L2/3 IT and L5 ET neurons in the consensus transcriptomic taxonomy (**Fig.**  
669 **7a**), FlpO- and Cre-dependent tdTomato reporter expression in *Npnt-P2A-FlpO;Ai65F* and  
670 *Slco2a1-P2A-Cre;Ai14* mice localized to these cortical cell layers in MOp (**Fig. 7b**). In *Npnt*  
671 mice, both L2/3 and L5 neurons were labeled. In *Slco2a1* mice, predominantly L5 neurons  
672 were labeled. It is noteworthy that *Slco2a1* labeled cells occupying a deeper sub-lamina of L5  
673 than those targeted by *Npnt*, in accord with a previous report describing the two types of L5 ET  
674 neurons<sup>86</sup> (see also **Fig. 9** below). To test the projection specificity of neurons labeled by these  
675 novel genetic tools, we injected a recombinant AAV encoding a Cre-dependent EGFP reporter  
676 into deep L5 in MOp of a *Slco2a1-P2A-Cre* mouse (**Fig. 7c**). Consistent with previous studies  
677<sup>86</sup> as well as those described in **Figures 5, 6 and 9** (below), GFP-labeled axon terminals were  
678 found in pontine gray and medulla, indicating that this mouse line labels the medulla-  
679 projecting L5 ET cell type.

680  
681 To expand on cell type driver lines, we further built a genetic toolkit for cortical pyramidal  
682 neurons (PyNs) with more comprehensive coverage of projection types and with combinatorial  
683 strategies for improved specificity (companion paper<sup>75</sup>). First, we generated and characterized  
684 a set of 15 Cre and Flp gene knockin mouse driver lines for targeting major PyN  
685 subpopulations and progenitor types, guided by knowledge in their gene expression as well as  
686 developmental genetic programs (**Fig. 7d,e**). These include the broad CT (*Tbr1*, *Tle4*, *Foxp2*),  
687 ET (*Fezf2*, *Adcyap1*, *Tcerg1l*, *Sema3e*) and IT (*Plxnd1*, *Cux1*, and *Tbr1* late embryonic  
688 inductions) subclasses as well as subpopulations within these subclasses. When crossed with  
689 reporter alleles, these driver lines activated reporter expression that precisely recapitulated  
690 endogenous expression patterns highlighted here with 4 representative lines (**Fig. 7f**): L2/3 and  
691 L5a for IT-*Plxnd1* (IT<sup>*Plxnd1*</sup>), L5b and L6 for ET-*Fezf2* (ET<sup>*Fezf2*</sup>), L6 for CT-*Tle4* and CT-  
692 *Foxp2* (CT<sup>*Tle4*</sup>, CT<sup>*Foxp2*</sup>). To examine the projection pattern of these driver-defined  
693 subpopulations, we converted inducible CreER expression to constitutive Flp expression

## A multimodal cell census and atlas of the mammalian primary motor cortex

694 followed by MOp injection of a Flp-dependent AAV reporter vector (**Fig. 7g-i**). Largely as  
695 expected,  $IT^{Plxnd1}$  projected to multiple ipsi- and contra-lateral cortical areas and the  
696 striatum/caudate putamen;  $ET^{Fzf2}$  projected robustly to several ipsi-lateral cortical sites,  
697 striatum, and numerous subcortical targets including thalamus, medulla and the corticospinal  
698 tract;  $CT^{Tle4}$  projected to a set of highly specific thalamic nuclei. Surprisingly,  $CT^{Foxp2}$   
699 projected to a set of specific thalamic nuclei as well as to midbrain, brainstem and corticospinal  
700 tract. Further characterization of this set of new driver lines (**Fig. 7e**) is presented in <sup>75</sup>.

701  
702 Together, these tools and strategies establish an experimental approach for accessing  
703 hierarchically organized neuronal cell types at progressively finer resolution. Such genetic  
704 access will enable an integrated multi-modal analysis to further validate and characterize these  
705 cell populations as well as to explore their multi-faceted function in neural circuit operation  
706 and behavior.--

707

708

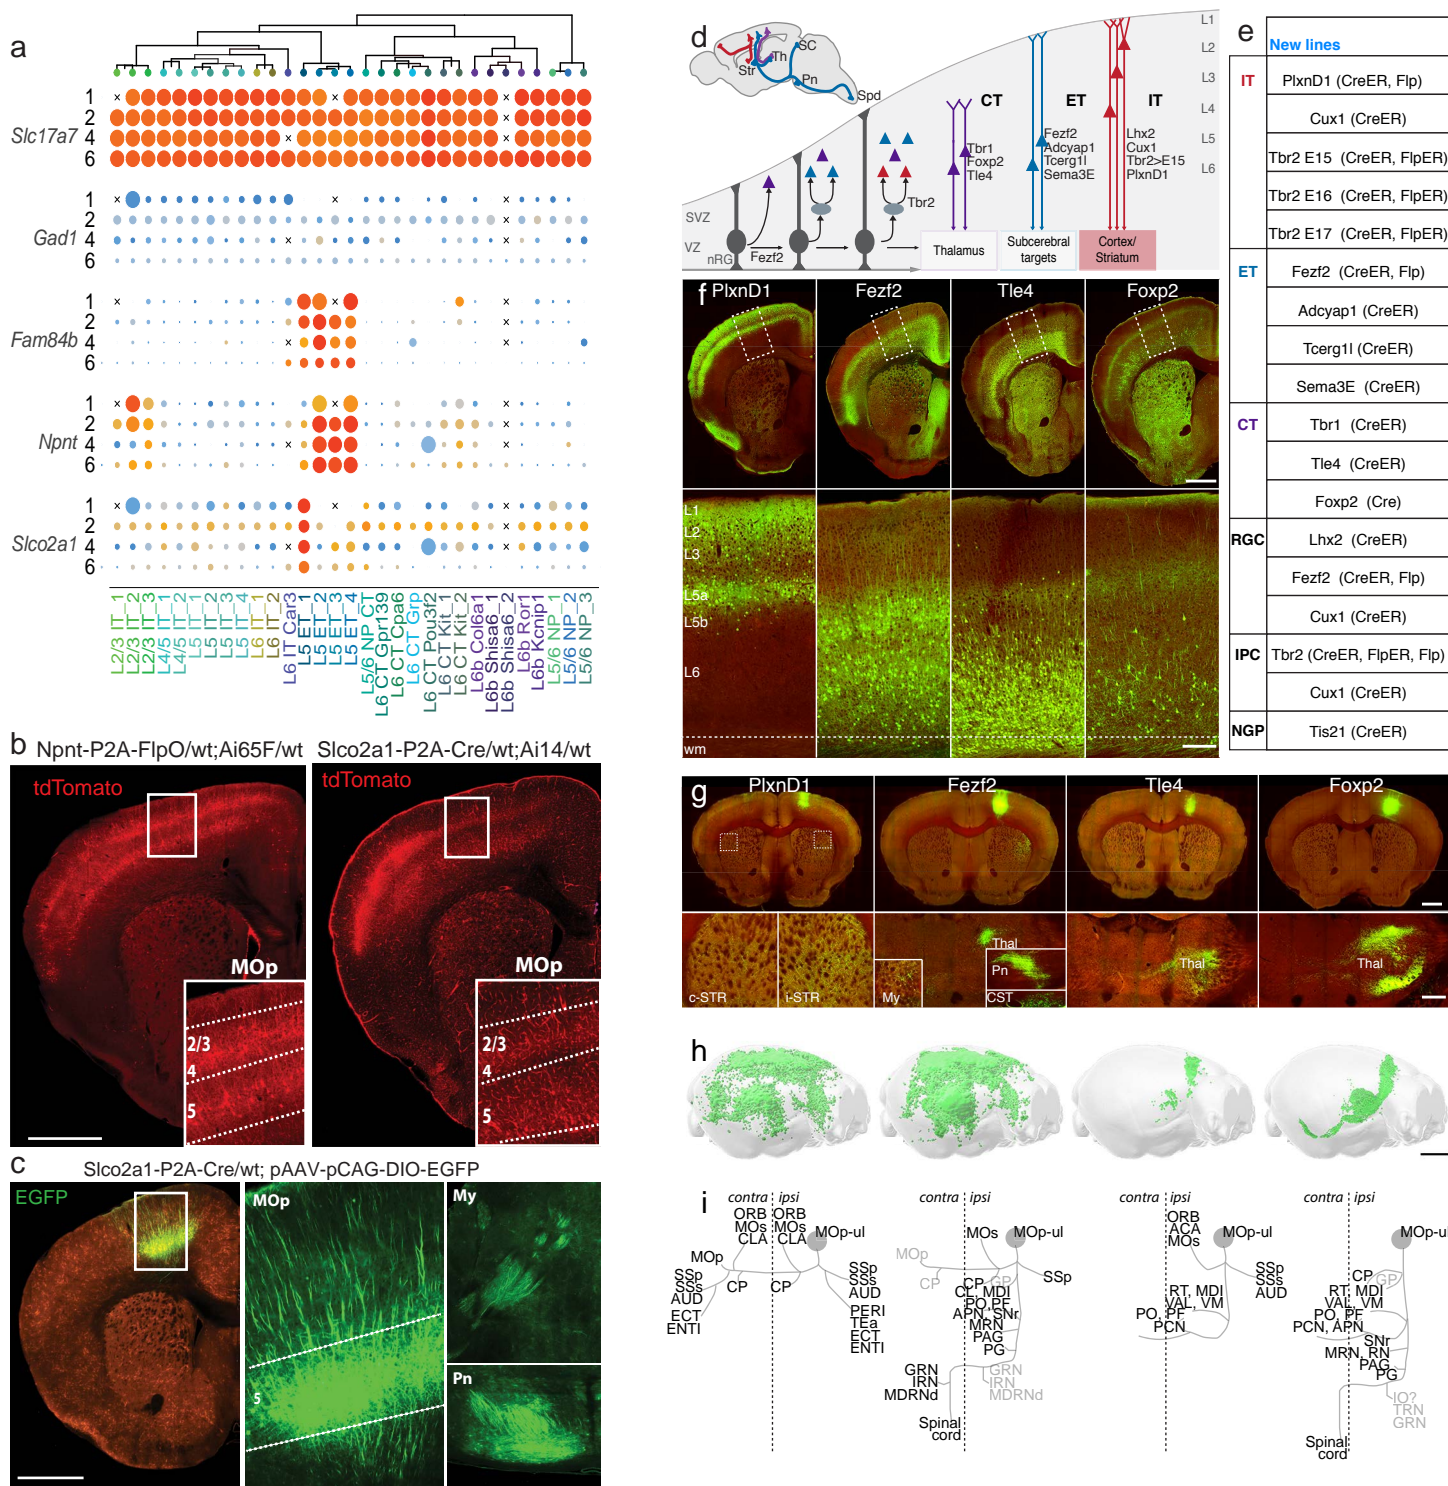

## A multimodal cell census and atlas of the mammalian primary motor cortex

709 **Figure 7. Genetic tools for targeting cortical glutamatergic projection neuron types. a,**  
710 Dendrogram of excitatory cells types within the MOp transcriptomic taxonomy followed by the  
711 proportion of cells (dot size) expressing pan-excitatory or -inhibitory marker genes (*Slc17a7* or  
712 *Gad1*), or L5 ET marker genes (*Fam84b*, *Npnt*, and *Slco2a1*). Expression results from four  
713 different single cell RNA-seq platforms are shown: 1: scRNA-seq SMART-Seq; 2: scRNA-seq  
714 10X v3 A; 4: snRNA-seq SMART-Seq; 6: snRNA-seq 10X v3 B<sup>45</sup>. **b,** Representative images of  
715 native tdTomato fluorescence from MOp of *Npnt-P2A-FlpO;Ai65F* and *Slco2a1-P2A-Cre;Ai14*  
716 animals. Reporter expression was observed in L2/3 and L5 neurons with both driver lines and in  
717 the vasculature with only the *Slco2a1* line. **c,** Representative images of native EGFP  
718 fluorescence from MOp, My (medulla), and Pn (pons) in the brain of an *Slco2a1-P2A-Cre*  
719 animal injected in MOp with a Cre-dependent reporter AAV (*pCAG-FLEX-EGFP-WPRE*).  
720 Robust reporter expression in L5 neurons was observed at the injection site (MOp) and in fibers  
721 terminating in My and Pn. **d,** Schematic (upper left panel) depicting several major pyramidal  
722 neuron (PyN) projection classes that mediate intra-telencephalic streams (IT-red; cortical and  
723 striatal) and cortical output channels (ET-blue, CT-purple). Str, striatum; Th, thalamus; SC,  
724 superior colliculus; Spd, spinal cord. Developmental trajectory of PyNs (lower panel) depicting  
725 lineage progression from progenitors to mature PyNs across major laminar and projection types.  
726 Genes used to target progenitor and PyN subpopulations are listed according to their cellular  
727 expression patterns. VZ, ventricular zone; SVZ, subventricular zone. **e,** Table presenting new  
728 gene knockin driver mouse lines targeting PyN progenitors and projection types. RGC, radial  
729 glia cell; IPC, intermediate progenitor cell; NGP, neurogenic progenitor. **f,** Cre recombination  
730 patterns visualized through reporter expression (green) and background autofluorescence (red)  
731 from four driver/reporter lines *PlexinD1-2A-CreER (PlxnD1);Snap25-LSL-EGFP*, *Fezf2-2A-*  
732 *CreER (Fezf2);Ai14*, *Tle4-2A-CreER (Tle4);Snap25-LSL-EGFP* and *Foxp2-IRES-Cre*  
733 *(Foxp2);AAV9-CAG-FLEX-EGFP* (systemic injection). Top row: coronal hemisections  
734 containing MOp. Bottom row: a segment of MOp (dashed lines, top row) with laminar  
735 delineations. *CreER* Tamoxifen (TM) inductions were at P21 and P28. **g,** Anterograde tracing  
736 from PyN subpopulations in MOp. *CreER* drivers were crossed with a *Rosa26-CAG-LSL-Flp*  
737 mouse, and postnatal TM induction to convert to constitutive Flp expression for anterograde  
738 tracing with a Flp-dependent AAV vector expressing EGFP (*AAV8-CAG-fDIO-TVA-EGFP*).  
739 Representative images of native EGFP fluorescence from the MOp injection site (top row) from  
740 cell-type-specific viral vector (green) and background autofluorescence (red) at selected  
741 subcortical projection targets for four driver lines: Th; Str; cerebral peduncle (cp), Pn, My and  
742 corticospinal tract (CST). **h,** Whole-brain three dimensional renderings of axon projections  
743 registered to the CCFv3 for each PyN subpopulation in the MOp cortex (parasagittal view). **i,**  
744 Schematics of main projection targets for each PyN subpopulation. Vertical dashed line indicates  
745 midline; filled circle indicates MOp injection site. Scale bars: hemisections (f & g) and h, 1mm;  
746 bottom row in f, 200 $\mu$ m; bottom row in g, 500 $\mu$ m; h, 2 mm.

747  
748



## A multimodal cell census and atlas of the mammalian primary motor cortex

### 749 **Integrated multimodal characterization reveals L4 IT neurons in MOp**

750 To investigate if our collective multimodal characterization can lead to an integrated  
751 understanding of cell types in MOp, we selected two case studies to demonstrate convergence of  
752 multiple corresponding properties onto specific cell types.

753  
754 Traditionally MOp has been considered an agranular cortical area, defined by the lack of a  
755 cytoarchitectonic layer 4 which usually contains spiny stellate or star pyramid excitatory  
756 neurons. However, a previous study challenged this view and presented evidence that L4 neurons  
757 similar to those typically found in sensory cortical areas also are present in MOp<sup>95</sup>. Here as the  
758 first case study, we used multimodal evidence to confirm the presence of L4-like neurons in  
759 mouse MOp and possibly in primate M1 as well (**Fig. 8**).

760  
761 We first performed a joint clustering (see Methods) and UMAP embedding of all IT cells  
762 (excluding the highly distinct L6 IT Car3 cells) from 11 different mouse molecular datasets,  
763 including 6 sc/snRNA-seq datasets, and the snmC-Seq2, snATAC-Seq, Epi-Retro-Seq,  
764 MERFISH and Patch-seq data (**Fig. 8a**). This resulted in 5 joint clusters, mostly along a  
765 continuous variation axis moving from L2/3 to L4/5 to L5 to L6. The joint clustering enabled  
766 linkage of the cells independently profiled by each individual modality into types -  
767 transcriptomic, epigenomic, spatially resolved transcriptomic, and morpho-electric-  
768 transcriptomic, and cross-correlation of these disparate properties. Consequently, we identified  
769 epigenomic peaks linked to cluster-specific marker genes - *Cux2* for L2/3 IT and L4/5 IT (1),  
770 *Rspo1* for L4/5 IT (1), *Htr2c* for L4/5 IT (2-3), and *Rorb* for L4/5 IT and L5 IT (**Fig. 8b**, cluster  
771 names from SingleCellFusion). MERFISH data also showed that L4/5 IT and L5 IT cells  
772 occupied distinct layers, and the L4/5 IT type expressed *Rspo1* (**Fig. 8c**), a L4 cell type marker in  
773 sensory cortical areas identified in previous studies<sup>15</sup>. Transcriptomic IT types from mouse  
774 corresponded well with those from human and marmoset, but such correspondence was mostly at  
775 main branches or subclass level while significant confusions existed at single cluster level (**Fig.**  
776 **8d**), likely due to the substantial gene expression variation between rodents and primates (**Fig.**  
777 **2**). In particular, mouse L4/5 IT 1 and 2 transcriptomic clusters together corresponded to a set of  
778 5-7 L3-5 IT clusters in human and marmoset.

779  
780 We further compared the L4-like cells in mouse MOp with those from mouse primary visual  
781 cortex (VISp)<sup>15</sup> after co-clustering all the SMART-Seq glutamatergic neurons from both regions  
782 (**Fig. 8e**). In the UMAP representation, L4/5 IT cells in MOp occupied a subspace of the L4 IT  
783 co-cluster defined by the intersection of marker genes *Cux2* and *Rorb*, suggesting that L4-like  
784 cells in MOp are similar to a subset of L4 cells in VISp while the L4 cells in VISp have  
785 additional diversity and specificity.

786  
787 L4-like IT cells in MOp also exhibited morphological features characteristic of traditionally  
788 defined L4 excitatory neurons. From the Patch-seq study<sup>64</sup>, cells from the L4/5 IT\_1 type had no

## A multimodal cell census and atlas of the mammalian primary motor cortex

789 or minimal apical dendrites without tufts in layer 1, in contrast to cells from the neighboring  
790 L2/3 IT, L4/5 IT<sub>2</sub> and L5 IT types which had tufted apical dendrites (**Fig. 8f**). We also obtained  
791 full morphological reconstructions of excitatory neurons with their somas located in L2, L3 or  
792 L4 in MOp or the neighboring secondary motor area (MOs) from fMOST imaging of *Cux2*-  
793 *CreERT2*;*Ai166* mice<sup>68,80</sup>. As shown in **Fig. 8b**, *Cux2* is a specific marker gene for L2/3 IT and  
794 L4/5 IT<sub>1</sub> types. These full reconstructions allowed us to examine, in addition to dendritic  
795 morphologies, the full extent of both local and long-range axon projections. The MOp/MOs  
796 neurons with somas in putative L4 (between L2/3 and L5) exhibited two local morphological  
797 features characteristic of L4 neurons found in sensory cortical areas (**Fig. 8g**). First, the dendrites  
798 of the L4 neurons were simple and untufted whereas those of the L2 and L3 neurons all had  
799 extensive tufts. Second, the local axons of L4 neurons mostly projected upward into L2/3 in  
800 addition to collateral projections; on the contrary, the local axons of L2 and L3 neurons mostly  
801 projected downward, reaching into L5. These local projection patterns are consistent with the  
802 canonical feedforward projections within a cortical column observed in somatosensory and  
803 visual cortices, with the first feedforward step being from L4 to L2/3 and the second feedforward  
804 step from L2/3 to L5<sup>96</sup>. We also found that the MOp/MOs L4 neurons had intracortical long-  
805 range projections like the L2 and L3 neurons (**Fig. 6d**).

806  
807 Taken together, our multimodal characterization demonstrates that mouse MOp indeed has  
808 excitatory neurons with L4 characteristics, namely, occupying a specific layer between L2/3 and  
809 L5, having simple and untufted dendrites and upward-projecting local axons, belonging to a  
810 transcriptomic type (L4/5 IT<sub>1</sub>) marked by a L4-specific gene *Rspo1* as well as the intersection  
811 of a L2/3/4-specific gene *Cux2* and a L4/5-specific gene *Rorb*, and having corresponding  
812 epigenomic regulatory elements. L4-like neurons may also exist in human and marmoset M1.

813

814

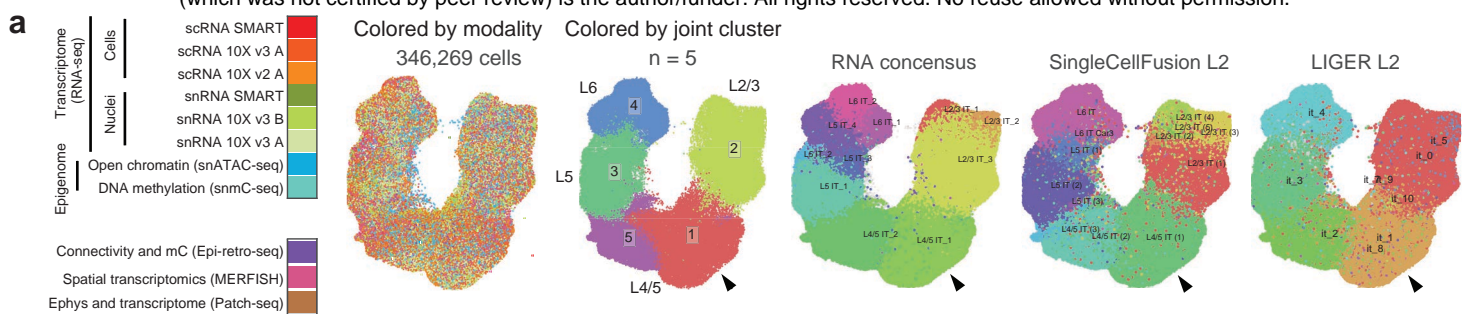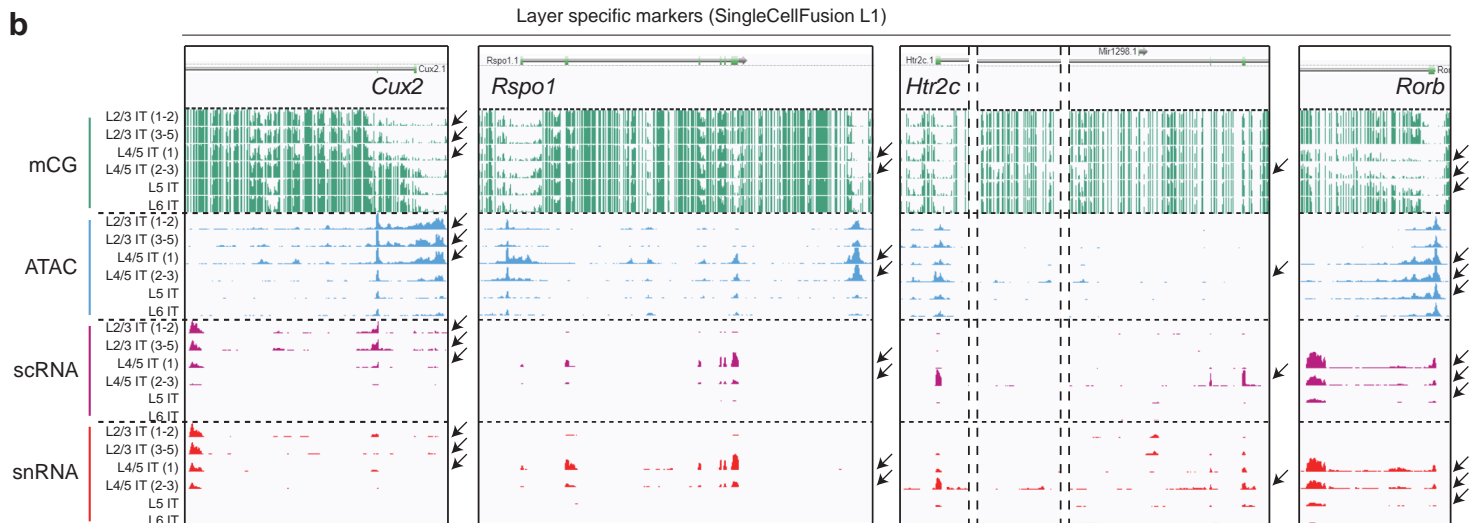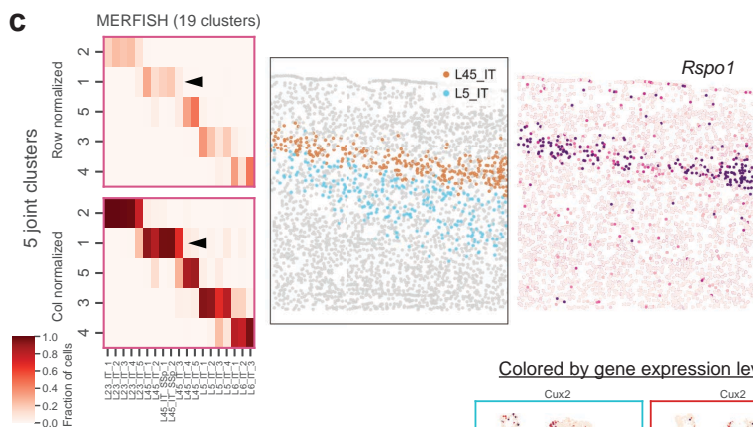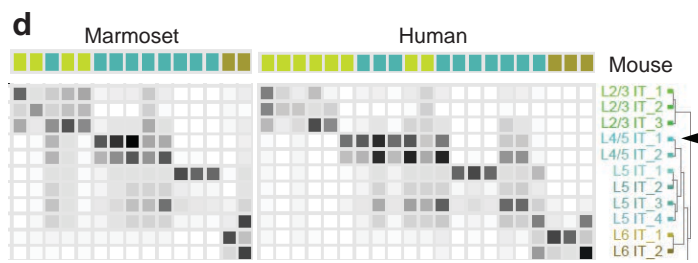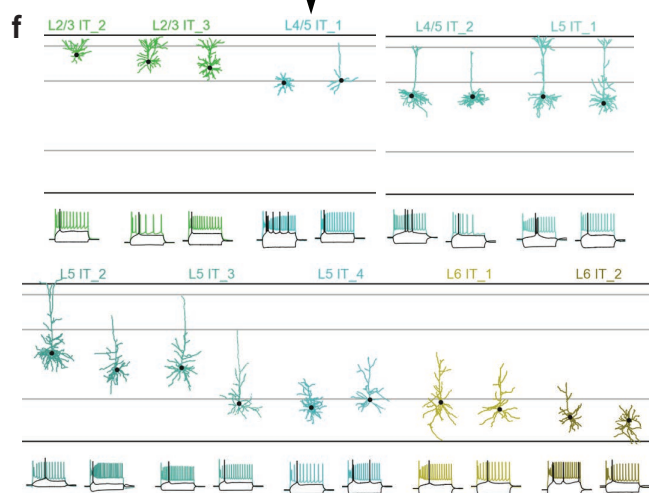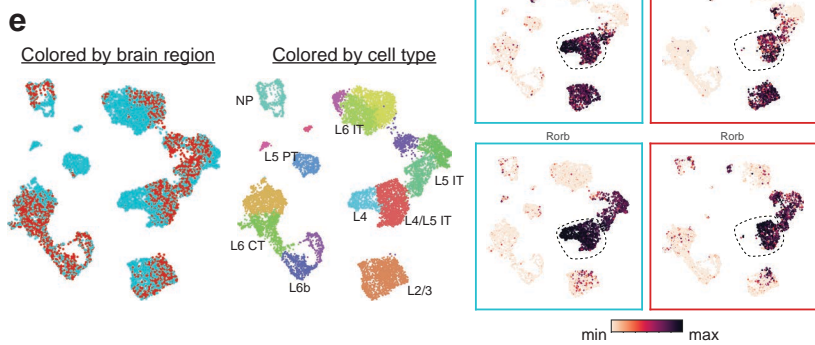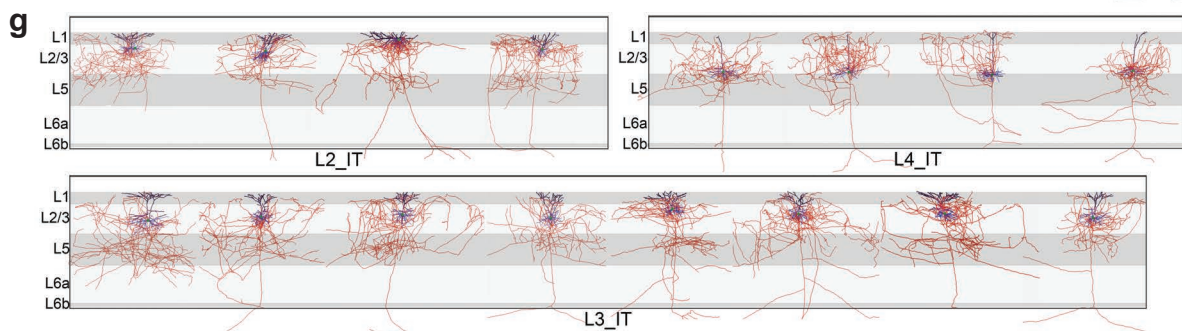

## A multimodal cell census and atlas of the mammalian primary motor cortex

815 **Figure 8. Existence of L4 excitatory neurons in MOp.** **a**, UMAP embedding of IT cells from  
816 11 datasets. Cells are colored by modalities, by cluster identities from the 11-dataset joint  
817 clustering, and by cluster identities generated from other consensus clustering methods in <sup>45</sup>. **b**,  
818 Genome browser of layer-specific gene markers - from L2/3 to L5 - across IT cell types as  
819 defined in <sup>45</sup> (SingleCellFusion L1). Arrows indicate cell types with correlated transcription and  
820 epigenomic signatures of the specific marker gene. **c**, MERFISH IT clusters correspond well  
821 with the above joint clusters from **a** (confusion matrices, left panel) and reveal a L4 specific  
822 cluster (L45\_IT) distinctly separated from the L5\_IT cluster (middle panel) and marked by gene  
823 *Rspo1* (right panel). **d**, Correspondence between mouse and human or marmoset transcriptomic  
824 IT types. **e**, UMAP embedding of excitatory cells from MOp (scRNA\_SMART) <sup>45</sup> and VISp <sup>15</sup>  
825 show that L4 excitatory cells from MOp correspond to a subset of L4 excitatory cells from VISp.  
826 Cells are colored by brain regions (MOp, red; VISp, blue), by cell types, and by expression  
827 levels (log<sub>10</sub>(TPM+1)) of marker genes *Cux2* and *Rorb*. **f**, Dendritic morphologies and spiking  
828 patterns of representative Patch-seq cells from all IT types (L2/3 to L6). Arrow heads in **a**, **c**, **d**  
829 and **f** indicate the L4/5 IT 1 type. **g**, Local dendritic and axonal morphologies of fully  
830 reconstructed IT neurons with somas located in L2, L3 and L4. Black, apical dendrites. Blue,  
831 basal dendrites. Red, axons.

832  
833

834 **Integrated multimodal characterization of two L5 ET projection neuron types in MOp**  
835 Previous studies had shown that in the mouse anterolateral motor (ALM) cortex, part of MOs, L5  
836 ET neurons have two transcriptomically distinct projection types that may carry out different  
837 motor-control functions; the thalamus projecting type may be involved in movement planning  
838 whereas the medulla (MY) projecting type may be involved in initiation of the movement <sup>15,86</sup>.  
839 Here as the second case study, through integrated multimodal characterization we demonstrate  
840 that L5 ET neurons in MOp can also be divided into MY-projecting and non-MY-projecting  
841 types.

842

843 As shown in the companion paper <sup>45</sup>, we mapped the mouse MOp L5 ET transcriptomic types to  
844 the previous VISp-ALM transcriptomic taxonomy <sup>15</sup>. From this mapping we found that the MOp  
845 L5 ET 1 type corresponded to the ALM MY-projecting type marked by *Slco2a1*, whereas MOp  
846 L5 ET 2-4 types corresponded to the ALM thalamus-projecting types with L5 ET 2/3 marked by  
847 *Hpgd* and L5 ET 4 by *Npsr1*. Here we show such distinction is consistent across all molecular  
848 datasets (**Fig. 9a-b**). Mouse transcriptomic type L5 ET 1 corresponded well with both integrated  
849 molecular type SCF L5 ET (1) and MERFISH clusters L5\_ET\_5, as well as with a L5 ET  
850 transcriptomic type from human and marmoset. Mouse transcriptomic types L5 ET 2-4  
851 corresponded with integrated molecular types SCF L5 ET (2-3), MERFISH clusters L5\_ET\_1-4,  
852 and two L5 ET transcriptomic types from human and marmoset. The laminar distribution of  
853 these two groups was revealed by MERFISH, with cells in L5\_ET\_1-4 clusters intermingled in  
854 the upper part of L5 and cells in L5\_ET\_5 located distinctly in lower L5 (**Fig. 9c**). The two

## A multimodal cell census and atlas of the mammalian primary motor cortex

855 groups were further distinguished by epigenomic peaks associated with specific marker genes,  
856 *Slco2a1* for SCF L5 ET (1) type and *Npnt* for SCF L5 ET (2-3) types (**Fig. 9d**), providing  
857 validity to the two novel transgenic driver lines we generated, *Slco2a1-P2A-Cre* and *Npnt-P2A-*  
858 *FlpO* (**Fig. 7**).

859  
860 Epi-Retro-Seq study (see above) revealed more complex long-range projection patterns among  
861 the 6 epigenetic L5-ET clusters identified, with cluster 0 predominantly projecting to MY while  
862 other clusters having variable and less specific projection patterns (clusters 2 and 3 also  
863 containing MY-projecting cells) (**Fig. 5g**). We co-clustered the L5 ET cells from the Epi-Retro-  
864 Seq data and the snRNA-seq 10x v3 B data <sup>45</sup> to investigate the correspondence of Epi-Retro-Seq  
865 clusters and projection targets with transcriptomic clusters (**Fig. 9e**). We found that the  
866 consensus transcriptomic cluster L5 ET 1 corresponds to Epi-Retro-Seq clusters 0, 2 and 3, all of  
867 which contain MY-projecting neurons. On the other hand, transcriptomic clusters L5 ET 2-4  
868 correspond to Epi-Retro-Seq clusters 1, 4 and 5, which do not contain MY-projecting neurons.  
869 Thus, all MY-projecting neurons are mapped to transcriptomic type L5 ET 1, while neurons in  
870 the L5 ET 2-4 types do not project to MY.

871  
872 Anterograde tracing in *Slco2a1-P2A-Cre* mice demonstrated predominant projection from  
873 *Slco2a1*-labeled neurons in MOp to MY (**Fig. 7**). We identified multiple full morphology  
874 reconstructions of MOp L5 ET neurons from fMOST imaging of *Fezf2-CreER;Ai166* and *Pvalb-*  
875 *T2A-CreERT2;Ai166* transgenic mice <sup>68</sup>. These reconstructions could be clearly separated into a  
876 MY-projecting group and a non-MY-projecting group (**Fig. 9g**), though they were not directly  
877 linked to transcriptomic types yet. Both groups of cells had thick-tufted dendrites that were  
878 similar to each other (**Fig. 9g**). Consistent with this, Patch-seq cells corresponding to  
879 transcriptomic types L5 ET 1-4 also were indistinguishable from each other by their dendritic  
880 morphologies (**Fig. 9f**).

881  
882 Altogether, our integrated multimodal characterization identified two major types of mouse L5  
883 ET projection neurons, MY-projecting and non-MY-projecting, with distinct gene markers,  
884 epigenomic elements, laminar distribution, and corresponding types in human and marmoset.

885  
886

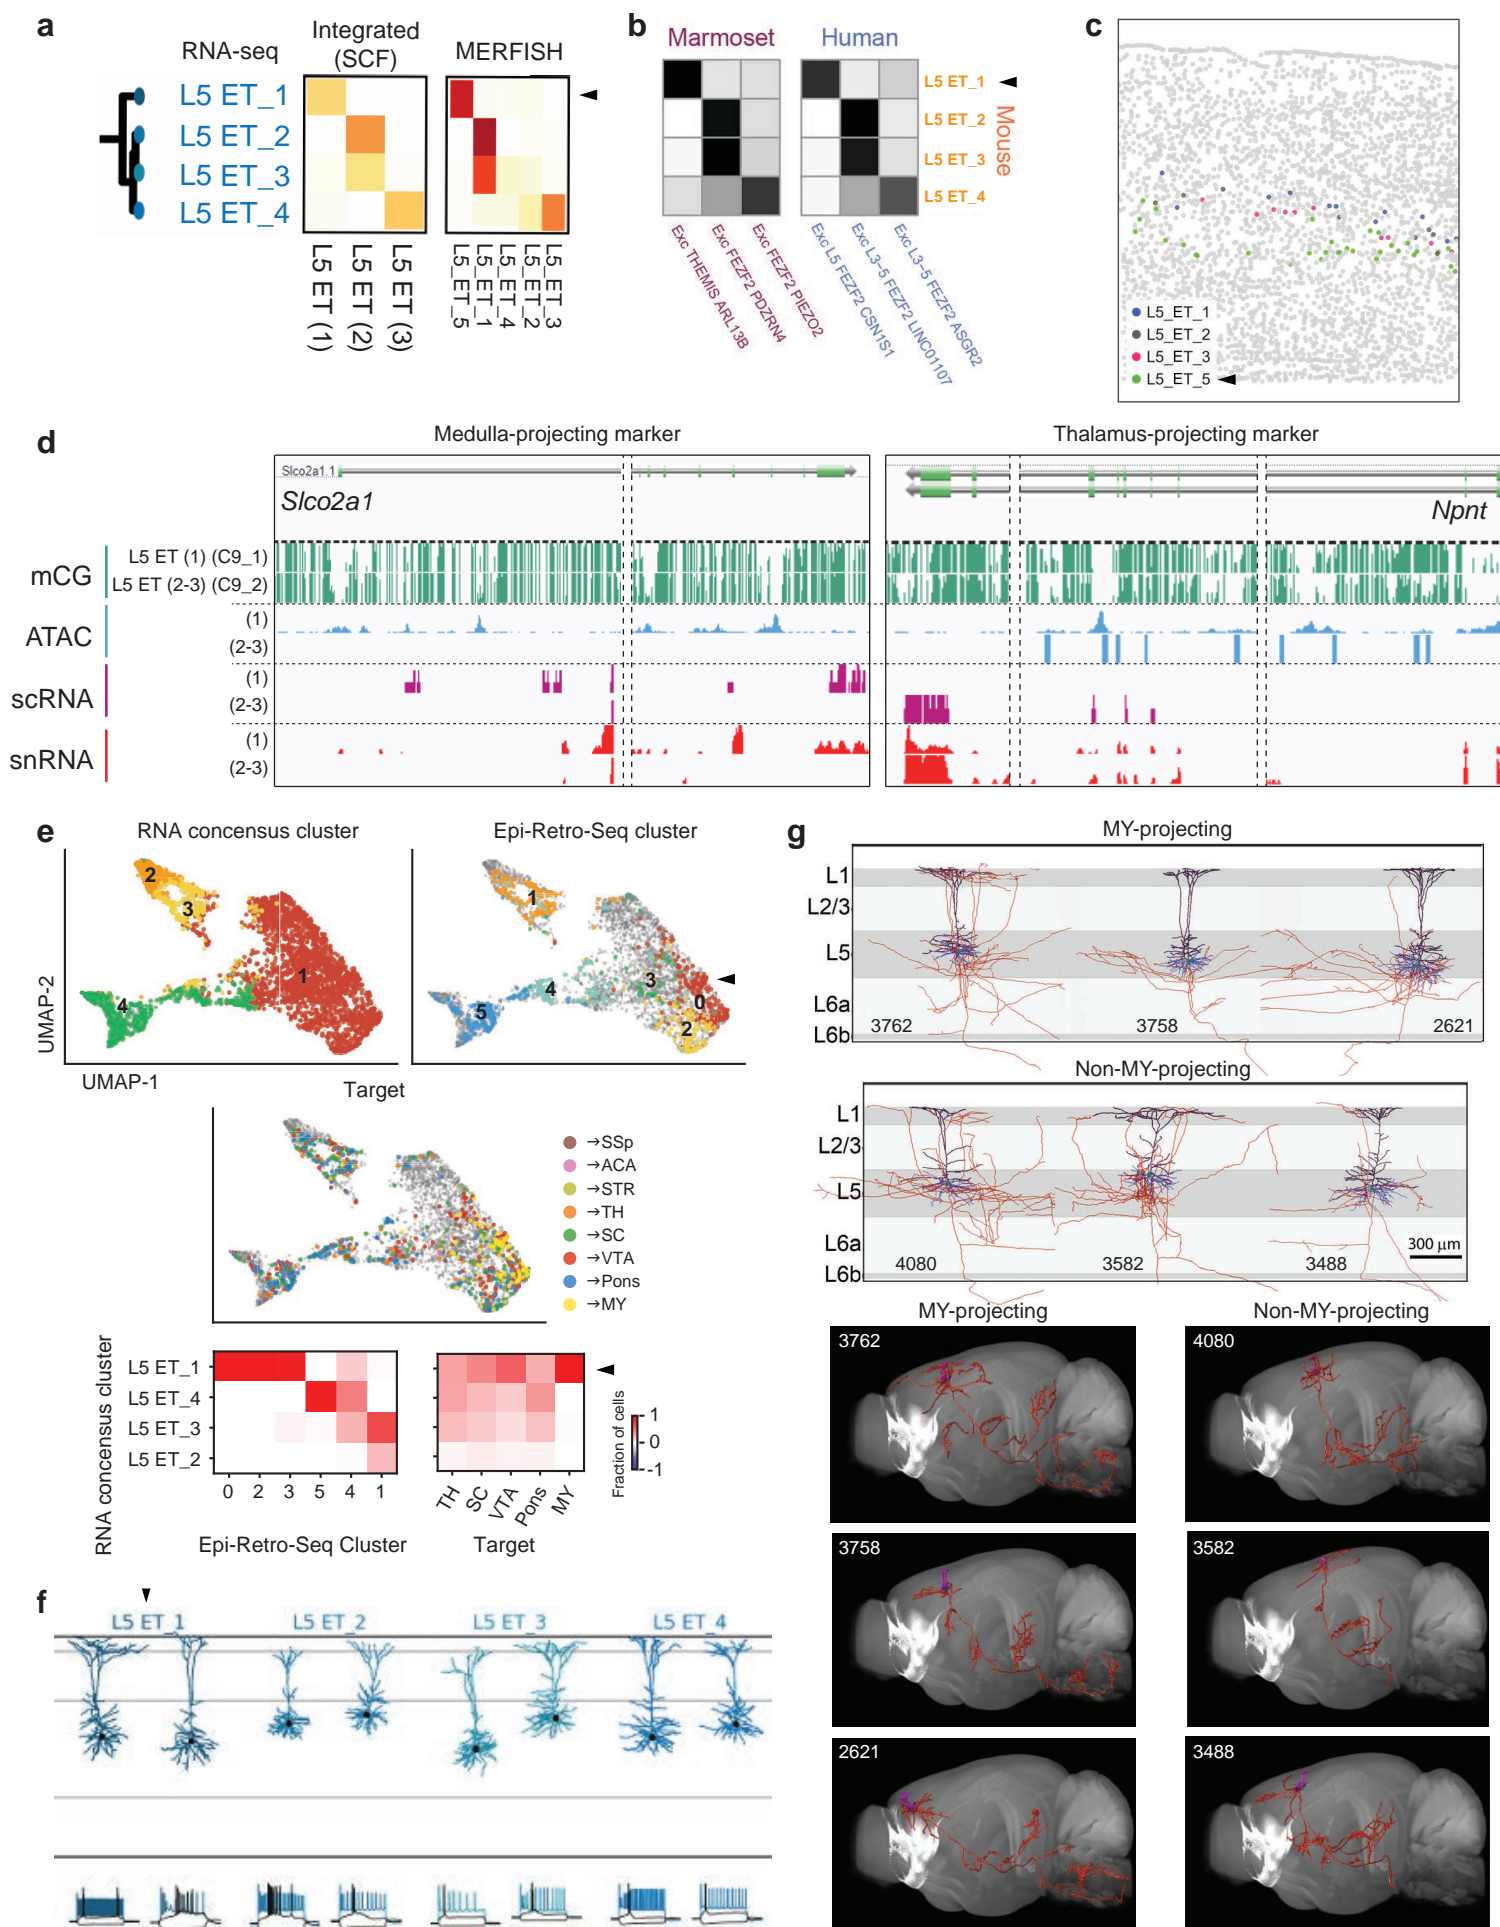

## A multimodal cell census and atlas of the mammalian primary motor cortex

887 **Figure 9. Two distinct L5 ET projection neuron types in MOp.** **a**, Within the mouse L5 ET  
888 subclass, good correspondence is observed between the 4 transcriptomic clusters and the 3  
889 integrated molecular clusters (SingleCellFusion) or the 5 MERFISH clusters. **b**, Within the L5  
890 ET subclass, the 4 mouse transcriptomic clusters correspond well with the 3 transcriptomic  
891 clusters in either human or marmoset. **c**, In MERFISH, cells belonging to the L5\_ET\_1-4  
892 clusters co-occupy the upper L5, whereas L5\_ET\_5 cells are distinctly located in lower L5. **d**,  
893 Genome browser of gene markers between the MY-projecting (*Slco2a1*) and the non-MY-  
894 projecting (*Npnt*) L5 ET neurons. **e**, Integration panels between L5 ET Epi-Retro-Seq clusters  
895 and consensus transcriptomic clusters. The transcriptomic dataset used here is snRNA 10x v3 B,  
896 which has the largest number of L5 ET cells (>4k). Top panels, UMAP plots colored by  
897 consensus transcriptomic clusters, Epi-Retro-Seq clusters and projection targets (retrograde  
898 tracer injection sites). Bottom panels, confusion matrices between consensus transcriptomic  
899 clusters and Epi-Retro-Seq clusters or major projection targets. The heatmaps are column-wise  
900 normalized rather than row-wise to avoid misleading interpretation, since the number of cells  
901 sampled from each projection may differ a lot in Epi-Retro-Seq. **f**, Dendritic morphologies and  
902 spiking patterns of representative Patch-seq cells corresponding to the 4 mouse transcriptomic L5  
903 ET types. **g**, Local dendritic and axonal morphologies (upper panels) and brain-wide axon  
904 projections (lower panels) of representative fully-reconstructed L5 ET neurons, separated into  
905 MY-projecting and non-MY-projecting types. Black, apical dendrites. Blue, basal dendrites. Red,  
906 axons.

### 909 **An integrated synthesis of multimodal features of cell types in the primary motor cortex**

910 As the conclusion of this series of studies from BICCN, we present an overview and integrated  
911 synthesis of the knowledge gained in constructing a multimodal census and atlas of cell types in  
912 the primary motor cortex of mouse, marmoset and human (**Fig. 10**). A critical aspect of our  
913 studies is that this synthesis is only made possible by the systematic integrative computational  
914 analyses across multiple transcriptomic and epigenomic data types that connect a diverse range  
915 of cellular features together at cell subclass or type level to allow mutual correlation.

916  
917 This integrated synthesis uses the mouse MOp consensus transcriptomic taxonomy (containing  
918 18 subclasses and 116 clusters/types)<sup>45</sup> as the anchor (**Fig. 10**) because it was derived from the  
919 largest and deepest datasets and was the reference taxonomy for nearly all the cross-modality and  
920 cross-species comparisons. Correspondence matrices between the different molecular modalities  
921 show that the mouse MERFISH-based spatial transcriptomic taxonomy (95 clusters)<sup>54</sup>, the  
922 integrated mouse molecular taxonomies combining transcriptomic and epigenomic data using  
923 either SingleCellFusion (SCF, 56 neuronal clusters) or LIGER (71 clusters) approach<sup>45</sup>, and the  
924 human and marmoset transcriptomic taxonomies (127 and 94 clusters, respectively)<sup>48</sup> all aligned  
925 largely consistently with the mouse consensus transcriptomic taxonomy. Such alignment  
926 convincingly demonstrates that cell types in a given brain region can be consistently described

## A multimodal cell census and atlas of the mammalian primary motor cortex

927 by different types of characterization. At the same time, it should also be noted that the  
928 alignments are not perfect and disagreements do exist at the individual cluster level (which is  
929 most pronounced in cross-species comparisons), suggesting that differential variations exist in  
930 different data types and consistency, in particular that across species, may be more appropriately  
931 described at an intermediate level of granularity.

932

933 In this integrated synthesis, we can further assign additional attributes to the molecularly defined  
934 cell types (**Fig. 10**). Based on Patch-seq<sup>64</sup>, Retro-seq (e.g. Epi-Retro-Seq<sup>79</sup>), Retro-MERFISH  
935<sup>54</sup>, and axon projection<sup>68,69</sup> studies, we relate many transcriptomic neuronal types or subclasses  
936 to cortical neuron types traditionally defined by electrophysiological, morphological and  
937 connectional properties, thus bridging our cell type census with historical and community  
938 knowledge. We provide the relative proportion of each cell type within the mouse MOp using  
939 either snRNA-seq or MERFISH data. The MERFISH data also identify the spatial distribution  
940 pattern of each cell type<sup>54</sup>. For example, we found that excitatory or inhibitory neuron types are  
941 distributed along the cortical depth, with many individual types adopting narrow cortical-depth  
942 distributions, often occupying predominantly a single layer or a sublayer, and related types (e.g.  
943 the L2/3-6 IT excitatory types) can display a gradual transitioning across cortical depths/layers.  
944 On the other hand, non-neuronal cell types are either distributed across all layers or specific to  
945 layer 1 or the white matter (WM). Patch-seq data also provided the cortical depth positions of a  
946 variety of neuronal cell types.

947

948 Finally, we demonstrate the possibility to elucidate gene regulatory mechanisms by discovering  
949 candidate cis-regulatory elements (cCREs) as well as master transcription factors (TFs) specific  
950 to neuronal subclasses by mining the combined mouse MOp transcriptomic and epigenomic  
951 datasets to access both RNA expression of genes and accessibility or DNA methylation of  
952 cCREs from the same cell clusters.

953

954 For example, we found 7,245 distal cCRE (>1 kbp from transcriptional start site)-gene pairs in  
955 neuronal cells in MOp that showed positive correlation between accessibility at the 6,280 cCREs  
956 and expression levels of 2,490 putative target genes (see Methods, and companion papers<sup>45,52</sup>).  
957 We grouped these putative enhancers into modules based on accessibility across cell clusters  
958 (**Extended Data Fig. 2**). 76% of putative enhancers showed remarkable sub-type specific  
959 chromatin accessibility and were enriched for lineage-specific transcription factors, while 24% of  
960 putative enhancers (1,527) were widely accessible and linked to genes expressed across neuronal  
961 cell clusters with highest expression levels in Glutamatergic neurons (module M1, **Extended**  
962 **Data Fig. 2b**). Putative enhancers in this module showed enrichment of sequence motifs  
963 recognized by transcription factors CTCF, MEF2 indicating a more general rule of these factors  
964 in establishing neuronal gene regulatory programs (**Extended Data Fig. 2c**). Meanwhile, other  
965 modules (M2 to M14) of enhancer-gene pairs were active in a subclass-specific manner  
966 (**Extended Data Fig. 2b-d**). Thus, using this approach we have identified a large number of



## A multimodal cell census and atlas of the mammalian primary motor cortex

967 enhancer-gene pairs for each subclass of neurons (**Fig. 10**). These enhancers can be potentially  
968 used to generate cell type-targeting viral tools.

969

970 Similarly, we identified transcription factors showing cell-type specificity supported by both  
971 RNA expression and DNA binding motif enrichment in hypo-CG-DMR of MOp subclasses (see  
972 Methods, and companion papers<sup>45,50</sup>) (**Extended Data Fig. 3**). Combining these two  
973 orthologous pieces of evidence identified many well-studied TFs in embryonic precursors, such  
974 as the Dlx family members for pan-inhibitory neurons, and Lhx6 and Mafk for MGE derived  
975 inhibitory neurons. We further identified many additional TFs with more restricted patterns in  
976 specific subclasses, such as Rfx3 and Rreb1 (in L2/3 IT), Atoh7 and Rorb (in L4/5 IT), Pou3  
977 family members (in L5 ET), Etv1 (in L5/6 NP), Esrr family members (in Pvalb), and Arid5a (in  
978 Lamp5). The agreement of these two modalities suggests a requirement of TF regulatory activity  
979 in mature neurons to maintain aspects of cell phenotypes and identity.

980

981 In summary, our comprehensive multimodal characterization of cell types from the MOp region  
982 demonstrates that transcriptomic, epigenomic, spatial, physiological, morphological and  
983 connectional properties can be all correlated and integrated together, to reveal organizational  
984 principles of brain cell types and bridge molecular, structural and functional studies in different  
985 modalities and across species.

986

987

Mouse consensus transcriptomic taxonomy

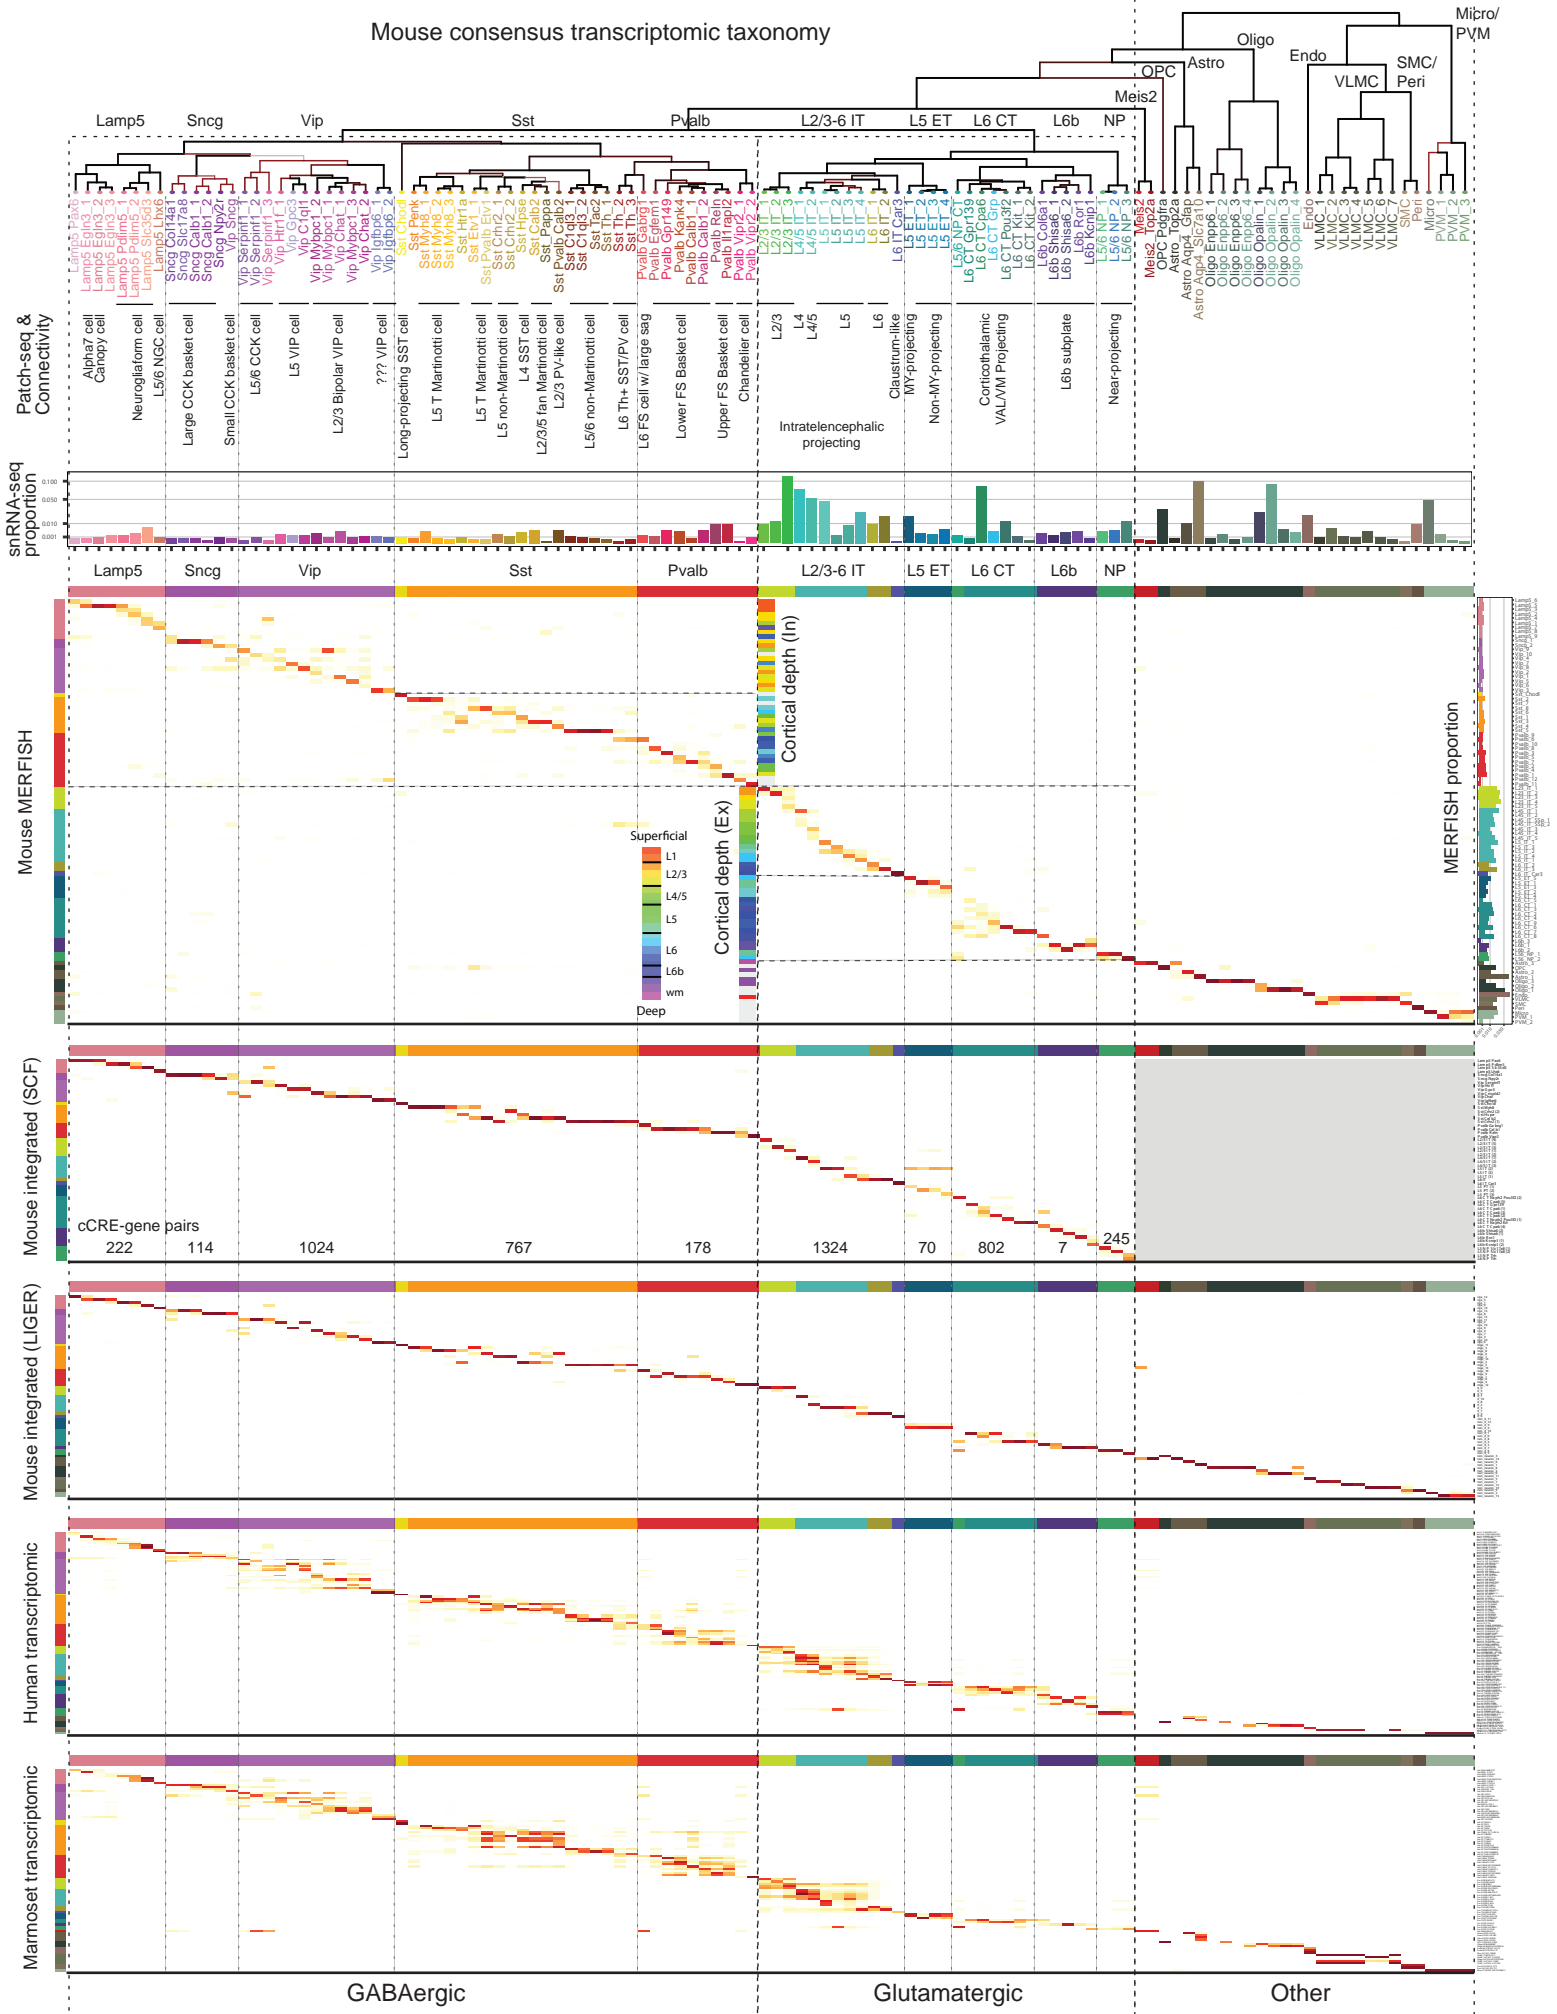

## A multimodal cell census and atlas of the mammalian primary motor cortex

988 **Figure 10. An integrated multimodal census and atlas of cell types in the primary motor**  
989 **cortex of mouse, marmoset and human.** The mouse MOp consensus transcriptomic taxonomy  
990 at the top is used to anchor cell type features in all the other modalities. Subclass labels are  
991 shown above major branches and cluster labels are shown below each leaf node. Confusion  
992 matrices show the correspondence between the mouse MOp transcriptomic taxonomy with those  
993 derived from other molecular datasets, including mouse MERFISH, the integrated mouse  
994 molecular taxonomies by SingleCellFusion (SCF) or LIGER, and the human and marmoset  
995 transcriptomic taxonomies. Using Patch-seq and connectivity studies, many transcriptomic  
996 neuronal types or subclasses are annotated and correlated with known cortical neuron types  
997 traditionally defined by electrophysiological, morphological and connectional properties. (Note:  
998 no Patch-seq data were collected for the Vip cells labeled by question marks.) The relative  
999 proportions of all cell types within the mouse MOp are calculated from either the snRNA-seq  
1000 10x v3 B (horizontal bar graph) or MERFISH (vertical bar graph to the right of the MERFISH  
1001 matrix) dataset. Median cortical depth position of each cell type derived from MERFISH is  
1002 shown as color-coded bar graphs at the center of the MERFISH matrix, colored according to the  
1003 rainbow scheme from superficial (red) to deep (purple) layers as shown on the left. Cell types  
1004 with dispersed distributions spanning relatively large ranges of cortical depth are colored in grey.  
1005 The numbers of cCRE-gene pairs in modules corresponding to neuronal subclasses identified by  
1006 Cicero from the scRNA-seq and snATAC-seq datasets are shown at the bottom of the SCF  
1007 matrix.  
1008  
1009

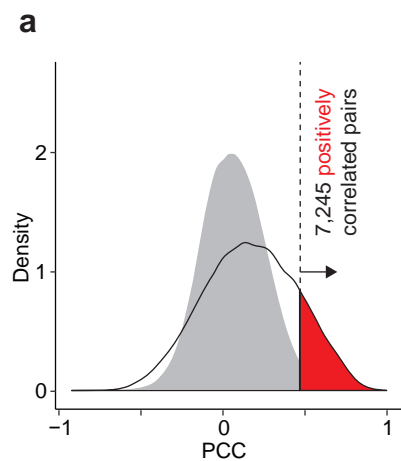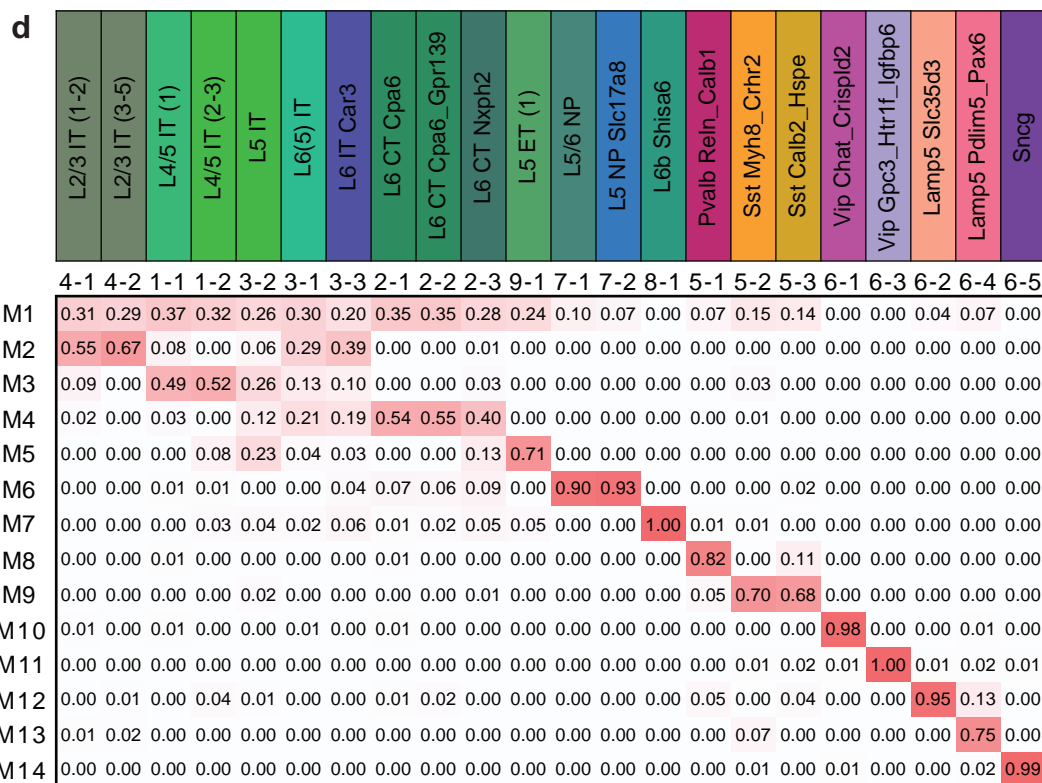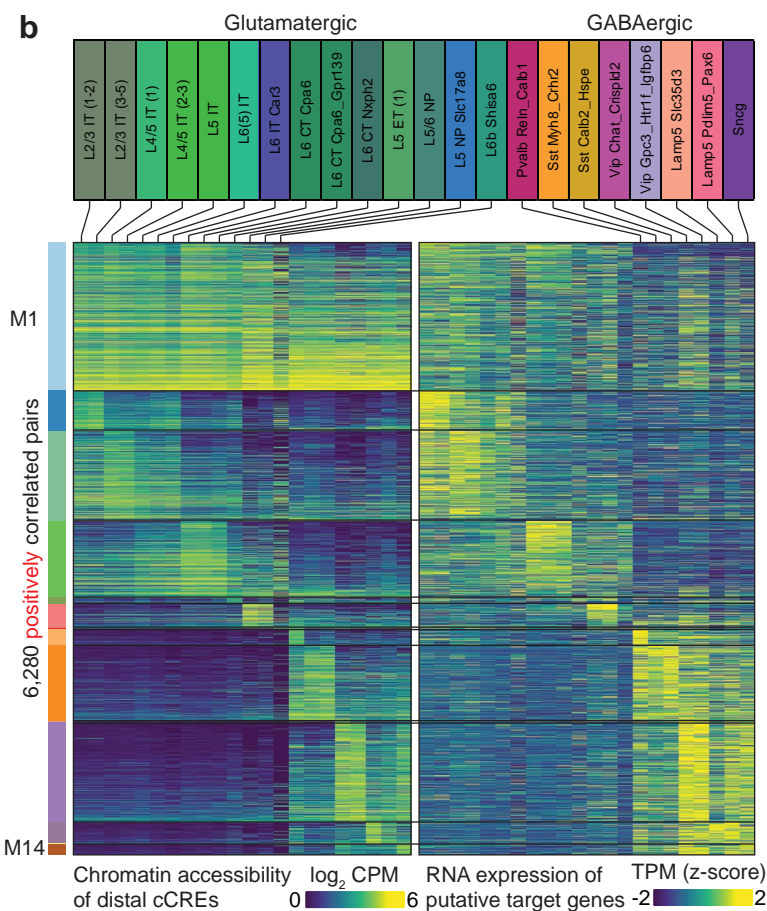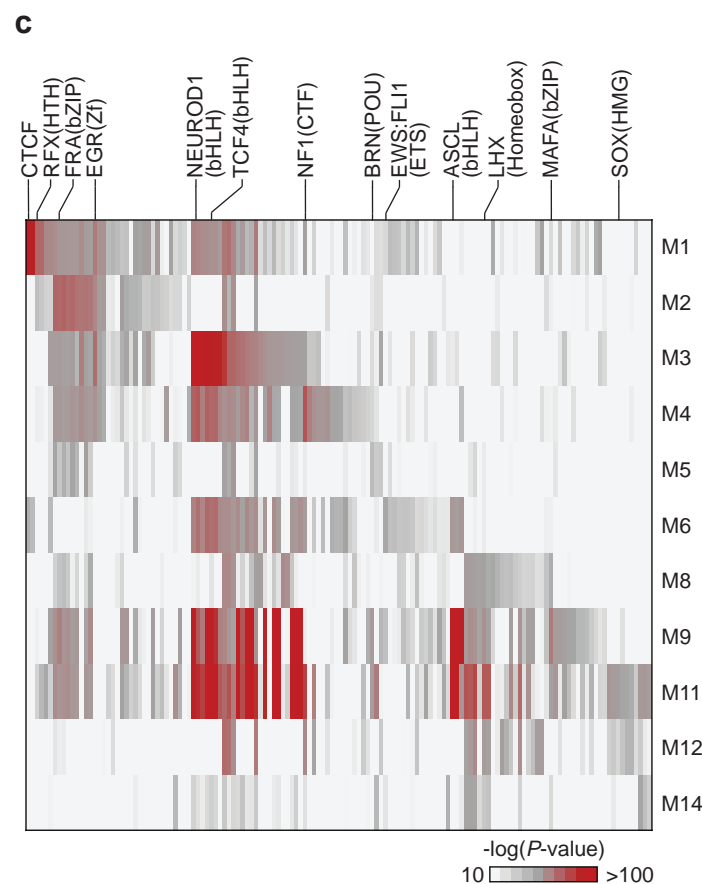

## A multimodal cell census and atlas of the mammalian primary motor cortex

1010 **Extended Data Figure 2.** Characterization of putative enhancer-gene pairs. **a**, Detection of  
1011 putative enhancer-gene pairs. 7,245 pairs of positively correlated cCRE and genes (highlighted in  
1012 red) were identified using an empirically defined significance threshold of  $FDR < 0.01$ . Grey  
1013 filled curve shows the distribution of PCC for randomly shuffled cCRE-gene pairs. **b**, Heatmap  
1014 of chromatin accessibility of 6,280 putative enhancers across joint cell clusters (left) and  
1015 expression of 2,490 target genes (right). Note genes are displayed for each putative enhancer  
1016 separately. CPM: counts per million, TPM: transcripts per million. **c**, Enrichment of known  
1017 transcription factor motifs in distinct enhancer-gene modules. Displayed are known motifs from  
1018 HOMER with enrichment  $-\log p\text{-value} > 5$ . In module M1, de novo motif analysis of putative  
1019 enhancers in this module showed enrichment of sequence motif recognized by transcription  
1020 factors CTCF, MEF2. CTCF is a widely expressed DNA binding protein with a well-established  
1021 role in transcriptional insulation and chromatin organization, but recently it was also reported  
1022 that CTCF can promote neurogenesis by binding to promoters and enhancers of related genes. In  
1023 the L2/3 IT selective module M2, the putative enhancers were enriched for the binding motif for  
1024 Zinc-finger transcription factor EGR, a known master transcriptional regulator of excitatory  
1025 neurons<sup>97</sup>. In the Pvalb selective module M8, the putative enhancers were enriched for sequence  
1026 motifs recognized by the MADS factor MEF2, which is associated with regulating cortical  
1027 inhibitory and excitatory synapses and behaviors relevant to neurodevelopmental disorders<sup>98</sup>. **d**,  
1028 Heatmap shows the weights of each joint cell cluster in each module, which were derived from  
1029 the coefficient matrix. The values of each column are scaled (0–1).

1030  
1031  
1032 **Extended Data Figure 3.** Dot plot illustrating the RNA expression levels (red) and hypo-CG-  
1033 DMR motif enrichments (blue) of transcription factors (TFs) in mouse MOp subclasses. The size  
1034 and color of red dots indicate the proportion of expressing cells and the average expression level  
1035 in each subclass, respectively. The size and color of blue dots indicate adjusted P-value and  
1036  $\log_2(\text{Odds Ratio})$  of motif enrichment analysis, respectively.

1037  
1038

# Transcription Factors RNA Expression And Motif Enrichment in MOP Subclasses

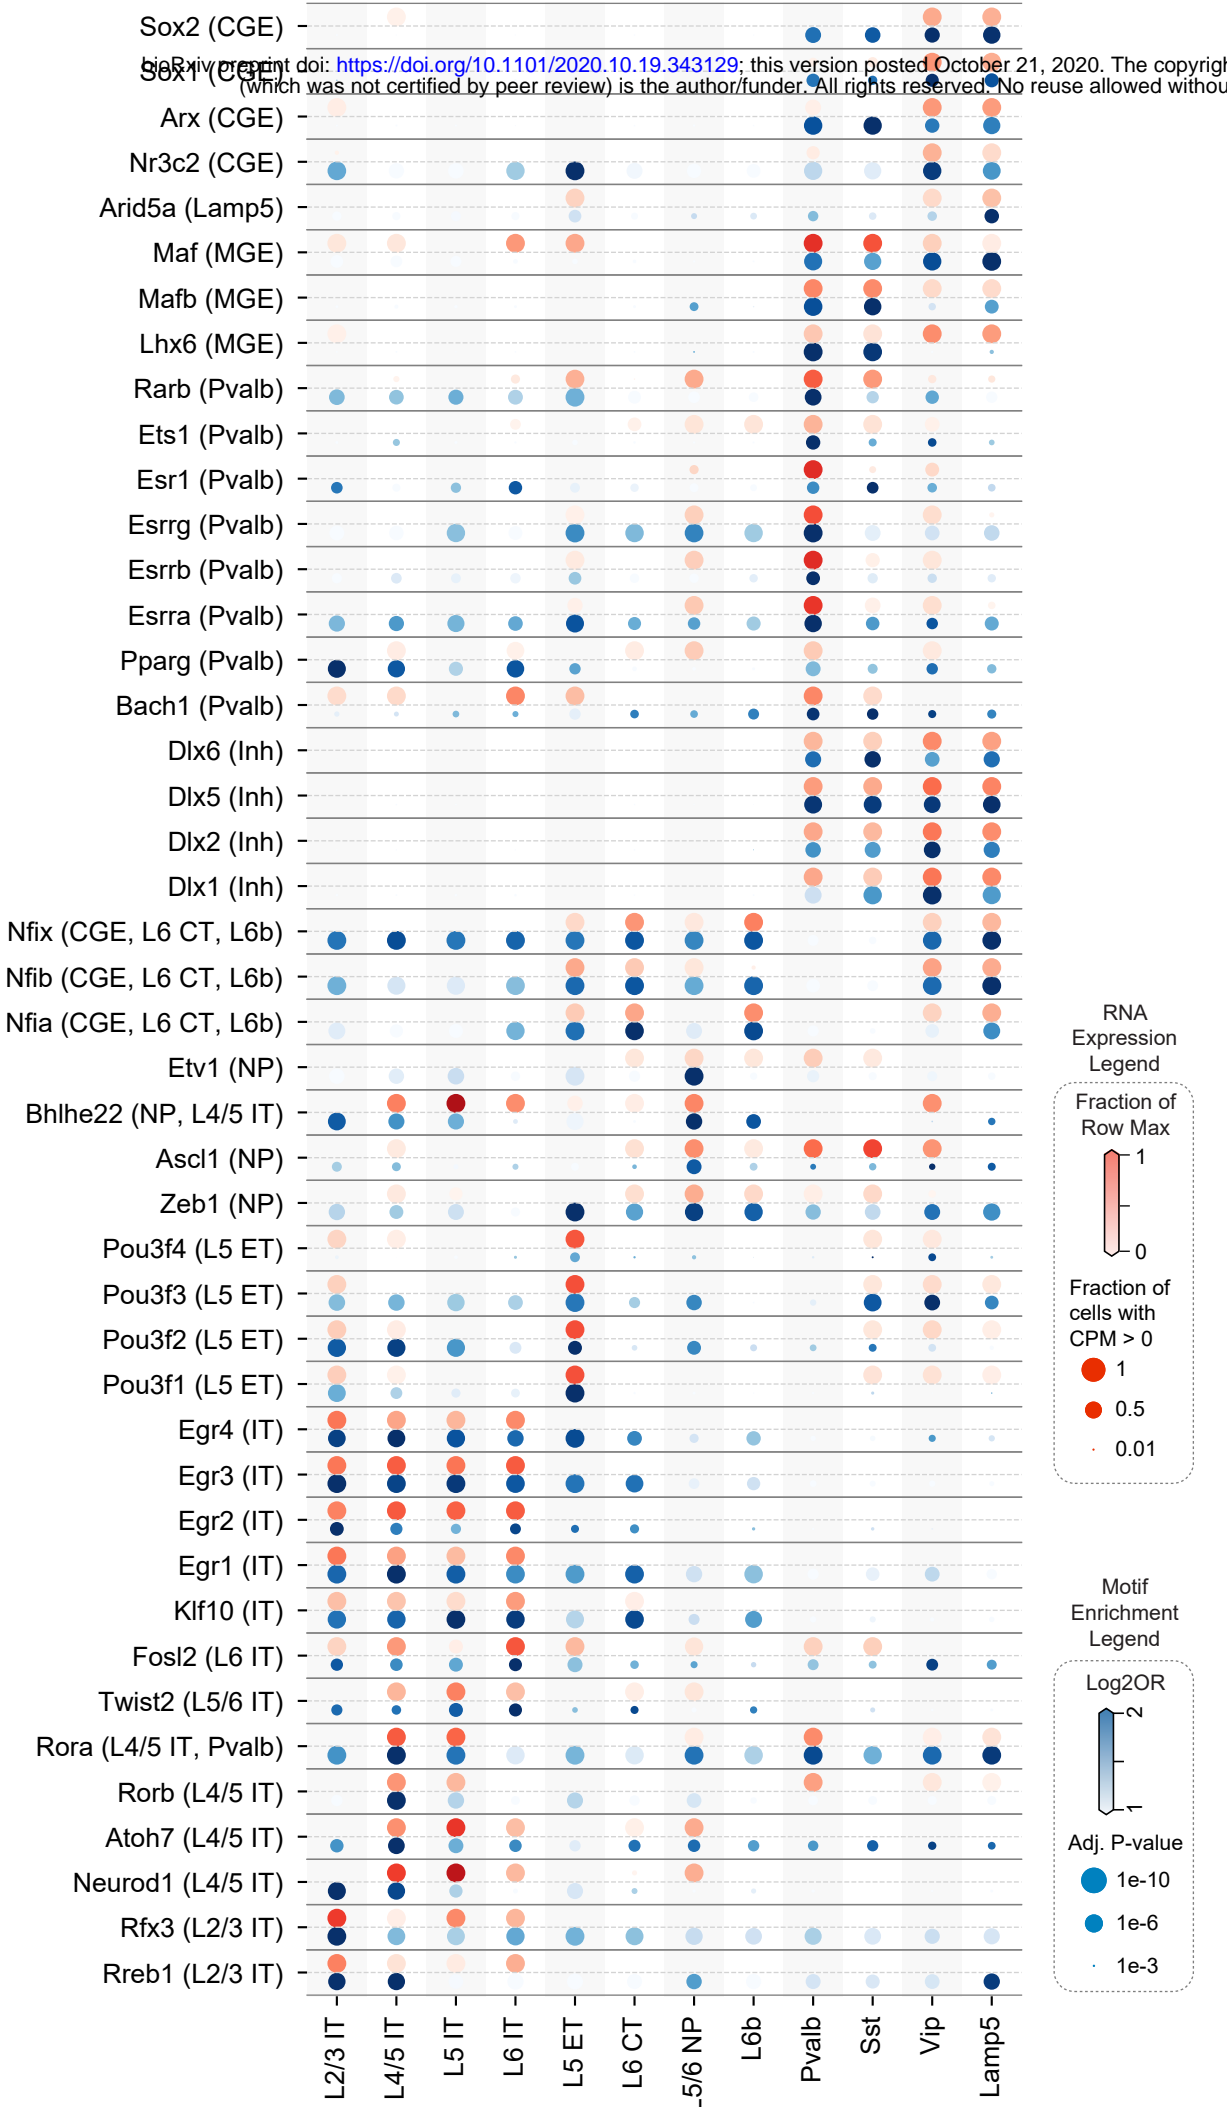

## A multimodal cell census and atlas of the mammalian primary motor cortex

### 1039 **DISCUSSION**

1040

#### 1041 *A cell census and atlas of motor cortex*

1042 Understanding the principles of brain circuit organization requires a detailed understanding of its  
1043 basic components, but the cellular diversity and complexity of the brain, including the neocortex,  
1044 have defied a comprehensive and quantitative description. Single-cell transcriptomics and  
1045 epigenomics, as well as spatially resolved single-cell transcriptomics, are accelerating efforts to  
1046 classify all molecular cell types in many organ systems<sup>40,99</sup>, including the brain<sup>5,6,100</sup>. The  
1047 current effort combines these technologies to derive a robust and comprehensive molecular cell  
1048 type classification and census of the primary motor cortex of mouse, marmoset and human,  
1049 coupled with a spatial atlas of cell types and an anatomical input/output wiring diagram in  
1050 mouse. We demonstrate the robustness and validity of this classification through strong  
1051 correlations across cellular phenotypes, and strong conservation across species. Together these  
1052 data comprise a cell atlas of primary motor cortex that encompasses a comprehensive reference  
1053 catalog of cell types, their proportions, spatial distributions and anatomical and physiological  
1054 characteristics, and molecular genetic profiles, registered into a Common Coordinate Framework  
1055<sup>41</sup>. This cell atlas establishes a foundation for an integrative study of the architecture and function  
1056 of cortical circuits akin to reference genomes for studying gene function and genome regulatory  
1057 architecture. Furthermore, it provides a comprehensive map of the genes that contribute to  
1058 cellular phenotypes and their epigenetic regulation. These data resources and associated tools  
1059 enabling genetic access for manipulative experimentation are publicly available and provide a  
1060 roadmap for exploring cellular diversity and organization across brain regions, organ systems,  
1061 and species.

1062

1063 The molecular classification presented here is overall consistent with prior literature and  
1064 synthesizes a wide body of existing and new information into a coherent quantitative framework  
1065 that provides metrics for the robustness of, and the similarities and distinctions between, cell  
1066 types. For motor cortex, as for other cortical regions<sup>15,18</sup>, this cellular organization is  
1067 hierarchical, with different branches comprising major cell classes, subclasses, and types  
1068 representing the finest resolution clusters afforded by each method. This classification provides  
1069 strong evidence for the existence of hitherto poorly studied but molecularly distinct subclasses  
1070 such as the near-projecting (NP) pyramidal neurons, and many more novel cell types. At the  
1071 level of cell class and subclass (and some highly distinctive types like chandelier cells and long-  
1072 range projecting Sst Chodl interneurons), we find remarkable concordance across  
1073 transcriptomics, epigenomics, spatial patterning, physiology and connectivity, as well as strong  
1074 homology across species. The class and subclass branches clearly represent different  
1075 developmental programs, such as GABAergic neuron derivatives of different zones of the  
1076 ganglionic eminences<sup>101,102</sup> or the layer-selective glutamatergic neurons derived sequentially  
1077 from progenitors of the cortical plate, and the hierarchical organization generates new  
1078 hypotheses about developmental origins of highly distinctive cell types. This quantitative

## A multimodal cell census and atlas of the mammalian primary motor cortex

1079 hierarchy also challenges well-established nomenclature systems. For example, the term glia is  
1080 typically used to encapsulate astrocytes, oligodendrocytes and OPCs, and microglia. However,  
1081 microglia are not closely related to these neuroectoderm-derived populations based on  
1082 transcriptomics or developmental origins<sup>103</sup> and should be grouped with other more similar non-  
1083 neuronal cell types such as endothelial cells, VLMCs and pericytes. Substantial challenges  
1084 remain for redefining data-driven cell ontologies and nomenclature systems<sup>100,104</sup>.

1085  
1086 Comparisons of the MOp results described here to other regions also help to understand what  
1087 makes the motor cortex functionally distinct. Previous transcriptomic studies suggested that  
1088 GABAergic interneuron types are shared among cortical regions whereas glutamatergic  
1089 projection neuron types exhibit gradient-like distribution across the cortical sheet and are more  
1090 distinct between distant regions but more similar between neighboring regions<sup>15,44</sup>. Thus the  
1091 projection neurons in MOp are more similar to those of nearby regions, yet our anatomical  
1092 tracing study defines a MOp-specific input-output wiring diagram. This result suggests that  
1093 differential axonal projections of similar molecular types among different cortical areas may be  
1094 the major feature defining regional functional specificity. We also find substantial variation in  
1095 the proportion of specific cell types between cortical areas. For example, we identify two  
1096 glutamatergic neuron types that distinguish MOp from its neighboring primary somatosensory  
1097 (SSp) region, the L4 IT neurons that are present in MOp at lower abundance level than in SSp  
1098 and the *Slco2a1*-expressing, medulla-projecting L5 ET neurons that are more abundant in MOp  
1099 than in SSp<sup>54,68</sup>. These regional differences in cellular makeup may contribute to the functional  
1100 specialization of MOp as well.

### 1101 1102 ***Cell type discreteness, variation and phenotypic concordance***

1103 The concordance of transcriptomic and epigenomic results and their overall correlation with  
1104 other cellular phenotypes, including spatial distributions, morphological properties,  
1105 electrophysiological properties, and projection/connectivity, strongly argues for a unifying  
1106 molecular genetic framework for understanding cortical cell types, particularly at the level of  
1107 subclasses and distinctive cell types. At the same time, substantial multimodal variations at finer  
1108 granularity appear to preclude a fully discretized representation of cell types with consistency  
1109 across all cellular phenotypes. One source of variation is differences in granularity with different  
1110 molecular data modalities, with transcriptomics providing the highest granularity at present.  
1111 This may reflect true biology or differences in technological information content, for example  
1112 sparse genome coverage in epigenetic methods. A second source involves continuous rather than  
1113 discrete variation. For example, while some highly granular cell types are highly distinct from  
1114 others (e.g. L6 IT Car3, Sst Chodl and Pvalb chandelier cells), many other types exhibit  
1115 continuous variation in their properties both within types and among closely related types with  
1116 no clear boundaries between them. However, even at this fine-grained level of continuous  
1117 variation, spatial, morphological and physiological properties often co-vary with transcriptomic  
1118 profiles as shown by MERFISH and Patch-seq. Similar findings on continuous as well as unitary



## A multimodal cell census and atlas of the mammalian primary motor cortex

1119 variations have been reported for hippocampal interneurons<sup>16</sup>. These results suggest that  
1120 continuous phenotypic variation may represent a general organizing principle underlying the  
1121 diversification of brain cell types.

1122  
1123 As shown in our mouse Epi-Retro-Seq, MERFISH, and single-neuron full morphology and  
1124 projection studies there is a strong correlation between molecular phenotype and axonal target  
1125 specificity at the subclass level (e.g., IT, L5 ET, L6 CT). This was also the case for medulla-  
1126 projecting L5 ET type. However, a strict correlation between molecular cell types and specific  
1127 axonal projection targets was not generally observed. It is possible that axon pathfinding during  
1128 development involves stochastic decisions and subsequent activity-dependent pruning that  
1129 mature cell transcriptomes do not represent. Furthermore, individual projection neurons typically  
1130 have collaterals to many different target regions which complicates understanding these  
1131 relationships. Comprehensive datasets on the complete axonal projections of individual neurons  
1132 whose molecular identity is clearly established will be needed to address this issue.

1133

### 1134 *Cell type conservation and divergence*

1135 Evolutionary conservation is strong evidence of functional significance. The demonstrated  
1136 conservation of cell types from mouse, marmoset, macaque and human strongly suggests that  
1137 these conserved types play important roles in cortical circuitry and contribute to a common  
1138 blueprint essential for cortical function in mammals and even more distantly related species. We  
1139 also find that similarity of cell types varies as a function of evolutionary distance, with  
1140 substantial species differences that either represent adaptive specializations or genetic drift. For  
1141 the most part species specializations tend to appear at the finer branches or leaves of the  
1142 hierarchical taxonomy. This result is consistent with a recent hypothesis in which cell types are  
1143 defined by common evolutionary descent and evolve independently, such that new cell types are  
1144 generally derived from existing genetic programs and appear as specializations at the finer levels  
1145 of the taxonomic tree<sup>105</sup>.

1146

1147 A surprising finding across all homologous cell types was the relatively high degree of  
1148 divergence for genes with highly cell type-specific expression in a given species. This  
1149 observation provides a clear path to identify the core conserved genes underlying the canonical  
1150 identity and features of those cell types. Furthermore, it highlights the need to understand species  
1151 adaptations superimposed on the conserved program, as many specific cellular phenotypes may  
1152 vary across species including gene expression, epigenetic regulation, morphology and  
1153 connectivity, and physiological functional properties. As we illustrate in the Betz cells, there is  
1154 clear homology across species in the layer 5 ET subclass, but variation in many measurable  
1155 properties across species.

1156

### 1157 *A framework for linking model organisms to human biology and disease*

## A multimodal cell census and atlas of the mammalian primary motor cortex

1158 The results presented have major utility and implications for the consideration of model  
1159 organisms to understand human brain function and disease. Despite major investments, animal  
1160 models of neuropsychiatric disorders have often been characterized by “loss of translation,”  
1161 fueling heated debates about the utility of model organisms in the search for therapeutic targets  
1162 for treating human diseases. The molecular genetic framework of cell type organization  
1163 established by the current study will provide a robust cellular metric system for cross-species  
1164 translation of knowledge and insight that bridges levels of organization based on their inherent  
1165 biological and evolutionary relationships. For example, the characterization of cell types and  
1166 their properties shown in **Figure 10** can be used to infer the main characteristics of homologous  
1167 cell types in humans and other mammalian species, despite the often extreme difficulty in  
1168 measuring their specific properties in those species. On the other hand, they also reveal the  
1169 potential limitations of model organisms and the necessity to study human and closely related  
1170 primate species to understand the specific features of cell types as they contribute to human brain  
1171 function and susceptibility to human-specific diseases. Having cell census information aligned  
1172 across species as illustrated here should be highly valuable for making rational choices about the  
1173 best models for each disease and therapeutic target. This reductionist dissection of the cellular  
1174 components provides a foundation for understanding the general principles of neural circuit  
1175 organization and computation that underlie mental activities and brain disorders.

1176

### 1177 *Future directions*

1178 The success of the current strategy to systematically and comprehensively dissect cell types and  
1179 generate a cell census and atlas opens up numerous avenues for future work. This census and  
1180 atlas form the foundation for the larger community to study specific features of cell types and  
1181 aggregate information about cell types across species much as genomic databases aggregate  
1182 information about genes. Classification of cell types and description of their molecular, spatial,  
1183 and connectional properties in the adult sets the stage for developmental studies to understand  
1184 the molecular genetic programs underlying cell type specification, maturation and circuit  
1185 connectivity. The molecular classification and the utility of combined single cell transcriptomics  
1186 and epigenomics to identify functional enhancers promises to deliver tools for genetic access to  
1187 the great majority of brain cell types via transgenic and viral strategies. A combination of some  
1188 of the approaches, such as imaging-based single-cell transcriptomics, with behavior stimulation  
1189 and functional imaging can further elucidate the functional roles of distinct cell types in circuit  
1190 computation. This systematic, multi-modal strategy described here is extensible to the whole  
1191 brain, and major efforts are underway in the BICCN to generate a brain-wide cell census and  
1192 atlas in the mouse with increasing coverage of human and non-human primates.

1193

1194

## 1195 **METHODS**

1196

1197 *Integrating 10x v3 snRNA-seq datasets across species*

## A multimodal cell census and atlas of the mammalian primary motor cortex

1198 To identify homologous cell types across species, human, marmoset, and mouse 10x v3 snRNA-  
1199 seq datasets were integrated using Seurat's SCTransform workflow. Each major cell class  
1200 (glutamatergic, GABAergic, and non-neuronal cells) was integrated separately across species.  
1201 Expression matrices were reduced to 14,870 one-to-one orthologs across the three species (NCBI  
1202 Homologene, 11/22/2019). Nuclei were downsampled to have approximately equivalent  
1203 numbers at the subclass level across species. Marker genes were identified for each species'  
1204 cluster and used as input to guide alignment and anchor-finding during integration steps. For full  
1205 methods see <sup>48</sup>.

1206

### 1207 *Estimation of cell type homology*

1208 To establish a robust cross-species cell type taxonomy, we applied a tree-based clustering  
1209 method on integrated class-level datasets ([https://github.com/AllenInstitute/BICCN\\_M1\\_Evo](https://github.com/AllenInstitute/BICCN_M1_Evo)).  
1210 The integrated space (from the above mentioned Seurat integration) was over-clustering into  
1211 small sets of highly similar nuclei for each class (~500 clusters per class). Clusters were  
1212 aggregated into metacells, then hierarchical clustering was performed based on the metacell gene  
1213 expression matrix using Ward's method. Hierarchical trees were then assessed for cluster size,  
1214 species mixing, and branch stability by subsampling the dataset 100 times with 95% of nuclei.  
1215 Finally, we recursively searched every node of the tree, and if certain heuristic criteria were not  
1216 sufficed for a node below the upper node, all nodes below the upper node were pruned and nuclei  
1217 belonging to this subtree were merged into one homologous group. We identified 24  
1218 GABAergic, 13 glutamatergic, and 8 non-neuronal cross-species consensus clusters that were  
1219 highly mixed across species and robust. For full methods see <sup>48</sup>.

1220

### 1221 *Cross-species differential gene expression and correlations*

1222 Expression matrices for each species, for each major cell class (GABAergic, glutamatergic, and  
1223 non-neuronal cells) were normalized using Seurat's SCTransform function with default  
1224 parameters to generate a 'corrected UMI' matrix and remove technical variation within each  
1225 species. SCTransform normalized counts matrices were then counts per 100,000 UMI (CP100K)  
1226 normalized to account for variable sequencing depths between species. CP100K normalization  
1227 was performed by multiplying each value in the 'corrected UMI' (SCTransform normalized)  
1228 matrix by 100,000 and dividing by the column sums (total UMIs from each nuclei).  
1229 SCTransform-CP100K normalized matrices were then used to find DE genes and correlations  
1230 between species for each cross-species cluster.

1231

1232 DE gene analysis was performed with Seurat's FindAllMarkers function, using the Wilcoxon  
1233 rank sum test, between each pair of species for a given cross-species cluster (e.g. human  
1234 Lamp5\_1 vs. marmoset Lamp5\_1, human Lamp5\_1 vs. mouse Lamp5\_1, and marmoset  
1235 Lamp5\_1 vs. mouse Lamp5\_1). Marker genes (FDR < 0.01, log fold-change > 2, expressed in at  
1236 least 10% of nuclei) from each pairwise species comparison were identified for each cross-  
1237 species cluster. We report the sum of marker genes between each species comparison as a

## A multimodal cell census and atlas of the mammalian primary motor cortex

1238 heatmap in Figure 2e and show that human and marmoset have fewer DE genes between each  
1239 other than with mouse across all cross-species clusters.

1240  
1241 To visualize the correspondence of a given cross-species cluster between each pair of species, we  
1242 first found the average SCTransform-CP100K expression for each cross-species cluster for each  
1243 species. Average expression was then log-transformed and the spearman correlations between  
1244 each species pair were identified and reported in the Figure 2d heatmap, which shows human and  
1245 marmoset have higher correlations than either primate with mouse for all clusters except Endo,  
1246 VLMC, and Microglia/PVM clusters (likely due to differences in sampling).

1247  
1248 ***Integrating mouse transcriptomic, spatially resolved transcriptomic, and epigenomic datasets***

1249 To integrate IT cell types from different mouse datasets, we first take all cells that are labeled as  
1250 IT, except for L6\_IT\_Car3, from the 11 datasets as listed in Figure 8a. These cell labels are  
1251 either from dataset-specific analyses<sup>54,64,79</sup>, or from the integrated clustering of multiple datasets  
1252<sup>45</sup>. The integrated clustering and embedding of the 11 datasets are then generated by projecting  
1253 all datasets into the 10x v2 scRNA-seq dataset using SingleCellFusion<sup>45,59</sup>. Genome browser  
1254 views of IT and ET cell types (Figure 8b and Figure 9d) are taken from the corresponding cell  
1255 types of the brainome portal ([brainome.ucsd.edu/BICCN\\_MOp](http://brainome.ucsd.edu/BICCN_MOp))<sup>45</sup>.

1256  
1257 ***Integration of L5 ET cells from Epi-Retro-Seq and 10x snRNA-Seq***

1258 For snRNA-Seq, the 4,515 cells from 10x v3 B dataset labeled as L5 ET by SCF were selected  
1259<sup>45</sup>. The read counts were normalized by the total read counts per cell and log transformed. Top  
1260 5,000 highly variable genes were identified with Scanpy<sup>106</sup> and z-score scaled across all the  
1261 cells. For Epi-Retro-Seq, the posterior methylation levels of 12,261 genes in the 848 L5 ET cells  
1262 were computed<sup>79</sup>. Top 5,000 highly variable genes were identified with AllCools<sup>59</sup> and z-score  
1263 scaled across all the cells. The 1,512 genes as the intersection between the two highly variable  
1264 gene lists were used in Scanorama<sup>107</sup> to integrate the z-scored expression matrix and minus z-  
1265 scored methylation matrix with sigma equal to 100.

1266  
1267 ***Identification of candidate cis-regulatory elements***

1268 For peak calling in the snATAC-seq data, we extracted all the fragments for each cluster, and  
1269 then performed peak calling on each aggregate profile using MACS2<sup>108</sup> with parameter: "--  
1270 nomodel --shift -100 --ext 200 --qval 1e-2 -B --SPMR". First, we extended peak summits by  
1271 250 bp on either side to a final width of 501 bp. Then, to account for differences in performance  
1272 of MACS2 based on read depth and/or number of nuclei in individual clusters, we converted  
1273 MACS2 peak scores (-log<sub>10</sub>(q-value)) to "score per million"<sup>109</sup>. Next, a union peak set was  
1274 obtained by applying an iterative overlap peak merging procedure, which avoids daisy-chaining  
1275 and still allows for use of fixed-width peaks. Finally, we filtered peaks by choosing a "score per  
1276 million" cut-off of 5 as candidate cis-regulatory elements (cCREs) for downstream analysis.

1277

## A multimodal cell census and atlas of the mammalian primary motor cortex

### 1278 ***Predicting enhancer-promoter interactions***

1279 First, co-accessible cCREs are identified for all open regions in all neurons types (cell clusters  
1280 with less than 100 nuclei from snATAC-seq are excluded), using Cicero<sup>110</sup> with following  
1281 parameters: aggregation  $k = 50$ , window size = 500 kb, distance constraint = 250 kb. In order to  
1282 find an optimal co-accessibility threshold, we generated a random shuffled cCRE-by-cell matrix  
1283 as background and calculated co-accessible scores from this shuffled matrix. We fitted the  
1284 distribution of co-accessibility scores from random shuffled background into a normal  
1285 distribution model by using R package `fitdistrplus`<sup>111</sup>. Next, we tested every co-accessible cCRE  
1286 pair and set the cut-off at co-accessibility score with an empirically defined significance  
1287 threshold of  $FDR < 0.01$ . The cCREs outside of  $\pm 1$  kb of transcriptional start sites (TSS) in  
1288 GENCODE mm10 (v16) were considered distal. Next, we assigned co-accessibility pairs to three  
1289 groups: proximal-to-proximal, distal-to-distal, and distal-to-proximal. In this study, we focus  
1290 only on distal-to-proximal pairs. We calculated the Pearson's correlation coefficient (PCC)  
1291 between gene expression (scRNA SMART-seq) and cCRE accessibility across the joint clusters  
1292 to examine the relationships between the distal cCREs and target genes as predicted by the co-  
1293 accessibility pairs. To do so, we first aggregated all nuclei/cells from scRNA-seq and snATAC-  
1294 seq for every joint cluster to calculate accessibility scores ( $\log_2$  CPM) and relative expression  
1295 levels ( $\log_2$  TPM). Then, PCC was calculated for every gene-cCRE pair within a 1 Mbp window  
1296 centered on the TSS for every gene. We also generated a set of background pairs by randomly  
1297 selecting regions from different chromosomes and shuffling of cluster labels. Finally, we fit a  
1298 normal distribution model and defined a cut-off at PCC score with an empirically defined  
1299 significance threshold of  $FDR < 0.01$ , in order to select significant positively correlated cCRE-  
1300 gene pairs.

1301

### 1302 ***Identification of cis-regulatory modules***

1303 We used Nonnegative Matrix Factorization (NMF) to group cCREs into cis-regulatory modules  
1304 based on their relative accessibility across cell clusters. We adapted NMF (Python package:  
1305 `sklearn`) to decompose the cell-by-cCRE matrix  $V$  ( $N \times M$ ,  $N$  rows: cCRE,  $M$  columns: cell  
1306 clusters) into a coefficient matrix  $H$  ( $R \times M$ ,  $R$  rows: number of modules) and a basis matrix  $W$   
1307 ( $N \times R$ ), with a given rank  $R$ :

$$1308 \quad V \approx WH,$$

1309 The basis matrix defines module related accessible cCREs, and the coefficient matrix defines the  
1310 cell cluster components and their weights in each module. The key issue to decompose the  
1311 occupancy profile matrix was to find a reasonable value for the rank  $R$  (i.e., the number of  
1312 modules). Several criteria have been proposed to decide whether a given rank  $R$  decomposes the  
1313 occupancy profile matrix into meaningful clusters. Here we applied a measurement called  
1314 “Sparseness”<sup>112</sup> to evaluate the clustering result. Median values were calculated from 100 times  
1315 for NMF runs at each given rank with a random seed, which will ensure the measurements are  
1316 stable. Next, we used the coefficient matrix to associate modules with distinct cell clusters. In the  
1317 coefficient matrix, each row represents a module and each column represents a cell cluster. The

## A multimodal cell census and atlas of the mammalian primary motor cortex

1318 values in the matrix indicate the weights of clusters in their corresponding module. The  
1319 coefficient matrix was then scaled by column (cluster) from 0 to 1. Subsequently, we used a  
1320 coefficient  $> 0.1$  (~95th percentile of the whole matrix) as a threshold to associate a cluster with  
1321 a module. Similarly, we associated each module with accessible elements using the basis matrix.  
1322 For each element and each module, we derived a basis coefficient score, which represents the  
1323 accessible signal contributed by all clusters in the defined module.

1324

### ***Identification of subclass-selective TFs by both RNA expression and motif enrichment***

1326 All analyses for this section were at the subclass level. For RNA expression, we used the sc  
1327 SMART-seq dataset and compared each subclass with the rest of the population through a one-  
1328 tailed Wilcoxon test and FDR correction to select significantly differentially-expressed  
1329 transcription factors (adjusted P-value  $< 0.05$ , cluster average fold change  $> 2$ ). To perform the  
1330 motif enrichment analysis, we used known motifs from the JASPAR 2020 database<sup>113</sup> and the  
1331 subclass specific hypo-CG-DMR identified in Yao et al<sup>45</sup>. The AME software from the MEME  
1332 suite (v5.1.1)<sup>114</sup> was used to identify significant motif enrichment (adjusted P-value  $< 1e-3$ , odds  
1333 ratio  $> 1.3$ ) using default parameters and the same background region set as described in Yao et  
1334 al<sup>45</sup>. All genes in **Extended Data Figure 3** were both significantly expressed and had their motif  
1335 enriched in at least one of the subclasses.

1336

### ***Generation and use of transgenic mouse lines***

1338 Npnt-P2A-FlpO and Slco2a1-P2A-Cre mouse driver lines were generated by CRISPR/Cas9-  
1339 mediated homologous recombination (Stafford et al., BICCN companion manuscript in  
1340 preparation). Details are provided in the Supplementary Methods.

1341

1342 All experimental procedures were approved by the Institutional Animal Care and Use  
1343 Committees (IACUC) of Cold Spring Harbor Laboratory, University of California, Berkeley and  
1344 Allen Institute, in accordance with NIH guidelines. Mouse knock-in driver lines are being  
1345 deposited at the Jackson Laboratory for wide distribution.

1346

1347

### ***Data and code availability***

1348

### **Figure 1. Summary of experimental and computational approaches taken as well as community resources generated by the BICCN**

1349

1350 All primary data available through the BICCN portal, data archives, and supporting tools.

1351

1352

1353

1354

1355

1356

1357

- Brain Cell Data Center (BCDC), [www.biccn.org](http://www.biccn.org)
- Neuroscience Multi-Omics Archive (NeMO), [www.nemoarchive.org](http://www.nemoarchive.org)
- Brain Image Library (BIL), [www.brainimagelibrary.org](http://www.brainimagelibrary.org)
- Neurophysiology (DANDI), [dandiarchive.org](http://dandiarchive.org)

## A multimodal cell census and atlas of the mammalian primary motor cortex

- 1358       • Allen Transcriptomics Explorer, <https://portal.brain-map.org/atlasses-and-data/rnaseq>  
 1359       • NeMO Analytics, [www.nemoanalytics.org](http://www.nemoanalytics.org)  
 1360       • Morphological reconstructions, NeuroMorpho, [www.neuromorpho.org](http://www.neuromorpho.org)

1361

### 1362 **Figure 2. MOp consensus cell type taxonomy**

1363

#### 1364 **Primary Data**

|            |                                                           |                                                                                                                                                                                               |
|------------|-----------------------------------------------------------|-----------------------------------------------------------------------------------------------------------------------------------------------------------------------------------------------|
| Panel a    |                                                           | <a href="http://data.nemoarchive.org/publication_release/MOp_MiniAtlas_2020/">http://data.nemoarchive.org/publication_release/MOp_MiniAtlas_2020/</a>                                         |
| Panels b-g | 10x V3 macaque                                            | <a href="http://data.nemoarchive.org/biccn/lab/lein/lein/transcriptomic/sncell/raw/">http://data.nemoarchive.org/biccn/lab/lein/lein/transcriptomic/sncell/raw/</a>                           |
|            | 10x V3 human (10X159-1 through 10x160-8)                  | <a href="http://data.nemoarchive.org/biccn/lab/linnarsson/transcriptome/sncell/10X/raw/10X159-1/">http://data.nemoarchive.org/biccn/lab/linnarsson/transcriptome/sncell/10X/raw/10X159-1/</a> |
|            | 10x V3 marmoset (bi005_m1, bi006_m1)                      | <a href="http://data.nemoarchive.org/biccn/lab/feng/transcriptome/sncell/raw/">http://data.nemoarchive.org/biccn/lab/feng/transcriptome/sncell/raw/</a>                                       |
|            | 10x V3 mouse broad data (files with prefix pBICCNsMMrMOp) | <a href="http://data.nemoarchive.org/biccn/grant/huang/macosko/transcriptome/sncell/raw">http://data.nemoarchive.org/biccn/grant/huang/macosko/transcriptome/sncell/raw</a>                   |
| Panel h:   |                                                           |                                                                                                                                                                                               |

1365

#### 1366 **Intermediate analyses**

|              |                                                                                                                                                                                                                                                                                                                   |
|--------------|-------------------------------------------------------------------------------------------------------------------------------------------------------------------------------------------------------------------------------------------------------------------------------------------------------------------|
| Panel a:     | <a href="https://github.com/mukamel-lab/BICCN-Mouse-MOp/tree/master/flagship_fig2a">https://github.com/mukamel-lab/BICCN-Mouse-MOp/tree/master/flagship_fig2a</a>                                                                                                                                                 |
| Panel b:     | dendrogram from companion paper (Bakken et al. 2020)                                                                                                                                                                                                                                                              |
| Panel c:     | <a href="http://data.nemoarchive.org/brain/biccn/lab/lein/2020_M1_study_analysis/Transcriptomics/flagship/dendrogram_barplots">http://data.nemoarchive.org/brain/biccn/lab/lein/2020_M1_study_analysis/Transcriptomics/flagship/dendrogram_barplots</a>                                                           |
| Panels d, e: | <a href="http://data.nemoarchive.org/brain/biccn/lab/lein/2020_M1_study_analysis/Transcriptomics/flagship/dendrogram_heatmaps">http://data.nemoarchive.org/brain/biccn/lab/lein/2020_M1_study_analysis/Transcriptomics/flagship/dendrogram_heatmaps</a>                                                           |
| Panels f, g: | from companion paper (Bakken et al. 2020)                                                                                                                                                                                                                                                                         |
| Panel h:     | <a href="http://data.nemoarchive.org/biccn/lab/lein/2020_M1_study_analysis/Transcriptomics/flagship/cross_species_heatmap/GABAergic_avg_CP100K_expr.csv.gz">http://data.nemoarchive.org/biccn/lab/lein/2020_M1_study_analysis/Transcriptomics/flagship/cross_species_heatmap/GABAergic_avg_CP100K_expr.csv.gz</a> |
| Panel i:     | Custom UCSC browser of all M1 tracks<br><a href="https://genome.ucsc.edu/s/sarojas/hg38-mop-dense">https://genome.ucsc.edu/s/sarojas/hg38-mop-dense</a>                                                                                                                                                           |

1367

#### 1368 **Extended Data**

|                         |                                                                                                                                                                                                                                                             |
|-------------------------|-------------------------------------------------------------------------------------------------------------------------------------------------------------------------------------------------------------------------------------------------------------|
| Panel j:                | Browser <a href="https://brainome.ucsd.edu/annoj/BICCN_MOp/">https://brainome.ucsd.edu/annoj/BICCN_MOp/</a>                                                                                                                                                 |
| Extended Data Figure 1: | <a href="http://data.nemoarchive.org/brain/biccn/lab/lein/2020_M1_study_analysis/Transcriptomics/flagship/cluster_overlap_plots">http://data.nemoarchive.org/brain/biccn/lab/lein/2020_M1_study_analysis/Transcriptomics/flagship/cluster_overlap_plots</a> |

1369

A multimodal cell census and atlas of the mammalian primary motor cortex

1370 **Figure 3: In situ cell-type identification, spatial mapping and projection mapping of**  
 1371 **individual cells in the MOp by MERFISH**

1372

1373 **Primary Data**

1374 <ftp://download.brainimagelibrary.org:8811/02/26/02265ddb0dae51de/>

1375

1376 **Figure 4. Correspondence between transcriptomic and morpho-electrical properties of**  
 1377 **mouse MOp neurons by Patch-seq, and cross-species comparison of L5 ET neurons.**

1378

1379 **Primary Data**

|               |                                                           |                                                                                                                                                                                               |
|---------------|-----------------------------------------------------------|-----------------------------------------------------------------------------------------------------------------------------------------------------------------------------------------------|
| Panel b,c,j,k | Electrophysiology data                                    | <a href="https://dandiarchive.org/dandiset/000008">https://dandiarchive.org/dandiset/000008</a>                                                                                               |
| Panel h:      | 10x V3 macaque                                            | <a href="http://data.nemoarchive.org/biccn/lab/lein/lein/transcriptomic/sncell/raw/">http://data.nemoarchive.org/biccn/lab/lein/lein/transcriptomic/sncell/raw/</a>                           |
|               | 10x V3 human (10X159-1 through 10x160-8)                  | <a href="http://data.nemoarchive.org/biccn/lab/linnarsson/transcriptome/sncell/10X/raw/10X159-1/">http://data.nemoarchive.org/biccn/lab/linnarsson/transcriptome/sncell/10X/raw/10X159-1/</a> |
|               | 10x V3 marmoset (bi005_m1, bi006_m1)                      | <a href="http://data.nemoarchive.org/biccn/lab/feng/transcriptome/sncell/raw/">http://data.nemoarchive.org/biccn/lab/feng/transcriptome/sncell/raw/</a>                                       |
|               | 10x V3 mouse broad data (files with prefix pBICCNsMMrMOp) | <a href="http://data.nemoarchive.org/biccn/grant/huang/macosko/transcriptome/sncell/raw">http://data.nemoarchive.org/biccn/grant/huang/macosko/transcriptome/sncell/raw</a>                   |

1380

1381 **Intermediate analyses**

|          |                           |                                                                                                                                                                                                                                                                                                                                   |
|----------|---------------------------|-----------------------------------------------------------------------------------------------------------------------------------------------------------------------------------------------------------------------------------------------------------------------------------------------------------------------------------|
| Panel h: | 10x 4 species integration | <a href="http://data.nemoarchive.org/biccn/lab/lein/2020_M1_study_analysis/Transcriptomics/cross_species_integration/sample.combined_exc_4_species_integration.RDS">http://data.nemoarchive.org/biccn/lab/lein/2020_M1_study_analysis/Transcriptomics/cross_species_integration/sample.combined_exc_4_species_integration.RDS</a> |
| Panel h: | Code:                     | <a href="http://data.nemoarchive.org/brain/biccn/lab/lein/2020_M1_study_analysis/Transcriptomics/flagship/projecting_patch_seq_onto_umap">http://data.nemoarchive.org/brain/biccn/lab/lein/2020_M1_study_analysis/Transcriptomics/flagship/projecting_patch_seq_onto_umap</a>                                                     |

1382

1383 **Figure 5: Epi-Retro-Seq links molecular cell type with distal projection targets**

1384

1385 **Intermediate analyses**

1386 <https://github.com/zhoujt1994/BICCN2020Flagship.git>

1387

1388 **Figure 6: Global wiring diagram and anatomical characterization of MOp-ul neuron types**

1389

1390 **Primary Data**

| Label in Fig | Link to registered swc (single cells) or 25 um grid file (tracer) | high resolution image data |
|--------------|-------------------------------------------------------------------|----------------------------|
|--------------|-------------------------------------------------------------------|----------------------------|



## A multimodal cell census and atlas of the mammalian primary motor cortex

|                      |                                                                                                                                                                                                                                                                                               |                                                                                                                                                                                                         |
|----------------------|-----------------------------------------------------------------------------------------------------------------------------------------------------------------------------------------------------------------------------------------------------------------------------------------------|---------------------------------------------------------------------------------------------------------------------------------------------------------------------------------------------------------|
| Rabies               | <a href="http://download.alleninstitute.org/publications/cellular_anatomy_of_the_mouse_primary_motor_cortex/Viral_Tracer_Data_in_MOp_25_um_nrrd/">http://download.alleninstitute.org/publications/cellular_anatomy_of_the_mouse_primary_motor_cortex/Viral_Tracer_Data_in_MOp_25_um_nrrd/</a> | <a href="ftp://download.brainimagelibrary.org:8811/74/02/7402741313727c9b/tissuecyte_data/0500370607/">ftp://download.brainimagelibrary.org:8811/74/02/7402741313727c9b/tissuecyte_data/0500370607/</a> |
| AAV                  | <a href="http://download.alleninstitute.org/publications/cellular_anatomy_of_the_mouse_primary_motor_cortex/Viral_Tracer_Data_in_MOp_25_um_nrrd/">http://download.alleninstitute.org/publications/cellular_anatomy_of_the_mouse_primary_motor_cortex/Viral_Tracer_Data_in_MOp_25_um_nrrd/</a> | <a href="http://connectivity.brain-map.org/projection/experiment/127084296">http://connectivity.brain-map.org/projection/experiment/127084296</a>                                                       |
| Cux2<br>L2/3/4<br>IT | <a href="http://download.alleninstitute.org/publications/cellular_anatomy_of_the_mouse_primary_motor_cortex/Viral_Tracer_Data_in_MOp_25_um_nrrd/">http://download.alleninstitute.org/publications/cellular_anatomy_of_the_mouse_primary_motor_cortex/Viral_Tracer_Data_in_MOp_25_um_nrrd/</a> | n/a                                                                                                                                                                                                     |
| Nr5a1<br>L4 IT       | <a href="http://download.alleninstitute.org/publications/cellular_anatomy_of_the_mouse_primary_motor_cortex/Viral_Tracer_Data_in_MOp_25_um_nrrd/">http://download.alleninstitute.org/publications/cellular_anatomy_of_the_mouse_primary_motor_cortex/Viral_Tracer_Data_in_MOp_25_um_nrrd/</a> | n/a                                                                                                                                                                                                     |
| Tlx3<br>L5 IT        | <a href="http://download.alleninstitute.org/publications/cellular_anatomy_of_the_mouse_primary_motor_cortex/Viral_Tracer_Data_in_MOp_25_um_nrrd/">http://download.alleninstitute.org/publications/cellular_anatomy_of_the_mouse_primary_motor_cortex/Viral_Tracer_Data_in_MOp_25_um_nrrd/</a> | n/a                                                                                                                                                                                                     |
| Rbp4<br>L5<br>IT+ET  | <a href="http://download.alleninstitute.org/publications/cellular_anatomy_of_the_mouse_primary_motor_cortex/Viral_Tracer_Data_in_MOp_25_um_nrrd/">http://download.alleninstitute.org/publications/cellular_anatomy_of_the_mouse_primary_motor_cortex/Viral_Tracer_Data_in_MOp_25_um_nrrd/</a> | n/a                                                                                                                                                                                                     |
| Sim1<br>L5 ET        | <a href="http://download.alleninstitute.org/publications/cellular_anatomy_of_the_mouse_primary_motor_cortex/Viral_Tracer_Data_in_MOp_25_um_nrrd/">http://download.alleninstitute.org/publications/cellular_anatomy_of_the_mouse_primary_motor_cortex/Viral_Tracer_Data_in_MOp_25_um_nrrd/</a> | <a href="http://connectivity.brain-map.org/projection/experiment/297711339">http://connectivity.brain-map.org/projection/experiment/297711339</a>                                                       |
| Ntsr1<br>L6 CT       | <a href="http://download.alleninstitute.org/publications/cellular_anatomy_of_the_mouse_primary_motor_cortex/Viral_Tracer_Data_in_MOp_25_um_nrrd/">http://download.alleninstitute.org/publications/cellular_anatomy_of_the_mouse_primary_motor_cortex/Viral_Tracer_Data_in_MOp_25_um_nrrd/</a> | <a href="http://connectivity.brain-map.org/projection/experiment/159651060">http://connectivity.brain-map.org/projection/experiment/159651060</a>                                                       |
| IT<br>projections    | <a href="http://download.alleninstitute.org/publications/cellular_anatomy_of_the_mouse_primary_motor_cortex/Single_Cell_Reconstructions_in_MOp/">http://download.alleninstitute.org/publications/cellular_anatomy_of_the_mouse_primary_motor_cortex/Single_Cell_Reconstructions_in_MOp/</a>   | <a href="/bil/proj/u19zeng/fMOST_raw_data/mouseID_374712-18453_CH2">/bil/proj/u19zeng/fMOST_raw_data/mouseID_374712-18453_CH2</a><br>(pending upload)                                                   |
| IT<br>projections    | <a href="http://download.alleninstitute.org/publications/cellular_anatomy_of_the_mouse_primary_motor_cortex/Single_Cell_Reconstructions_in_MOp/">http://download.alleninstitute.org/publications/cellular_anatomy_of_the_mouse_primary_motor_cortex/Single_Cell_Reconstructions_in_MOp/</a>   | n/a                                                                                                                                                                                                     |
| IT<br>projections    | <a href="http://ml-neuronbrowser.janelia.org/">http://ml-neuronbrowser.janelia.org/</a>                                                                                                                                                                                                       | n/a                                                                                                                                                                                                     |
| ET<br>projections    | <a href="http://download.alleninstitute.org/publications/cellular_anatomy_of_the_mouse_primary_motor_cortex/Single_Cell_Reconstructions_in_MOp/">http://download.alleninstitute.org/publications/cellular_anatomy_of_the_mouse_primary_motor_cortex/Single_Cell_Reconstructions_in_MOp/</a>   | <a href="/bil/data/2b/da/2bdaf9e66a246844/mouseID_405429-182725">/bil/data/2b/da/2bdaf9e66a246844/mouseID_405429-182725</a> (pending upload)                                                            |
| ET<br>projections    | <a href="http://download.alleninstitute.org/publications/cellular_anatomy_of_the_mouse_primary_motor_cortex/Single_Cell_Reconstructions_in_MOp/">http://download.alleninstitute.org/publications/cellular_anatomy_of_the_mouse_primary_motor_cortex/Single_Cell_Reconstructions_in_MOp/</a>   | <a href="/bil/data/2b/da/2bdaf9e66a246844/mouseID_405429-182725">/bil/data/2b/da/2bdaf9e66a246844/mouseID_405429-182725</a> (pending upload)                                                            |

## A multimodal cell census and atlas of the mammalian primary motor cortex

|                |                                                                                         |     |
|----------------|-----------------------------------------------------------------------------------------|-----|
| CT projections | <a href="http://ml-neuronbrowser.janelia.org/">http://ml-neuronbrowser.janelia.org/</a> | n/a |
| CT projections | <a href="http://ml-neuronbrowser.janelia.org/">http://ml-neuronbrowser.janelia.org/</a> | n/a |

1391

| Panels d-i | Label in Fig         | Full Descriptive ID | experiment id | Originating Lab                                                                                                           | Link to Brain Architecture viewer |
|------------|----------------------|---------------------|---------------|---------------------------------------------------------------------------------------------------------------------------|-----------------------------------|
| PlxnD1     | PlxnD1-CreER;LSL-Flp | 180722              | Huang         | <a href="http://brainarchitecture.org/viewer4/mouse/map/8401F">http://brainarchitecture.org/viewer4/mouse/map/8401F</a>   |                                   |
| PlxnD1     | PlxnD1-CreER;LSL-Flp | 180730              | Huang         | <a href="http://brainarchitecture.org/viewer4/mouse/map/28819F">http://brainarchitecture.org/viewer4/mouse/map/28819F</a> |                                   |
| Tle4       | Tle4-CreER;LSL-Flp   | 180605              | Huang         | <a href="http://brainarchitecture.org/viewer4/mouse/map/28814F">http://brainarchitecture.org/viewer4/mouse/map/28814F</a> |                                   |
| Tle4       | Tle4-CreER;LSL-Flp   | 180816              | Huang         | <a href="http://brainarchitecture.org/viewer4/mouse/map/8421F">http://brainarchitecture.org/viewer4/mouse/map/8421F</a>   |                                   |

1392

1393

### Intermediate analyses

|         |                                                                                                                               |                                                      |
|---------|-------------------------------------------------------------------------------------------------------------------------------|------------------------------------------------------|
| panel c | <a href="https://github.com/AllenInstitute/MOp_anatomy_rendering">https://github.com/AllenInstitute/MOp_anatomy_rendering</a> | code to reproduce rendering of registered data in 3D |
|---------|-------------------------------------------------------------------------------------------------------------------------------|------------------------------------------------------|

1394

1395

### **Figure 7: Genetic tools for targeting cortical glutamatergic projection neuron types**

1396

1397

### Primary Data

| Panels d-i | Label in Fig         | Full Descriptive ID | experiment id | Originating Lab                                                                                                           | Link to Brain Architecture viewer                                                                                                                                                                                                 | BIL link |
|------------|----------------------|---------------------|---------------|---------------------------------------------------------------------------------------------------------------------------|-----------------------------------------------------------------------------------------------------------------------------------------------------------------------------------------------------------------------------------|----------|
| PlxnD1     | PlxnD1-CreER;LSL-Flp | 180722              | Huang         | <a href="http://brainarchitecture.org/viewer4/mouse/map/8401F">http://brainarchitecture.org/viewer4/mouse/map/8401F</a>   | <a href="https://download.brainimagelibrary.org/84/aa/84aa97d12a6c17ba/180722_WG_PlxnD1IslFlpCFA1female_processed/">https://download.brainimagelibrary.org/84/aa/84aa97d12a6c17ba/180722_WG_PlxnD1IslFlpCFA1female_processed/</a> |          |
| PlxnD1     | PlxnD1-CreER;LSL-Flp | 180730              | Huang         | <a href="http://brainarchitecture.org/viewer4/mouse/map/28819F">http://brainarchitecture.org/viewer4/mouse/map/28819F</a> | <a href="https://download.brainimagelibrary.org/e9/2a/e92aa2dc0e14ad4d/180730_WG010_PlxnD1_CFA_female_processed/">https://download.brainimagelibrary.org/e9/2a/e92aa2dc0e14ad4d/180730_WG010_PlxnD1_CFA_female_processed/</a>     |          |
| Fezf2      | Fezf2-               | 180830              | Huang         | <a href="http://brainarchitecture.org/viewer4/mouse/map/8401F">http://brainarchitecture.org/viewer4/mouse/map/8401F</a>   | <a href="https://download.brainimagelibrary.org">https://download.brainimagelibrary.org</a>                                                                                                                                       |          |

## A multimodal cell census and atlas of the mammalian primary motor cortex

|       |                             |        |       |                                                       |                                                                                                                                                                                                                                                         |
|-------|-----------------------------|--------|-------|-------------------------------------------------------|---------------------------------------------------------------------------------------------------------------------------------------------------------------------------------------------------------------------------------------------------------|
|       | CreER;<br>LSL-Flp           |        |       | re.org/viewer4/mouse/map/28827F                       | <a href="https://download.brainimagelibrary.org/db/b8/dbb827c84942c557/180830_JH_WG_Fezf2LSLflp_CFA_female/">/db/b8/dbb827c84942c557/180830_JH_WG_Fezf2LSLflp_CFA_female/</a>                                                                           |
| Fezf2 | Fezf2-<br>CreER;<br>LSL-Flp | 190903 | Huang | http://brainarchitecture.org/viewer4/mouse/map/28917F | <a href="https://download.brainimagelibrary.org/2b/6e/2b6e48dc425d16db/190903_JH_WG0006_Fezf2LSLflp_MOp_CFA_female_processed/">https://download.brainimagelibrary.org/2b/6e/2b6e48dc425d16db/190903_JH_WG0006_Fezf2LSLflp_MOp_CFA_female_processed/</a> |
| Tle4  | Tle4-<br>CreER;<br>LSL-Flp  | 180605 | Huang | http://brainarchitecture.org/viewer4/mouse/map/28814F | <a href="https://download.brainimagelibrary.org/84/aa/84aa97d12a6c17ba/180605_WG_Tle4IslFlpRPCFA_female_processed/">https://download.brainimagelibrary.org/84/aa/84aa97d12a6c17ba/180605_WG_Tle4IslFlpRPCFA_female_processed/</a>                       |
| Tle4  | Tle4-<br>CreER;<br>LSL-Flp  | 180816 | Huang | http://brainarchitecture.org/viewer4/mouse/map/8421F  | <a href="https://download.brainimagelibrary.org/c8/1f/c81fe306a97b33e8/180816_JH_WG_Tle4LSLFlpNPCfa_female/">https://download.brainimagelibrary.org/c8/1f/c81fe306a97b33e8/180816_JH_WG_Tle4LSLFlpNPCfa_female/</a>                                     |

1398

1399 **Figure 8: Existence of L4 excitatory neurons in MOp.**

1400

1401 **Intermediate analyses**

|              |                                                                                                                                                                 |
|--------------|-----------------------------------------------------------------------------------------------------------------------------------------------------------------|
| Panels a,c,e | <a href="https://github.com/mukamel-lab/BICCN-Mouse-MOp/tree/master/flagship_fig8">https://github.com/mukamel-lab/BICCN-Mouse-MOp/tree/master/flagship_fig8</a> |
| Panel b      | <a href="https://brainome.ucsd.edu/anoj/BICCN_MOp/">https://brainome.ucsd.edu/anoj/BICCN_MOp/</a>                                                               |

1402

1403 **Figure 9: Two distinct L5 ET projection neuron types in MOp**

1404

1405 **Intermediate analyses**

|         |                                                                                                                       |
|---------|-----------------------------------------------------------------------------------------------------------------------|
| Panel d | <a href="https://brainome.ucsd.edu/anoj/BICCN_MOp/">https://brainome.ucsd.edu/anoj/BICCN_MOp/</a>                     |
| Panel e | <a href="https://github.com/zhoujt1994/BICCN2020Flagship.git">https://github.com/zhoujt1994/BICCN2020Flagship.git</a> |

1406

1407 **Figure 10: An integrated multimodal census and atlas of cell types in the primary motor cortex of mouse, marmoset and human.**

1408

1409

1410 **Intermediate analyses**

1411 <https://github.com/yal054/snATACutils>

1412

1413 **Extended Data**

|                                                                                                                                                    |
|----------------------------------------------------------------------------------------------------------------------------------------------------|
| <a href="https://github.com/yal054/snATACutils">https://github.com/yal054/snATACutils</a>                                                          |
| <a href="https://github.com/lhqing/flagship_tf_figure">https://github.com/lhqing/flagship_tf_figure</a> (code and data for Extended data figure 3) |

1414

1415

1416

1417 **SUPPLEMENTARY NOTES**

1418

## A multimodal cell census and atlas of the mammalian primary motor cortex

### 1419 **Nomenclature of the L5 ET subclass of glutamatergic neurons**

1420

1421 In this manuscript we have adopted a nomenclature for major subclasses of cortical  
1422 glutamatergic excitatory neurons, which have long-range projections both within and outside of  
1423 the cortex, following a long tradition of naming conventions that often classify neurons based on  
1424 their projection targets. This nomenclature is based on our *de novo* transcriptomic taxonomy  
1425 (**Fig. 10**) that organizes cell types hierarchically and validates the naming of the primary  
1426 branches of glutamatergic neurons by their major long-range projection targets. At these levels,  
1427 glutamatergic neurons are clearly divided into several subclasses, the cortico-cortical and  
1428 cortico-striatal projecting intralencephalic (IT) neurons that are distributed across nearly all  
1429 layers (L2/3 IT, L4/5 IT, L5 IT, L6 IT and L6 IT Car3), the layer 5 neurons projecting to  
1430 extralencephalic targets (L5 ET), the cortico-thalamic (CT) projecting neurons in layer 6 (L6  
1431 CT), the near-projecting (NP) neurons found in layers 5 and 6, and the L6b neurons whose  
1432 projection patterns remain largely unknown.

1433

1434 While the IT, CT, NP and L6b neurons have been consistently labeled as such in the field, the L5  
1435 ET neurons have not been named consistently in the literature, largely due to their large variety  
1436 of projection targets and other phenotypic features that vary depending on cortical areas and  
1437 species. Here we use the term L5 ET (layer 5 extralencephalic) to refer to this prominent and  
1438 distinct subclass of neurons as a standard name that can be accurately used across cortical  
1439 regions and across species, and we provide our rationale below.

1440

1441 It has long been appreciated that cortical layer 5 contains two distinct populations of neurons that  
1442 can be distinguished, not only based on the presence or absence of projections to ET targets (ET  
1443 and IT cells), but also based on their predominant soma locations, dendritic morphologies and  
1444 intrinsic physiology<sup>81</sup>. Accordingly, various names incorporating these features have been  
1445 adopted to refer to L5 ET versus L5 IT cells, such as L5b versus L5a, thick- versus thin-tufted  
1446 and burst-firing versus regular-firing. And the most common term used to refer to L5 ET cells  
1447 residing in motor cortical areas has been PT, which refers to neurons projecting to the pyramidal  
1448 tract. As accurately stated in Wikipedia, “The **pyramidal tracts** include both the [corticobulbar tract](#)  
1449 [and the corticospinal tract](#). These are aggregations of [efferent nerve fibers](#) from the [upper motor neurons](#)  
1450 [that travel from the cerebral cortex](#) and terminate either in the [brainstem](#)  
1451 [\(corticobulbar\)](#) or [spinal cord](#) [\(corticospinal\)](#) and are involved in the control of motor functions  
1452 of the body.”

1453

1454 Due to the past wide use of the term PT, we do not take the decision to use L5 ET rather than PT  
1455 lightly. However, in the face of multiple lines of evidence that have accumulated over the last  
1456 several years<sup>115,116</sup> and prominently highlighted in this manuscript, it is now clear that PT  
1457 represents only a subset of L5 ET cells and is thus unable to accurately encompass the entire L5  
1458 ET subclass. This realization is informed by comparisons across species and cortical areas, and

## A multimodal cell census and atlas of the mammalian primary motor cortex

1459 by single-cell transcriptomics and descriptions of the projections of single neurons, as well as  
1460 studies linking transcriptional clusters to projection targets.

1461  
1462 As noted above, the overall transcriptomic relationships between cortical neurons are well-  
1463 described by a hierarchical tree that closely matches developmental lineage relationships as  
1464 neurons become progressively restricted in their adult fates<sup>45,48</sup> (**Fig. 10**). The cortical excitatory  
1465 neurons are a major branch, distinct from inhibitory, glial, and epithelial cells. Subsequent  
1466 splitting of the excitatory neurons reveals several major excitatory neuron subclasses – IT, L5  
1467 ET, L6 CT, NP and L6b. These major subclasses are conserved across mammalian species<sup>15,18</sup>,  
1468 as well as across all cortical areas as shown in mouse<sup>44</sup>. It is therefore clear that names are  
1469 needed that both accurately incorporate and accurately distinguish between neurons in these  
1470 subclasses, and which are applicable across all cortical areas.

1471  
1472 Also as noted above, a widely used alternative to L5 ET is PT. Further, this term is traditionally  
1473 used along with CT to distinguish between cells with these different projections. The two main  
1474 observations that make these alternative nomenclatures untenable are: 1) PT refers to motor  
1475 neurons that project into medulla or spinal cord, but in many cortical areas (e.g. visual and  
1476 auditory areas) none of the L5 ET cells are motor neurons; and 2) even in the motor cortex many  
1477 cells in the L5 ET subclass do not project to the pyramidal tract and instead project solely to the  
1478 thalamus (or to thalamus and other non-PT targets). This is revealed by single neuron  
1479 reconstructions<sup>26,68,86</sup> (**Fig. 6 and 9**), BARseq<sup>67</sup>, projections from neuron populations with  
1480 known gene expression and anatomical position in mouse lines<sup>71</sup>, and studies directly linking  
1481 projections to transcriptomics<sup>15,54</sup> and epigenetics<sup>79</sup> (**Fig. 5 and 9**). The term PT therefore fails  
1482 to be inclusive of the entire L5 ET subclass. Furthermore, the L5 CT cells within the L5 ET  
1483 subclass are largely continuous with PT cells (or “PT-like” cells), not only genetically but also  
1484 anatomically<sup>54,64</sup> (**Fig. 3-4**), as a majority of L5 ET cells project to multiple targets, typically  
1485 including both the thalamus and the PT structures (e.g., medulla and spinal cord), as well as the  
1486 midbrain (**Fig. 6 and 9**)<sup>68</sup>. Thus, the L5 ET subclass should neither be split into PT and CT, nor  
1487 should the CT-only cells be omitted by use of the term PT. These facts also inform us that it is  
1488 important to maintain a distinction between L5 CT (a type of L5 ET) and L6 CT (a major  
1489 subclass of cortical excitatory neurons that is highly distinct from L5 ET, despite the presence of  
1490 some L6 CT cells at the bottom of layer 5)<sup>54</sup>. CT can be accurately used as a generic term, but  
1491 CT neurons do not belong to a single subclass of cortical excitatory neurons.

1492  
1493 We recognize that another name that has been used to describe L5 ET cells is SCPN (subcerebral  
1494 projection neuron)<sup>82</sup>. Given that the telencephalon is equivalent to the cerebrum, ET and  
1495 subcerebral have the same meaning and the term L5-SCPN would be an accurate and equivalent  
1496 alternative. But the “L5” qualifier is crucial in either case in order to distinguish these cells from  
1497 the L6 CT subclass. We favor the use of ET because SCPN has not been widely adopted and due  
1498 to symmetry with the widely used “IT” nomenclature. Alternatively, given their evidence that

## A multimodal cell census and atlas of the mammalian primary motor cortex

1499 “unlike pyramidal tract neurons in the motor cortex, these neurons in the auditory cortex do not  
1500 project to the spinal cord”, Chen et al<sup>67</sup> used the term “pyramidal tract-like (PT- l).” We also  
1501 favor L5 ET over L5 PT-l which clings to an inaccurate and now outdated nomenclature.

1502  
1503

### 1504 **Supplementary Methods**

1505

#### 1506 ***Generation of *Npnt-P2A-FlpO* and *Slco2a1-P2A-Cre* mouse lines***

1507 To generate lines bearing in-frame genomic insertions of *P2A-FlpO* or *P2A-Cre*, we engineered  
1508 double-strand breaks at the stop codons of *Npnt* and *Slco2a1*, respectively, using  
1509 ribonucleoprotein (RNP) complexes composed of SpCas9-NLS protein and in vitro transcribed  
1510 sgRNA (*Npnt*: *GATGATGTGAGCTTGAAAAG* and *Slco2a1*: *CAGTCTGCAGGAGAATGCCT*).  
1511 These RNP complexes were nucleofected into 10<sup>6</sup> v6.5 mouse embryonic stem cells  
1512 (C57/BL6;129/sv; a gift from R. Jaenisch) along with repair constructs in which *P2A-FlpO* or  
1513 *P2A-Cre* was flanked with the following sequences homologous to the target site, thereby  
1514 enabling homology-directed repair.

1515

1516 *Npnt-P2A-FlpO*:

1517 TGGCCCTTGAGCTCTAGTGTCCCACTTGCCATAGAAATCTGATCTTCGGTTTGGGGG  
1518 AAGGGTTGCCTTACCATGCTCCATGAGTGAGCACTGGGAAAAGGGGCAGAGGAGGC  
1519 CTGACCAGTGTATACGTTCTCTCCCTAGGTCATCTTCAAAGGTGAAAAAAGGCGTGG  
1520 TCACACGGGGGAGATTGGATTGGATGATGTGAGCTTGAAGCGCGGAAGATGTGGAA  
1521 GCGGAGCTACTAACTTCAGCCTGCTGAAGCAGGCTGGAGACGTGGAGGAGAACCCT  
1522 GGACCTATGGCTCCTAAGAAGAAGAGGAAGGTGATGAGCCAGTTCGACATCCTGTG  
1523 CAAGACCCCGCCGAAGGTGCTGGTGCAGGAGTTCGTGGAGAGATTCGAGAGGCCCA  
1524 GCGGCGAAAAGATCGCCAGCTGTGCCGCCGAGCTGACCTACCTGTGCTGGATGATC  
1525 ACCCACAACGGCACCCGCGATCAAGAGGGCCACCTTCATGAGTTATAACACCATCAT  
1526 CAGCAACAGCCTGAGTTTTGACATCGTGAACAAGAGCCTGCAGTTCAAGTACAAGA  
1527 CCCAGAAGGCCACCATCCTGGAGGCCAGCCTGAAGAAGCTGATCCCCGCATGGGAG  
1528 TTCACGATTATCCCTTACAACGGCCAGAAGCACCAGAGCGACATCACCGACATCGT  
1529 GTCCAGCCTGCAGCTGCAGTTCGAAAGCAGCGAGGAGGCCGACAAGGGGAATAGCC  
1530 ACAGCAAGAAGATGCTGAAGGCCCTGCTGTCCGAAGGCGAGAGCATCTGGGAGATT  
1531 ACCGAGAAGATCCTGAACAGCTTCGAGTACACCAGCAGATTTACCAAACGAAGAC  
1532 CCTGTACCAGTTCCTGTTCCCTGGCCACATTCATCAACTGCGGCAGGTTTCAGCGACAT  
1533 CAAGAACGTGGACCCGAAGAGCTTCAAGCTCGTCCAGAACAAGTATCTGGGCGTGA  
1534 TCATTCAGTGCCTGGTCACGGAGACCAAGACAAGCGTGTCCAGGCACATCTACTTTT  
1535 TCAGCGCCAGAGGCAGGATCGACCCCTGGTGTACCTGGACGAGTTCCTGAGGAAC  
1536 AGCGAGCCCGTGCTGAAGAGAGTGAACAGGACCCGGCAACAGCAGCAGCAACAAGC  
1537 AGGAGTACCAGCTGCTGAAGGACAACCTGGTGCAGCTACAACAAGGCCCTGAAG  
1538 AAGAACGCCCCCTACCCCATCTTCGCTATTA AAAACGGCCCTAAGAGCCACATCGGC

## A multimodal cell census and atlas of the mammalian primary motor cortex

1539 AGGCACCTGATGACCAGCTTTCTGAGCATGAAGGGCCTGACCGAGCTGACAAACGT  
1540 GGTGGGCAACTGGAGCGACAAGAGGGCCTCCGCCGTGGCCAGGACCACCTACACCC  
1541 ACCAGATCACCGCCATCCCCGACCACTACTTCGCCCTGGTGTCCAGGTACTACGCCT  
1542 ACGACCCCATCAGTAAGGAGATGATCGCCCTGAAGGACGAGACCAACCCCATCGAG  
1543 GAGTGGCAGCACATCGAGCAGCTGAAGGGCAGCGCCGAGGGCAGCATCAGATACC  
1544 CCGCCTGGAACGGCATTATAAGCCAGGAGGTGCTGGACTACCTGAGCAGCTACATC  
1545 AACAGGCGGATCTGAAAGAGGTGCTGCTGAGAAGACCCCTGGCAGCTCCCGAGCT  
1546 AGCAGTGAATTTGTGCTCTCCCTCATTTCCTCAATGCTTGCCCTCTTGTCTCCCTCTTA  
1547 TCAGGCCTAGGGCAGGAGTGGGTCAGGAGGAAGGTTGCTTGGTGACTIONCGGGTCTCG  
1548 GTGGCCTGTTTTGGTGAATCCCAGTGAACAGTGACACTCTCGAAGTACAGGAGCAT  
1549 CTGGAGACACCTCCGGGCCCTTCTG  
1550  
1551 Slco2a1-P2A-Cre:  
1552 TGCCCCTGGGCCTCACCATACCTGTCTCTTCTGCCTCATAGGTACCTGGGCCTACAG  
1553 GTAATCTACAAGGTCTTGGGCACACTGCTGCTCTTCTTCATCAGCTGGAGGGTGAAG  
1554 AAGAACAGGGAATACAGTCTGCAGGAGAATGCTTCCGGATTGATTGGAAGCGGAGC  
1555 TACTAACTTCTCCCTGTTGAAACAAGCAGGGGATGTGCGAAGAGAATCCTGGACCTAT  
1556 GGCTCCTAAGAAGAAGAGGAAGGTGATGAGCCAGTTCGACATCCTGTGCAAGACTC  
1557 CTCCAAAGGTGCTGGTGCAGGAGTTCGTGGAGAGATTGAGAGGCCCAGCGGCGAG  
1558 AAGATCGCCAGCTGTGCCGCCGAGCTGACCTACCTGTGCTGGATGATCACCCACAAC  
1559 GGCACCGCCATCAAGAGGGCCACCTTCATGAGCTACAACACCATCATCAGCAACAG  
1560 CCTGAGCTTCGACATCGTGAACAAGAGCCTGCAGTTCAAGTACAAGACCCAGAAGG  
1561 CCACCATCCTGGAGGCCAGCCTGAAGAAGCTGATCCCCGCCTGGGAGTTCACCATC  
1562 ATCCCTTACAACGGCCAGAAGCACCAGAGCGACATCACCGACATCGTGTCCAGCCT  
1563 GCAGCTGCAGTTCGAGAGCAGCGAGGAGGCCGACAAGGGCAACAGCCACAGCAAG  
1564 AAGATGCTGAAGGCCCTGCTGTCCGAGGGCGAGAGCATCTGGGAGATCACCGAGAA  
1565 GATCCTGAACAGCTTCGAGTACACCAGCAGGTTACCAAGACCAAGACCCTGTACC  
1566 AGTTCCTGTTCTGGCCACATTCATCAACTGCGGCAGGTTACAGCGACATCAAGAACG  
1567 TGGACCCCAAGAGCTTCAAGCTGGTGCAGAACAAGTACCTGGGCGTGATCATTAG  
1568 TGCCTGGTGAACGAGACCAAGACAAGCGTGTCCAGGCACATCTACTTTTTTCAGCGCC  
1569 AGAGGCAGGATCGACCCCTGGTGTACCTGGACGAGTTCCTGAGGAACAGCGAGCC  
1570 CGTGCTGAAGAGAGTGAACAGGACCGGCAACAGCAGCAGCAACAAGCAGGAGTAC  
1571 CAGCTGCTGAAGGACAACCTGGTGCAGCTACAACAAGGCCCTGAAGAAGAACGC  
1572 CCCCTACCCATCTTCGCTATCAAGAACGGCCCTAAGAGCCACATCGGCAGGCACCT  
1573 GATGACCAGCTTTCTGAGCATGAAGGGCCTGACCGAGCTGACAAACGTGGTGGGCA  
1574 ACTGGAGCGACAAGAGGGCCTCCGCCGTGGCCAGGACCACCTACACCACCAGATC  
1575 ACCGCCATCCCCGACCACTACTTCGCCCTGGTGTCCAGGTACTACGCCTACGACCCC  
1576 ATCAGCAAGGAGATGATCGCCCTGAAGGACGAGACCAACCCCATCGAGGAGTGGCA  
1577 GCACATCGAGCAGCTGAAGGGCAGCGCCGAGGGCAGCATCAGATACCCCGCCTGGA  
1578 ACGGCATCATCAGCCAGGAGGTGCTGGACTACCTGAGCAGCTACATCAACAGGCGG

## A multimodal cell census and atlas of the mammalian primary motor cortex

1579 ATCTGACCTTCAGCTGGGACTACTGCCCTGCCCCAGAGACTGGATATCCTACCCCTC  
1580 CACACCTACCTATATTAATAATGTTAGCATGCCTTCCTCCTCTTCC

1581

1582 Transfected cells were cultured and resulting colonies directly screened by PCR for correct  
1583 integration using the following genotyping primers:

### 1584 **Genotyping primers**

|                                    | Flanking Primer          | Internal recombinase Primer |
|------------------------------------|--------------------------|-----------------------------|
| Npnt-P2A-FlpO Left homology arm    | ATGCATTGCTTCATGCCATA     | CCTTCAGCAGCTGGTACTCC        |
| Npnt-P2A-FlpO right homology arm   | GATTGAGGTCAGGCCAGAAG     | TCGACATCGTGAACAAGAGC        |
| Slco2a1-P2A-Cre Left homology arm  | CTGGTGAAAGGGGA ACTCTTGCT | GATCCCTGAACATGTCCATCAGG     |
| Slco2a1-P2A-Cre Right homology arm | TACAGCATCCCTGACAAACACCA  | TAGCACCGCAGGTGTAGAGAAGG     |

1585

1586 The inserted transgenes were fully sequenced and candidate lines were analyzed for normal  
1587 karyotype. Lines passing quality control were aggregated with albino morulae and implanted  
1588 into pseudopregnant females, producing germline-competent chimeric founders which in turn  
1589 were crossed with the appropriate reporter lines on the C57/BL6 background.

1590

1591

### 1592 **ACKNOWLEDGEMENTS**

1593

1594 We thank additional members of our laboratories and institutions who contributed to the  
1595 experimental and analytical components of this project. This work was supported by grants from  
1596 the NIH under: 1U24MH114827, 1U19MH114831, 1U19MH114821, 1U01MH117072,  
1597 1U19MH114830, 1U01MH114829, 1U01MH121282, 1U01MH117023, 1U01MH114825,  
1598 1U01MH114819, 1U01MH114812, 1U01MH121260, 1U01MH114824, 1U01MH117079,  
1599 1U01MH116990, 1U01MH114828, 1R24MH117295, 5R24MH114793, 5R24MH114788,  
1600 5R24MH114815. We thank NIH BICCN program officers, in particular Dr. Yong Yao, for their  
1601 guidance and support throughout this study.

1602

1603 Additional support:



## A multimodal cell census and atlas of the mammalian primary motor cortex

1604 NIH grants R01NS39600 and R01NS86082 to G.A.A. H.S.B. is a Chan Zuckerberg Biohub  
1605 Investigator. Deutsche Forschungsgemeinschaft through a Heisenberg Professorship (BE5601/4-  
1606 1), the Cluster of Excellence “Machine Learning --- New Perspectives for Science” (EXC 2064,  
1607 project number 390727645) and the Collaborative Research Center 1233 “Robust Vision”  
1608 (project number 276693517), the German Federal Ministry of Education and Research (FKZ  
1609 01GQ1601 and 01IS18039A) to P.B. This work was supported in part by the Flow Cytometry  
1610 Core Facility of the Salk Institute with funding from NIH-NCI CCSG: P30 014195 and Shared  
1611 Instrumentation Grant S10-OD023689. NIH/NIMH R01MH094360 to H.W.D. We thank  
1612 Marlene Becerra, Tyler Boesen, Chunru Cao, Marina Fayzullina, Kaelan Cotter, Lei Gao, Luis  
1613 Gacia, Laura Korobkova, Darrick Lo, Christine Mun, Seita Yamashita, Muye Zhu for their  
1614 technical and informatics support. Howard Hughes Medical Institute for J.E. This work was  
1615 supported in part by the NNSFC grant 61890953 to H.G. Hearing Health Foundation Hearing  
1616 Restoration Project grant to R.H. NIH grant OD010425 to G.D.H. This work is supported in part  
1617 by NIH BRAIN Initiative award RF1MH114126 from the National Institute of Mental Health to  
1618 E.S.L., J.T.T., and B.P.L. This work was supported in part by the NNSFC grant 81827901 to  
1619 Q.L. This project was supported in part by NIH grants P51OD010425 from the Office of  
1620 Research Infrastructure Programs (ORIP) and UL1TR000423 from the National Center for  
1621 Advancing Translational Sciences (NCATS). Its contents are solely the responsibility of the  
1622 authors and do not necessarily represent the official view of NIH, ORIP, NCATS, the Institute of  
1623 Translational Health Sciences at the Washington National Primate Research Center. NSFC grant  
1624 61871411 and the University Synergy Innovation Program of Anhui Province GXXT-2019-008  
1625 to L.Q. Howard Hughes Medical Institute and the Klarman Cell Observatory for A.R. Howard  
1626 Hughes Medical Institute for X.Z. V.D.B. is a postdoctoral fellow from the Belgian American  
1627 Educational Foundation, and is supported by the Research Foundation Flanders (FWO), grant  
1628 number 1246220N. NSFC Grant No. 32071367 and NSF Shanghai Grant No. 20ZR1420100 to  
1629 Y.W. NIH grants R01EY023173 and U01MH105982 to H.Z. Researchers from Allen Institute  
1630 for Brain Science wish to thank the Allen Institute founder, Paul G. Allen, for his vision,  
1631 encouragement, and support.

1632

### 1633 AUTHOR INFORMATION

1634

1635 BRAIN Initiative Cell Census Network (BICCN)

1636

### 1637 Corresponding authors

1638 Edward M. Callaway<sup>1</sup>, Hong-Wei Dong<sup>2,†</sup>, Joseph R. Ecker<sup>3,4</sup>, Mike Hawrylycz<sup>5</sup>, Z. Josh  
1639 Huang<sup>6,†</sup>, Ed S. Lein<sup>5</sup>, John Ngai<sup>7,8,†</sup>, Pavel Osten<sup>6</sup>, Bing Ren<sup>9,10</sup>, Andreas Savas Tolias<sup>11,12</sup>,  
1640 Owen White<sup>13</sup>, Hongkui Zeng<sup>5</sup>, Xiaowei Zhuang<sup>14</sup>

1641

### 1642 BICCN Contributing PI

## A multimodal cell census and atlas of the mammalian primary motor cortex

1643 Giorgio A. Ascoli<sup>15,16</sup>, M. Margarita Behrens<sup>17</sup>, Edward M. Callaway<sup>1</sup>, Jerold Chun<sup>18</sup>, Hong-Wei  
1644 Dong<sup>2,†</sup>, Joseph R. Ecker<sup>3,4</sup>, Guoping Feng<sup>19,20,21</sup>, James C. Gee<sup>22</sup>, Satrajit S. Ghosh<sup>23</sup>, Yaroslav  
1645 O. Halchenko<sup>24</sup>, Mike Hawrylycz<sup>5</sup>, Ronna Hertzano<sup>13,25</sup>, Z. Josh Huang<sup>6,†</sup>, Ed S. Lein<sup>5</sup>,  
1646 Byungkook Lim<sup>26</sup>, Maryann E. Martone<sup>27,28</sup>, Lydia Ng<sup>5</sup>, John Ngai<sup>7,8,†</sup>, Pavel Osten<sup>6</sup>, Lior  
1647 Pachter<sup>29</sup>, Alexander J Ropelewski<sup>30</sup>, Timothy L. Tickle<sup>31</sup>, Andreas Savas Tolias<sup>11,12</sup>, Owen  
1648 White<sup>13</sup>, X. William Yang<sup>32,33</sup>, Hongkui Zeng<sup>5</sup>, Kun Zhang<sup>34</sup>, Xiaowei Zhuang<sup>14</sup>

1649

### 1650 **Principal manuscript editors**

1651 Z. Josh Huang<sup>6,†</sup>, Ed S. Lein<sup>5</sup>, Hongkui Zeng<sup>5</sup>

1652

### 1653 **Manuscript writing and figure generation**

1654 Giorgio A. Ascoli<sup>15,16</sup>, Trygve E. Bakken<sup>5</sup>, Philipp Berens<sup>35,36,37,38</sup>, Edward M. Callaway<sup>1</sup>, Tanya  
1655 L. Daigle<sup>5</sup>, Hong-Wei Dong<sup>2,†</sup>, Joseph R. Ecker<sup>3,4</sup>, Julie A. Harris<sup>5,†</sup>, Mike Hawrylycz<sup>5</sup>, Z. Josh  
1656 Huang<sup>6,†</sup>, Nikolas L. Jorstad<sup>5</sup>, Brian E. Kalmbach<sup>5,39</sup>, Dmitry Kobak<sup>35</sup>, Ed S. Lein<sup>5</sup>, Yang Eric  
1657 Li<sup>10</sup>, Hanqing Liu<sup>3,40</sup>, Katherine S. Matho<sup>6</sup>, Eran A. Mukamel<sup>41</sup>, Maitham Naeemi<sup>5</sup>, John  
1658 Ngai<sup>7,8,†</sup>, Pavel Osten<sup>6</sup>, Bing Ren<sup>9,10</sup>, Federico Scala<sup>11,12</sup>, Pengcheng Tan<sup>3,42</sup>, Jonathan T. Ting<sup>5,39</sup>,  
1659 Andreas Savas Tolias<sup>11,12</sup>, Fangming Xie<sup>43</sup>, Hongkui Zeng<sup>5</sup>, Meng Zhang<sup>14</sup>, Zhuzhu Zhang<sup>3</sup>,  
1660 Jingtian Zhou<sup>3,44</sup>, Xiaowei Zhuang<sup>14</sup>, Brian Zingg<sup>2,†</sup>

1661

### 1662 **Analysis coordination**

1663 Trygve E. Bakken<sup>5</sup>, Edward M. Callaway<sup>1</sup>, Hong-Wei Dong<sup>2,†</sup>, Joseph R. Ecker<sup>3,4</sup>, Julie A.  
1664 Harris<sup>5,†</sup>, Mike Hawrylycz<sup>5</sup>, Z. Josh Huang<sup>6,†</sup>, Ed S. Lein<sup>5</sup>, Eran A. Mukamel<sup>41</sup>, John Ngai<sup>7,8,†</sup>,  
1665 Pavel Osten<sup>6</sup>, Bing Ren<sup>9,10</sup>, Andreas Savas Tolias<sup>11,12</sup>, Hongkui Zeng<sup>5</sup>, Xiaowei Zhuang<sup>14</sup>

1666

### 1667 **Integrated data analysis**

1668 Ethan Armand<sup>41</sup>, Trygve E. Bakken<sup>5</sup>, Philipp Berens<sup>35,36,37,38</sup>, Hong-Wei Dong<sup>2,†</sup>, Joseph R.  
1669 Ecker<sup>3,4</sup>, Julie A. Harris<sup>5,†</sup>, Z. Josh Huang<sup>6,†</sup>, Nikolas L. Jorstad<sup>5</sup>, Brian E. Kalmbach<sup>5,39</sup>, Dmitry  
1670 Kobak<sup>35</sup>, Ed S. Lein<sup>5</sup>, Yang Eric Li<sup>10</sup>, Hanqing Liu<sup>3,40</sup>, Eran A. Mukamel<sup>41</sup>, Pavel Osten<sup>6</sup>, Bing  
1671 Ren<sup>9,10</sup>, Federico Scala<sup>11,12</sup>, Pengcheng Tan<sup>3,42</sup>, Andreas Savas Tolias<sup>11,12</sup>, Fangming Xie<sup>43</sup>,  
1672 Zizhen Yao<sup>5</sup>, Hongkui Zeng<sup>5</sup>, Meng Zhang<sup>14</sup>, Zhuzhu Zhang<sup>3</sup>, Jingtian Zhou<sup>3,44</sup>, Xiaowei  
1673 Zhuang<sup>14</sup>

1674

### 1675 **Sc/snRNA-seq data generation and processing**

1676 Darren Bertagnolli<sup>5</sup>, Tamara Casper<sup>5</sup>, Jerold Chun<sup>18</sup>, Kirsten Crichton<sup>5</sup>, Nick Dee<sup>5</sup>, Dinh Diep<sup>34</sup>,  
1677 Song-Lin Ding<sup>5</sup>, Weixiu Dong<sup>34</sup>, Elizabeth L. Dougherty<sup>45</sup>, Guoping Feng<sup>19,20,21</sup>, Olivia Fong<sup>5</sup>,  
1678 Melissa Goldman<sup>46</sup>, Jeff Goldy<sup>5</sup>, Rebecca D. Hodge<sup>5</sup>, Lijuan Hu<sup>47</sup>, C. Dirk Keene<sup>48</sup>, Fenna M.  
1679 Krienen<sup>46</sup>, Matthew Kroll<sup>5</sup>, Blue B. Lake<sup>34</sup>, Kanan Lathia<sup>5</sup>, Ed S. Lein<sup>5</sup>, Sten Linnarsson<sup>47</sup>,  
1680 Christine S. Liu<sup>18,49</sup>, Evan Z. Macosko<sup>45</sup>, Steven A. McCarroll<sup>45,46</sup>, Delissa McMillen<sup>5</sup>, Naeem  
1681 M. Nadaf<sup>45</sup>, Thuc Nghi Nguyen<sup>5,†</sup>, Carter R. Palmer<sup>18,49</sup>, Thanh Pham<sup>5</sup>, Nongluk  
1682 Plongthongkum<sup>34</sup>, Nora M. Reed<sup>46</sup>, Aviv Regev<sup>45,50,†</sup>, Christine Rimorin<sup>5</sup>, William J.

## A multimodal cell census and atlas of the mammalian primary motor cortex

1683 Romanow<sup>18,49</sup>, Steven Savoia<sup>6</sup>, Kimberly Siletti<sup>47</sup>, Kimberly Smith<sup>5</sup>, Josef Sulc<sup>5</sup>, Bosiljka Tasic<sup>5</sup>,  
1684 Michael Tieu<sup>5</sup>, Amy Torkelson<sup>5</sup>, Herman Tung<sup>5</sup>, Cindy T.J. van Velthoven<sup>5</sup>, Charles R.  
1685 Vanderburg<sup>45</sup>, Anna Marie Yanny<sup>5</sup>, Hongkui Zeng<sup>5</sup>, Kun Zhang<sup>34</sup>

1686

### 1687 **ATAC-seq data generation and processing**

1688 M. Margarita Behrens<sup>17</sup>, Jerold Chun<sup>18</sup>, Dinh Diep<sup>34</sup>, Weixiu Dong<sup>34</sup>, Rongxin Fang<sup>44</sup>,  
1689 Xiaomeng Hou<sup>9</sup>, Blue B. Lake<sup>34</sup>, Yang Eric Li<sup>10</sup>, Christine S. Liu<sup>18,49</sup>, Jacinta D. Lucero<sup>17</sup>, Julia  
1690 K. Osteen<sup>17</sup>, Carter R. Palmer<sup>18,49</sup>, Antonio Pinto-Duarte<sup>17</sup>, Nongluk Plongthongkum<sup>34</sup>, Olivier  
1691 Poirion<sup>9</sup>, Sebastian Preissl<sup>9</sup>, Bing Ren<sup>9,10</sup>, William J. Romanow<sup>18,49</sup>, Xinxin Wang<sup>9,†</sup>, Kun  
1692 Zhang<sup>34</sup>

1693

### 1694 **Methylcytosine data production and analysis**

1695 Andrew I. Aldridge<sup>3</sup>, Anna Bartlett<sup>3</sup>, M. Margarita Behrens<sup>17</sup>, Lara Boggeman<sup>51</sup>, Carolyn  
1696 O'Connor<sup>51</sup>, Rosa G. Castanon<sup>3</sup>, Huaming Chen<sup>3</sup>, Joseph R. Ecker<sup>3,4</sup>, Conor Fitzpatrick<sup>51</sup>,  
1697 Hanqing Liu<sup>3,40</sup>, Jacinta D. Lucero<sup>17</sup>, Chongyuan Luo<sup>3,4,†</sup>, Joseph R. Nery<sup>3</sup>, Michael Nunn<sup>3</sup>, Julia  
1698 K. Osteen<sup>17</sup>, Antonio Pinto-Duarte<sup>17</sup>, Angeline C. Rivkin<sup>3</sup>, Wei Tian<sup>3</sup>, Jingtian Zhou<sup>3,44</sup>

1699

### 1700 **Epi-Retro-Seq data generation and processing**

1701 Anna Bartlett<sup>3</sup>, M. Margarita Behrens<sup>17</sup>, Lara Boggeman<sup>51</sup>, Edward M. Callaway<sup>1</sup>, Carolyn  
1702 O'Connor<sup>51</sup>, Rosa G. Castanon<sup>3</sup>, Bertha Dominguez<sup>52</sup>, Joseph R. Ecker<sup>3,4</sup>, Conor Fitzpatrick<sup>51</sup>,  
1703 Tony Ito-Cole<sup>1</sup>, Matthew Jacobs<sup>1</sup>, Xin Jin<sup>53</sup>, Cheng-Ta Lee<sup>52</sup>, Kuo-Fen Lee<sup>52</sup>, Paula Assakura  
1704 Miyazaki<sup>1</sup>, Eran A. Mukamel<sup>41</sup>, Joseph R. Nery<sup>3</sup>, Michael Nunn<sup>3</sup>, Yan Pang<sup>1</sup>, Antonio Pinto-  
1705 Duarte<sup>17</sup>, Mohammad Rashid<sup>1</sup>, Angeline C. Rivkin<sup>3</sup>, Jared B. Smith<sup>53</sup>, Pengcheng Tan<sup>3,42</sup>, Minh  
1706 Vu<sup>1</sup>, Elora Williams<sup>53</sup>, Zhuzhu Zhang<sup>3</sup>, Jingtian Zhou<sup>3,44</sup>

1707

### 1708 **Omics data analysis**

1709 Ethan Armand<sup>41</sup>, Trygve E. Bakken<sup>5</sup>, Tommaso Biancalani<sup>45</sup>, A. Sina Boeshaghi<sup>29</sup>, Megan  
1710 Crow<sup>54</sup>, Dinh Diep<sup>34</sup>, Sandrine Dudoit<sup>55</sup>, Joseph R. Ecker<sup>3,4</sup>, Rongxin Fang<sup>44</sup>, Stephan Fischer<sup>54</sup>,  
1711 Olivia Fong<sup>5</sup>, Jesse Gillis<sup>54</sup>, Jeff Goldy<sup>5</sup>, Qiwen Hu<sup>56</sup>, Nikolas L. Jorstad<sup>5</sup>, Peter V.  
1712 Kharchenko<sup>56</sup>, Fenna M. Krienen<sup>46</sup>, Blue B. Lake<sup>34</sup>, Ed S. Lein<sup>5</sup>, Yang Eric Li<sup>10</sup>, Sten  
1713 Linnarsson<sup>47</sup>, Hanqing Liu<sup>3,40</sup>, Evan Z. Macosko<sup>45</sup>, Eran A. Mukamel<sup>41</sup>, John Ngai<sup>7,8,†</sup>, Sheng-  
1714 Yong Niu<sup>3</sup>, Vasilis Ntranos<sup>57</sup>, Lior Pachter<sup>29</sup>, Olivier Poirion<sup>9</sup>, Elizabeth Purdom<sup>58</sup>, Aviv  
1715 Regev<sup>45,50,†</sup>, Davide Risso<sup>59</sup>, Hector Roux de Bézieux<sup>60</sup>, Kimberly Siletti<sup>47</sup>, Kimberly Smith<sup>5</sup>,  
1716 Saroja Somasundaram<sup>5</sup>, Kelly Street<sup>61</sup>, Valentine Svensson<sup>29</sup>, Bosiljka Tasic<sup>5</sup>, Wei Tian<sup>3</sup>, Eeshit  
1717 Dhaval Vaishnav<sup>45</sup>, Koen Van den Berge<sup>58,62</sup>, Cindy T.J. van Velthoven<sup>5</sup>, Joshua D. Welch<sup>63</sup>,  
1718 Fangming Xie<sup>43</sup>, Zizhen Yao<sup>5</sup>, Hongkui Zeng<sup>5</sup>, Jingtian Zhou<sup>3,44</sup>

1719

### 1720 **Tracing and connectivity data generation**

1721 Xu An<sup>6</sup>, Helen S. Bateup<sup>7,8,64</sup>, Ian Bowman<sup>2,†</sup>, Rebecca K. Chance<sup>7</sup>, Hong-Wei Dong<sup>2,†</sup>, Nicholas  
1722 N. Foster<sup>2,†</sup>, William Galbavy<sup>6,66</sup>, Hui Gong<sup>65,67</sup>, Lin Gou<sup>2,†</sup>, Julie A. Harris<sup>5,†</sup>, Joshua T.

## A multimodal cell census and atlas of the mammalian primary motor cortex

1723 Hatfield<sup>6</sup>, Hourii Hintiryan<sup>2,†</sup>, Karla E. Hirokawa<sup>5,†</sup>, Z. Josh Huang<sup>6,†</sup>, Gukhan Kim<sup>6</sup>, Daniel J.  
1724 Kramer<sup>7</sup>, Anan Li<sup>65,67</sup>, Xiangning Li<sup>65</sup>, Byungkook Lim<sup>26</sup>, Qingming Luo<sup>67,68</sup>, Katherine S.  
1725 Matho<sup>6</sup>, Lydia Ng<sup>5</sup>, John Ngai<sup>7,8,†</sup>, Rodrigo Muñoz-Castañeda<sup>6</sup>, David A. Stafford<sup>7</sup>, Hongkui  
1726 Zeng<sup>5</sup>, Brian Zingg<sup>2,†</sup>

1727

### 1728 **Morphology data generation and reconstruction**

1729 Tanya L. Daigle<sup>5</sup>, Hong-Wei Dong<sup>2,†</sup>, Zhao Feng<sup>65</sup>, Hui Gong<sup>65,67</sup>, Julie A. Harris<sup>5,†</sup>, Karla E.  
1730 Hirokawa<sup>5,†</sup>, Z. Josh Huang<sup>6,†</sup>, Xueyan Jia<sup>67</sup>, Shengdian Jiang<sup>69</sup>, Tao Jiang<sup>67</sup>, Xiuli Kuang<sup>70</sup>,  
1731 Rachael Larsen<sup>5</sup>, Phil Lesnar<sup>5</sup>, Anan Li<sup>65,67</sup>, Xiangning Li<sup>65</sup>, Yaoyao Li<sup>70</sup>, Yuanyuan Li<sup>71</sup>, Lijuan  
1732 Liu<sup>69</sup>, Qingming Luo<sup>67,68</sup>, Hanchuan Peng<sup>69</sup>, Lei Qu<sup>72</sup>, Miao Ren<sup>68</sup>, Zongcai Ruan<sup>69</sup>, Elise Shen<sup>5</sup>,  
1733 Yuanyuan Song<sup>69</sup>, Wayne Wakeman<sup>5</sup>, Peng Wang<sup>73</sup>, Yimin Wang<sup>74</sup>, Yun Wang<sup>5</sup>, Lulu Yin<sup>69</sup>,  
1734 Jing Yuan<sup>65,67</sup>, Hongkui Zeng<sup>5</sup>, Sujun Zhao<sup>69</sup>, Xuan Zhao<sup>69</sup>

1735

### 1736 **OLST/STPT and other data generation**

1737 Xu An<sup>6</sup>, William Galbavy<sup>6,66</sup>, Joshua T. Hatfield<sup>6</sup>, Z. Josh Huang<sup>6,†</sup>, Gukhan Kim<sup>6</sup>, Katherine S.  
1738 Matho<sup>6</sup>, Arun Narasimhan<sup>6</sup>, Pavel Osten<sup>6</sup>, Ramesh Palaniswamy<sup>6</sup>, Rodrigo Muñoz-Castañeda<sup>6</sup>

1739

### 1740 **Morphology, connectivity and imaging analysis**

1741 Xu An<sup>6</sup>, Giorgio A. Ascoli<sup>15,16</sup>, Samik Banerjee<sup>6</sup>, Liya Ding<sup>69</sup>, Hong-Wei Dong<sup>2,†</sup>, Zhao Feng<sup>65</sup>,  
1742 Nicholas N. Foster<sup>2,†</sup>, William Galbavy<sup>6,66</sup>, Hui Gong<sup>65,67</sup>, Julie A. Harris<sup>5,†</sup>, Joshua T. Hatfield<sup>6</sup>,  
1743 Z. Josh Huang<sup>6,†</sup>, Bingxing Huo<sup>6</sup>, Xueyan Jia<sup>67</sup>, Gukhan Kim<sup>6</sup>, Hsien-Chi Kuo<sup>5</sup>, Sophie  
1744 Laternus<sup>35</sup>, Anan Li<sup>65,67</sup>, Xu Li<sup>6</sup>, Katherine S. Matho<sup>6</sup>, Partha P Mitra<sup>6</sup>, Judith Mizrachi<sup>6</sup>,  
1745 Maitham Naeemi<sup>5</sup>, Arun Narasimhan<sup>6</sup>, Lydia Ng<sup>5</sup>, Pavel Osten<sup>6</sup>, Ramesh Palaniswamy<sup>6</sup>,  
1746 Hanchuan Peng<sup>69</sup>, Rodrigo Muñoz-Castañeda<sup>6</sup>, Quanxin Wang<sup>5</sup>, Yimin Wang<sup>74</sup>, Yun Wang<sup>5</sup>,  
1747 Peng Xie<sup>69</sup>, Feng Xiong<sup>69</sup>, Yang Yu<sup>5</sup>, Hongkui Zeng<sup>5</sup>

1748

### 1749 **Spatially resolved single-cell transcriptomics (MERFISH)**

1750 Hong-Wei Dong<sup>2,†</sup>, Stephen W. Eichhorn<sup>14</sup>, Zizhen Yao<sup>5</sup>, Hongkui Zeng<sup>5</sup>, Meng Zhang<sup>14</sup>,  
1751 Xiaowei Zhuang<sup>14</sup>, Brian Zingg<sup>2,†</sup>

1752

### 1753 **Multimodal profiling (Patch-seq)**

1754 Philipp Berens<sup>35,36,37,38</sup>, Jim Berg<sup>5</sup>, Matteo Bernabucci<sup>11,12</sup>, Yves Bornaerts<sup>35</sup>, Cathryn René  
1755 Cadwell<sup>75</sup>, Jesus Ramon Castro<sup>11,12</sup>, Rachel Dalley<sup>5</sup>, Leonard Hartmanis<sup>76</sup>, Gregory D.  
1756 Horwitz<sup>39,77</sup>, Xiaolong Jiang<sup>11,12,78</sup>, Brian E. Kalmbach<sup>5,39</sup>, C. Dirk Keene<sup>48</sup>, Andrew L. Ko<sup>79,80</sup>,  
1757 Dmitry Kobak<sup>35</sup>, Sophie Laternus<sup>35</sup>, Ed S. Lein<sup>5</sup>, Elanine Miranda<sup>11,12</sup>, Shalaka Mulherkar<sup>11,12</sup>,  
1758 Philip R. Nicovich<sup>5,†</sup>, Scott F. Owen<sup>5,†</sup>, Rickard Sandberg<sup>76</sup>, Federico Scala<sup>11,12</sup>, Kimberly  
1759 Smith<sup>5</sup>, Staci A. Sorensen<sup>5</sup>, Zheng Huan Tan<sup>11,12</sup>, Jonathan T. Ting<sup>5,39</sup>, Andreas Savas Tolias<sup>11,12</sup>,  
1760 Hongkui Zeng<sup>5</sup>

1761

### 1762 **Transgenic tools**

## A multimodal cell census and atlas of the mammalian primary motor cortex

1763 Shona Allen<sup>7</sup>, Xu An<sup>6</sup>, Helen S. Bateup<sup>7,8,64</sup>, Rebecca K. Chance<sup>7</sup>, Tanya L. Daigle<sup>5</sup>, William  
1764 Galbavy<sup>6,66</sup>, Joshua T. Hatfield<sup>6</sup>, Dirk Hockemeyer<sup>7,64,81</sup>, Z. Josh Huang<sup>6,†</sup>, Gukhan Kim<sup>6</sup>,  
1765 Rodrigo Muñoz-Castañeda<sup>7</sup>, Angus Y. Lee<sup>82</sup>, Katherine S. Matho<sup>6</sup>, John Ngai<sup>7,8,†</sup>, David A.  
1766 Stafford<sup>7</sup>, Bosiljka Tasic<sup>5</sup>, Matthew B. Veldman<sup>32,33</sup>, X. William Yang<sup>32,33</sup>, Zizhen Yao<sup>5</sup>,  
1767 Hongkui Zeng<sup>5</sup>

1768

### 1769 **NeMO archive and analytics**

1770 Ricky S. Adkins<sup>13</sup>, Seth A. Ament<sup>13,83</sup>, Héctor Corrada Bravo<sup>84</sup>, Robert Carter<sup>13</sup>, Apaala  
1771 Chatterjee<sup>13</sup>, Carlo Colantuoni<sup>13,85</sup>, Jonathan Crabtree<sup>13</sup>, Heather Creasy<sup>13</sup>, Victor Felix<sup>13</sup>,  
1772 Michelle Giglio<sup>13</sup>, Brian R. Herb<sup>13</sup>, Ronna Hertzano<sup>13,25</sup>, Jayaram Kancherla<sup>84</sup>, Anup  
1773 Mahurkar<sup>13</sup>, Carrie McCracken<sup>13</sup>, Lance Nickel<sup>13</sup>, Dustin Olley<sup>13</sup>, Joshua Orvis<sup>13</sup>, Michael  
1774 Schor<sup>13</sup>, Owen White<sup>13</sup>

1775

### 1776 **Brain Image Library (BIL) archive**

1777 Greg Hood<sup>30</sup>, Alexander J Ropelewski<sup>30</sup>

1778

### 1779 **DANDI archive**

1780 Benjamin Dichter<sup>86</sup>, Satrajit S. Ghosh<sup>23</sup>, Michael Grauer<sup>87</sup>, Yaroslav O. Halchenko<sup>24</sup>, Brian  
1781 Helba<sup>87</sup>

1782

### 1783 **Brain Cell Data Center (BCDC)**

1784 Anita Bandrowski<sup>27</sup>, Nikolaos Barkas<sup>88</sup>, Benjamin Carlin<sup>88</sup>, Florence D. D'Orazi<sup>5</sup>, Kylee  
1785 Degatano<sup>88</sup>, James C. Gee<sup>22</sup>, Thomas H Gillespie<sup>27</sup>, Mike Hawrylycz<sup>5</sup>, Farzaneh Khajouei<sup>31</sup>,  
1786 Kishori Konwar<sup>31</sup>, Maryann E. Martone<sup>27,28</sup>, Lydia Ng<sup>5</sup>, Carol Thompson<sup>5</sup>, Timothy L. Tickle<sup>31</sup>

1787

### 1788 **Project management**

1789 Philipp Berens<sup>35,36,37,38</sup>, Florence D. D'Orazi<sup>5</sup>, Hui Gong<sup>65,67</sup>, Houri Hintiryan<sup>2,†</sup>, Kathleen Kelly<sup>6</sup>,  
1790 Dmitry Kobak<sup>35</sup>, Blue B. Lake<sup>34</sup>, Katherine S. Matho<sup>6</sup>, Stephanie Mok<sup>5</sup>, Michael Nunn<sup>3</sup>,  
1791 Federico Scala<sup>11,12</sup>, Susan Sunkin<sup>5</sup>, Carol Thompson<sup>5</sup>

1792

### 1793 **Affiliations**

1794 1) Systems Neurobiology Laboratories, The Salk Institute for Biological Studies, La Jolla, CA  
1795 92037

1796 2) Center for Integrative Connectomics, USC Mark and Mary Stevens Neuroimaging and  
1797 Informatics Institute, Department of Neurology, Zilkha Neurogenetic Institute, Keck School of  
1798 Medicine at USC, University of Southern California, Los Angeles, CA 90033

1799 3) Genomic Analysis Laboratory, The Salk Institute for Biological Studies, La Jolla, CA 92037

1800 4) Howard Hughes Medical Institute, The Salk Institute for Biological Studies, 10010 N. Torrey  
1801 Pines Road, La Jolla, CA 92037

1802 5) Allen Institute for Brain Science, Seattle, WA, 98109

## A multimodal cell census and atlas of the mammalian primary motor cortex

- 1803 6) Cold Spring Harbor Laboratory, Cold Spring Harbor, NY 11724  
1804 7) Department of Molecular and Cell Biology, University of California, Berkeley, CA 94720  
1805 8) Helen Wills Neuroscience Institute, University of California, Berkeley, CA 94720  
1806 9) Center for Epigenomics, Department of Cellular and Molecular Medicine, University of  
1807 California, San Diego School of Medicine, La Jolla, CA, USA  
1808 10) Ludwig Institute for Cancer Research, 9500 Gilman Drive, La Jolla, CA 92093, USA  
1809 11) Department of Neuroscience, Baylor College of Medicine, Houston, TX, 77030, USA  
1810 12) Center for Neuroscience and Artificial Intelligence, Baylor College of Medicine, Houston,  
1811 TX, 77030, USA  
1812 13) Institute for Genome Sciences, University of Maryland School of Medicine, Baltimore, MD  
1813 14) Howard Hughes Medical Institute, Department of Chemistry and Chemical Biology,  
1814 Department of Physics, Harvard University, Cambridge, MA 02138, USA.  
1815 15) Center for Neural Informatics, Krasnow Institute for Advanced Study, George Mason  
1816 University, Fairfax, VA, USA  
1817 16) Bioengineering Department, George Mason University, Fairfax, VA, USA.  
1818 17) Computational Neurobiology Laboratory, The Salk Institute for Biological Studies, La Jolla,  
1819 CA 92037  
1820 18) Sanford Burnham Prebys Medical Discovery Institute, La Jolla, CA, USA  
1821 19) McGovern Institute for Brain Research, Massachusetts Institute of Technology, Cambridge,  
1822 Massachusetts 02139  
1823 20) Department of Brain and Cognitive Sciences, Massachusetts Institute of Technology,  
1824 Cambridge, Massachusetts 02139  
1825 21) Stanley Center for Psychiatric Research, Broad Institute of MIT and Harvard, Cambridge,  
1826 Massachusetts 02142  
1827 22) Department of Radiology, University of Pennsylvania, Philadelphia, PA 19104  
1828 23) Massachusetts Institute of Technology, Cambridge, MA  
1829 24) Dartmouth College, Hanover, NH  
1830 25) Department of Otorhinolaryngology, Anatomy and Neurobiology, University of Maryland  
1831 School of Medicine, Baltimore, MD  
1832 26) Division of Biological Science, Neurobiology Section, University of California, San Diego,  
1833 La Jolla, CA, USA  
1834 27) Department of Neurosciences, University of California, San Diego, La Jolla, CA 92093  
1835 28) SciCrunch, Inc.  
1836 29) California Institute of Technology, Pasadena, CA 91125  
1837 30) Pittsburgh Supercomputing Center, Carnegie Mellon University, 300 South Craig Street,  
1838 Pittsburgh PA 15213 USA  
1839 31) Klarman Cell Observatory and Data Sciences Platform, Broad Institute of MIT and Harvard,  
1840 Cambridge, MA 02142  
1841 32) Semel Institute & Department of Psychiatry and Biobehavioral Science, UCLA, Los  
1842 Angeles, CA 90095

## A multimodal cell census and atlas of the mammalian primary motor cortex

- 1843 33) David Geffen School of Medicine, UCLA, Los Angeles, CA 90095  
1844 34) Department of Bioengineering, University of California, San Diego, La Jolla, CA 92093  
1845 35) Institute for Ophthalmic Research, University of Tübingen, 72076, Germany  
1846 36) Center for Integrative Neuroscience, University of Tübingen, 72076, Germany  
1847 37) Institute for Bioinformatics and Medical Informatics, University of Tübingen, 72076,  
1848 Germany  
1849 38) Bernstein Center for Computational Neuroscience, University of Tübingen, 72076 Germany  
1850 39) Department of Physiology and Biophysics, University of Washington, Seattle, WA 98195  
1851 40) Division of Biological Sciences, University of California San Diego, La Jolla, CA 92093  
1852 41) Department of Cognitive Science, University of California, San Diego, La Jolla, CA 92037  
1853 42) School of Pharmaceutical Sciences, Tsinghua University, Beijing, China, 100084  
1854 43) Department of Physics, University of California, San Diego, La Jolla, CA 92037  
1855 44) Bioinformatics and Systems Biology Graduate Program, University of California San Diego,  
1856 La Jolla, CA 92093  
1857 45) Broad Institute of MIT and Harvard, Cambridge, MA 02142  
1858 46) Department of Genetics, Harvard Medical School, 77 Avenue Louis Pasteur Boston MA  
1859 02115  
1860 47) Division of Molecular Neurobiology, Department of Medical Biochemistry and Biophysics,  
1861 Karolinska Institute, S-17177 Stockholm, Sweden  
1862 48) Department of Laboratory Medicine and Pathology, University of Washington, Seattle, WA,  
1863 USA  
1864 49) Biomedical Sciences Program, School of Medicine, University of California, San Diego, La  
1865 Jolla, CA, USA  
1866 50) Howard Hughes Medical Institute, Department of Biology, MIT, Cambridge MA 02140  
1867 51) Flow Cytometry Core Facility, The Salk Institute for Biological Studies, La Jolla, CA 92037  
1868 52) Peptide Biology Laboratories, The Salk Institute for Biological Studies, La Jolla, CA 92037  
1869 53) Molecular Neurobiology Laboratory, The Salk Institute for Biological Studies, La Jolla, CA  
1870 92037  
1871 54) Stanley Institute for Cognitive Genomics, Cold Spring Harbor Laboratory, Cold Spring  
1872 Harbor, NY 11724  
1873 55) Department of Statistics and Division of Biostatistics, University of California, Berkeley,  
1874 Berkeley, CA 94720-3860  
1875 56) Department of Biomedical Informatics, Harvard Medical School, Boston, MA, USA  
1876 57) University of California San Francisco, San Francisco, California, 94143, USA  
1877 58) Department of Statistics, University of California, Berkeley, Berkeley, CA, USA  
1878 59) Department of Statistical Sciences, University of Padova, Italy  
1879 60) Division of Biostatistics, School of Public Health, University of California, Berkeley, CA,  
1880 USA  
1881 61) Department of Data Sciences, Dana-Farber Cancer Institute, Boston, MA, 02215

## A multimodal cell census and atlas of the mammalian primary motor cortex

- 1882 62) Department of Applied Mathematics, Computer Science and Statistics, Ghent University,  
1883 Ghent, Belgium
- 1884 63) Department of Computational Medicine and Bioinformatics, University of Michigan, Ann  
1885 Arbor, MI 48109
- 1886 64) Chan Zuckerberg Biohub, San Francisco, CA 94158
- 1887 65) Britton Chance Center for Biomedical Photonics, Wuhan National Laboratory for  
1888 Optoelectronics, MoE Key Laboratory for Biomedical Photonics, Huazhong University of  
1889 Science and Technology, Wuhan 430074, China
- 1890 66) Program in Neuroscience, Department of Neurobiology and Behavior, Stony Brook  
1891 University, Stony Brook, NY, 11794, USA
- 1892 67) HUST-Suzhou Institute for Brainsmatics, Suzhou 215123, China
- 1893 68) School of Biomedical Engineering, Hainan University, Haikou 570228, China
- 1894 69) SEU-ALLEN Joint Center, Institute for Brain and Intelligence, Southeast University,  
1895 Nanjing, Jiangsu, China
- 1896 70) School of Optometry and Ophthalmology, Wenzhou Medical University, Wenzhou,  
1897 Zhejiang, China
- 1898 71) Key Laboratory of Intelligent Computation & Signal Processing, Ministry of Education,  
1899 Anhui University, Hefei, Anhui, China
- 1900 72) Anhui University, Hefei, Anhui, China
- 1901 73) Shanghai University, Shanghai, China
- 1902 74) School of Computer Engineering and Science, Shanghai University, Shanghai, China
- 1903 75) Department of Pathology, University of California San Francisco, San Francisco, California,  
1904 94143, USA
- 1905 76) Department of Cell and Molecular Biology, Karolinska Institutet, Stockholm, 17177,  
1906 Sweden
- 1907 77) Washington National Primate Research Center, University of Washington, Seattle, WA  
1908 98195
- 1909 78) Jan and Dan Duan Neurological research Institute, Houston, 77030, TX, USA
- 1910 79) Department of Neurological Surgery, University of Washington School of Medicine, Seattle,  
1911 WA, USA
- 1912 80) Regional Epilepsy Center at Harborview Medical Center, Seattle, WA, USA
- 1913 81) Innovative Genomics Institute, University of California, Berkeley, CA, 94720
- 1914 82) Cancer Research Laboratory, University of California, Berkeley
- 1915 83) Department of Psychiatry, University of Maryland School of Medicine, Baltimore, MD
- 1916 84) Center for Bioinformatics and Computational Biology, University of Maryland, College  
1917 Park, College Park, MD, 20742.
- 1918 85) Department Neurology & Department Neuroscience, Johns Hopkins School of Medicine,  
1919 Baltimore, MD
- 1920 86) CatalystNeuro, LLC
- 1921 87) Kitware Inc



## A multimodal cell census and atlas of the mammalian primary motor cortex

1922 88) Data Sciences Platform, Broad Institute of MIT and Harvard, Cambridge, MA 02142

1923

1924 †Current address for I.B., H.W.D., N.N.F., L.G., H.H, B.Z.: Department of Neurobiology, David  
1925 Geffen School of Medicine at UCLA, Los Angeles, CA 90095

1926 Current address for J.A.H., K.E.H., P.R.N.: Cajal Neuroscience, 1616 Eastlake Ave E, Suite 208,  
1927 Seattle, WA 98102

1928 Current address for Z.J.H.: Department of Neurobiology, Duke University School of Medicine,  
1929 Durham, NC 27705

1930 Current address for C.L.: Department of Human Genetics, University of California, Los Angeles

1931 Current address for J.N.: National Institute of Neurological Disorders and Stroke, National  
1932 Institutes of Health, Bethesda, MD USA

1933 Current address for S.F.O.: Department of Neurosurgery, Stanford University School of  
1934 Medicine, Stanford, CA 94305

1935 Current address for A.R.: Genentech, 1 DNA Way, South San Francisco, CA

1936 Current address for X.W.: McDonnell Genome Institute, Washington University School of  
1937 Medicine, St. Louis, MO, USA

1938

### 1939 **Author contributions**

1940

1941 See the consortium author list for full details of author contributions. BICCN Contributing PIs:

1942 G.A.A., M.M.B., E.M.C., J.C., H.D., J.R.E., G.F., J.C.G., S.S.G., Y.O.H., M.H., R.H., Z.J.H.,

1943 E.S.L., B.L., M.E.M., L.N., J.N., P.O., L.P., A.J.R., T.L.T., A.S.T., O.W., X.W.Y., H.Z., K.Z.,

1944 X.Z. Principal manuscript editors: Z.J.H., E.S.L., H.Z. Manuscript writing and figure generation:

1945 G.A.A., T.E.B., P.B., E.M.C., T.L.D., H.D., J.R.E., J.A.H., M.H., Z.J.H., N.L.J., B.E.K., D.K.,

1946 E.S.L., Y.E.L., H.L., K.S.M., E.A.M., M.N., J.N., P.O., B.R., F.S., P.T., J.T.T., A.S.T., F.X.,

1947 H.Z., M.Z., Z.Z., J.Z., X.Z., B.Z. Analysis coordination: T.E.B., E.M.C., H.D., J.R.E., J.A.H.,

1948 M.H., Z.J.H., E.S.L., E.A.M., J.N., P.O., B.R., A.S.T., H.Z., X.Z. Integrated data analysis: E.A.,

1949 T.E.B., P.B., H.D., J.R.E., J.A.H., Z.J.H., N.L.J., B.E.K., D.K., E.S.L., Y.E.L., H.L., E.A.M.,

1950 P.O., B.R., F.S., P.T., A.S.T., F.X., Z.Y., H.Z., M.Z., Z.Z., J.Z., X.Z. Sc/snRNA-seq data

1951 generation and processing: D.B., T.C., J.C., K.C., N.D., D.D., S.D., W.D., E.L.D., G.F., O.F.,

1952 M.G., J.G., R.D.H., L.H., C.D.K., F.M.K., M.K., B.B.L., K.L., E.S.L., S.L., C.S.L., E.Z.M.,

1953 S.A.M., D.M., N.M.N., T.N.N., C.R.P., T.P., N.P., N.M.R., A.R., C.R., W.J.R., S.S., K.S., K.S.,

1954 J.S., B.T., M.T., A.T., H.T., C.T.V.V., C.R.V., A.M.Y., H.Z., K.Z. ATAC-seq data generation

1955 and processing: M.M.B., J.C., D.D., W.D., R.F., X.H., B.B.L., Y.E.L., C.S.L., J.D.L., J.K.O.,

1956 C.R.P., A.P., N.P., O.P., S.P., B.R., W.J.R., X.W., K.Z. Methylcytosine data production and

1957 analysis: A.I.A., A.B., M.M.B., L.B., C.O., R.G.C., H.C., J.R.E., C.F., H.L., J.D.L., C.L., J.R.N.,

1958 M.N., J.K.O., A.P., A.C.R., W.T., J.Z. Epi-Retro-Seq data generation and processing: A.B.,

1959 M.M.B., L.B., E.M.C., C.O., R.G.C., B.D., J.R.E., C.F., T.I., M.J., X.J., C.L., K.L., P.A.M.,

1960 E.A.M., J.R.N., M.N., Y.P., A.P., M.R., A.C.R., J.B.S., P.T., M.V., E.W., Z.Z., J.Z. Omics data

1961 analysis: E.A., T.E.B., T.B., A.S.B., M.C., D.D., S.D., J.R.E., R.F., S.F., O.F., J.G., J.G., Q.H.,

## A multimodal cell census and atlas of the mammalian primary motor cortex

1962 N.L.J., P.V.K., F.M.K., B.B.L., E.S.L., Y.E.L., S.L., H.L., E.Z.M., E.A.M., J.N., S.N., V.N.,  
1963 L.P., O.P., E.P., A.R., D.R., H.R.D.B., K.S., K.S., S.S., K.S., V.S., B.T., W.T., E.D.V.,  
1964 K.V.D.B., C.T.V.V., J.D.W., F.X., Z.Y., H.Z., J.Z. Tracing and connectivity data generation:  
1965 X.A., H.S.B., I.B., R.K.C., H.D., N.N.F., W.G., H.G., L.G., J.A.H., J.T.H., H.H., K.E.H., Z.J.H.,  
1966 G.K., D.J.K., A.L., X.L., B.L., Q.L., K.S.M., L.N., J.N., R.M., D.A.S., H.Z., B.Z. Morphology  
1967 data generation and reconstruction: T.L.D., H.D., Z.F., H.G., J.A.H., K.E.H., Z.J.H., X.J., S.J.,  
1968 T.J., X.K., R.L., P.L., X.L., Y.L., Y.L., L.L., Q.L., H.P., L.Q., M.R., Z.R., E.S., Y.S., W.W.,  
1969 P.W., Y.W., Y.W., L.Y., J.Y., H.Z., S.Z., X.Z. OLST/STPT and other data generation: X.A.,  
1970 W.G., J.T.H., Z.J.H., G.K., K.S.M., A.N., P.O., R.P., R.M. Morphology, connectivity and  
1971 imaging analysis: X.A., G.A.A., S.B., L.D., H.D., Z.F., N.N.F., W.G., H.G., J.A.H., J.T.H.,  
1972 Z.J.H., B.H., X.J., G.K., H.K., S.L., A.L., X.L., K.S.M., P.P.M., J.M., M.N., A.N., L.N., P.O.,  
1973 R.P., H.P., R.M., Q.W., Y.W., Y.W., P.X., F.X., Y.Y., H.Z. Spatially resolved single-cell  
1974 transcriptomics (MERFISH): H.D., S.W.E., Z.Y., H.Z., M.Z., X.Z., B.Z. Multimodal profiling  
1975 (PATCH-seq): P.B., J.B., M.B., Y.B., C.R.C., J.R.C., R.D., L.H., G.D.H., X.J., B.E.K., C.D.K.,  
1976 A.L.K., D.K., S.L., E.S.L., E.M., S.M., P.R.N., S.F.O., R.S., F.S., K.S., S.A.S., Z.H.T., J.T.T.,  
1977 A.S.T., H.Z. Transgenic tools: S.A., X.A., H.S.B., R.K.C., T.L.D., W.G., J.T.H., D.H., Z.J.H.,  
1978 G.K., D.J.K., A.Y.L., K.S.M., J.N., D.A.S., B.T., M.B.V., X.W.Y., Z.Y., H.Z. NeMO archive  
1979 and analytics: R.S.A., S.A.A., H.C.B., R.C., A.C., C.C., J.C., H.C., V.F., M.G., B.R.H., R.H.,  
1980 J.K., A.M., C.M., L.N., D.O., J.O., M.S., O.W. Brain Image Library (BIL) archive: G.H., A.J.R.  
1981 DANDI archive: B.D., S.S.G., M.G., Y.O.H., B.H. Brain Cell Data Center (BCDC): A.B., N.B.,  
1982 B.C., F.D.D., K.D., J.C.G., T.H.G., M.H., F.K., K.K., M.E.M., L.N., C.T., T.L.T. Project  
1983 management: P.B., F.D.D., H.G., H.H., K.K., D.K., B.B.L., K.S.M., S.M., M.N., F.S., S.S., C.T.  
1984

### 1985 **Competing interests**

1986  
1987 A.B. is a cofounder of SciCrunch, a company devoted to improving scientific communication.  
1988 J.R.E. is a member of Zymo Research SAB. J.A.H. is currently employed by Cajal Neuroscience.  
1989 K.E.H. is currently employed by Cajal Neuroscience. P.V.K. serves on the Scientific Advisory  
1990 Board to Celsius Therapeutics Inc. M.E.M. is a founder and CSO of SciCrunch Inc., a UCSD  
1991 tech start up that produces tools in support of reproducibility including RRIDs. P.R.N. is  
1992 currently employed by Cajal Neuroscience. A.R. is a founder and equity holder of Celsius  
1993 Therapeutics, an equity holder in Immunitas Therapeutics and until August 31, 2020 was an SAB  
1994 member of Syros Pharmaceuticals, Neogene Therapeutics, Asimov and ThermoFisher Scientific.  
1995 From August 1, 2020, A.R. is an employee of Genentech. B.R. is shareholder of Arima  
1996 Genomics, Inc. and Epigenome Technologies, Inc. K.Z. is a co-founder, equity holder and serves  
1997 on the Scientific Advisor Board of Singlera Genomics. X.Z. is a co-founder and consultant of  
1998 Vizgen.

1999

2000

2001 **REFERENCES**

## A multimodal cell census and atlas of the mammalian primary motor cortex

- 2002
- 2003 1. Waldeyer, W. Ueber einige neuere Forschungen im Gebiete der Anatomie des  
2004 Centralnervensystems I. *DMW-Deutsche Medizinische Wochenschrift* **17**, 1213–1218  
2005 (1891).
- 2006 2. Ramón y Cajal, S. *Histologie Du Système Nerveux de L'homme & Des Vertébrés*. (Maloine,  
2007 1909).
- 2008 3. Somogyi, P. & Klausberger, T. Defined types of cortical interneurone structure space and  
2009 spike timing in the hippocampus. *J. Physiol.* **562**, 9–26 (2005).
- 2010 4. Sanes, J. R. & Masland, R. H. The types of retinal ganglion cells: current status and  
2011 implications for neuronal classification. *Annu. Rev. Neurosci.* **38**, 221–246 (2015).
- 2012 5. Zeng, H. & Sanes, J. R. Neuronal cell-type classification: challenges, opportunities and the  
2013 path forward. *Nat. Rev. Neurosci.* **18**, 530–546 (2017).
- 2014 6. Huang, Z. J. & Paul, A. The diversity of GABAergic neurons and neural communication  
2015 elements. *Nat. Rev. Neurosci.* **20**, 563–572 (2019).
- 2016 7. Mukamel, E. A. & Ngai, J. Perspectives on defining cell types in the brain. *Curr. Opin.*  
2017 *Neurobiol.* **56**, 61–68 (2019).
- 2018 8. Petilla Interneuron Nomenclature Group *et al.* Petilla terminology: nomenclature of features  
2019 of GABAergic interneurons of the cerebral cortex. *Nat. Rev. Neurosci.* **9**, 557–568 (2008).
- 2020 9. Shapiro, E., Biezuner, T. & Linnarsson, S. Single-cell sequencing-based technologies will  
2021 revolutionize whole-organism science. *Nat. Rev. Genet.* **14**, 618–630 (2013).
- 2022 10. Tanay, A. & Regev, A. Scaling single-cell genomics from phenomenology to mechanism.  
2023 *Nature* **541**, 331–338 (2017).
- 2024 11. Svensson, V., Vento-Tormo, R. & Teichmann, S. A. Exponential scaling of single-cell  
2025 RNA-seq in the past decade. *Nat. Protoc.* **13**, 599–604 (2018).
- 2026 12. Svensson, V., da Veiga Beltrame, E. & Pachter, L. A curated database reveals trends in  
2027 single-cell transcriptomics. *bioRxiv* 742304 (2019).
- 2028 13. Zeisel, A. *et al.* Molecular Architecture of the Mouse Nervous System. *Cell* **174**, 999–  
2029 1014.e22 (2018).
- 2030 14. Saunders, A. *et al.* Molecular Diversity and Specializations among the Cells of the Adult  
2031 Mouse Brain. *Cell* **174**, 1015–1030.e16 (2018).
- 2032 15. Tasic, B. *et al.* Shared and distinct transcriptomic cell types across neocortical areas. *Nature*  
2033 **563**, 72–78 (2018).
- 2034 16. Harris, K. D. *et al.* Classes and continua of hippocampal CA1 inhibitory neurons revealed  
2035 by single-cell transcriptomics. *PLoS Biol.* **16**, e2006387 (2018).
- 2036 17. Romanov, R. A. *et al.* Molecular interrogation of hypothalamic organization reveals distinct  
2037 dopamine neuronal subtypes. *Nat. Neurosci.* **20**, 176–188 (2017).
- 2038 18. Hodge, R. D. *et al.* Conserved cell types with divergent features in human versus mouse  
2039 cortex. *Nature* **573**, 61–68 (2019).
- 2040 19. Kim, D.-W. *et al.* Multimodal Analysis of Cell Types in a Hypothalamic Node Controlling  
2041 Social Behavior. *Cell* **179**, 713–728.e17 (2019).

## A multimodal cell census and atlas of the mammalian primary motor cortex

- 2042 20. Luo, C. *et al.* Single-cell methylomes identify neuronal subtypes and regulatory elements in  
2043 mammalian cortex. *Science* **357**, 600–604 (2017).
- 2044 21. Preissl, S. *et al.* Single-nucleus analysis of accessible chromatin in developing mouse  
2045 forebrain reveals cell-type-specific transcriptional regulation. *Nat. Neurosci.* **21**, 432–439  
2046 (2018).
- 2047 22. Lake, B. B. *et al.* Integrative single-cell analysis of transcriptional and epigenetic states in  
2048 the human adult brain. *Nat. Biotechnol.* **36**, 70–80 (2018).
- 2049 23. Sinnamon, J. R. *et al.* The accessible chromatin landscape of the murine hippocampus at  
2050 single-cell resolution. *Genome Res.* **29**, 857–869 (2019).
- 2051 24. Lareau, C. A. *et al.* Droplet-based combinatorial indexing for massive-scale single-cell  
2052 chromatin accessibility. *Nat. Biotechnol.* **37**, 916–924 (2019).
- 2053 25. Cusanovich, D. A. *et al.* A Single-Cell Atlas of In Vivo Mammalian Chromatin  
2054 Accessibility. *Cell* **174**, 1309–1324.e18 (2018).
- 2055 26. Winnubst, J. *et al.* Reconstruction of 1,000 Projection Neurons Reveals New Cell Types  
2056 and Organization of Long-Range Connectivity in the Mouse Brain. *Cell* **179**, 268–281.e13  
2057 (2019).
- 2058 27. Gong, H. *et al.* Continuously tracing brain-wide long-distance axonal projections in mice at  
2059 a one-micron voxel resolution. *Neuroimage* **74**, 87–98 (2013).
- 2060 28. Chen, K. H., Boettiger, A. N., Moffitt, J. R., Wang, S. & Zhuang, X. RNA imaging.  
2061 Spatially resolved, highly multiplexed RNA profiling in single cells. *Science* **348**, aaa6090  
2062 (2015).
- 2063 29. Moffitt, J. R. *et al.* Molecular, spatial, and functional single-cell profiling of the  
2064 hypothalamic preoptic region. *Science* **362**, eaau 5324 (2018).
- 2065 30. Cadwell, C. R. *et al.* Electrophysiological, transcriptomic and morphologic profiling of  
2066 single neurons using Patch-seq. *Nat. Biotechnol.* **34**, 199–203 (2016).
- 2067 31. Fuzik, J. *et al.* Integration of electrophysiological recordings with single-cell RNA-seq data  
2068 identifies neuronal subtypes. *Nat. Biotechnol.* **34**, 175–183 (2016).
- 2069 32. Lein, E., Borm, L. E. & Linnarsson, S. The promise of spatial transcriptomics for  
2070 neuroscience in the era of molecular cell typing. *Science* **358**, 64–69 (2017).
- 2071 33. Huang, Z. J. & Zeng, H. Genetic approaches to neural circuits in the mouse. *Annu. Rev.*  
2072 *Neurosci.* **36**, 183–215 (2013).
- 2073 34. Graybuck, L. T. *et al.* Enhancer viruses and a transgenic platform for combinatorial cell  
2074 subclass-specific labeling. *bioRxiv* 525014 (2020).
- 2075 35. Mich, J. K. *et al.* Functional enhancer elements drive subclass-selective expression from  
2076 mouse to primate neocortex. *bioRxiv* 555318 (2020).
- 2077 36. Daigle, T. L. *et al.* A Suite of Transgenic Driver and Reporter Mouse Lines with Enhanced  
2078 Brain-Cell-Type Targeting and Functionality. *Cell* **174**, 465–480.e22 (2018).
- 2079 37. He, M. *et al.* Strategies and Tools for Combinatorial Targeting of GABAergic Neurons in  
2080 Mouse Cerebral Cortex. *Neuron* **91**, 1228–1243 (2016).
- 2081 38. Dimidschstein, J. *et al.* A viral strategy for targeting and manipulating interneurons across

## A multimodal cell census and atlas of the mammalian primary motor cortex

- 2082 vertebrate species. *Nat. Neurosci.* **19**, 1743–1749 (2016).
- 2083 39. Vormstein-Schneider, D. *et al.* Viral manipulation of functionally distinct interneurons in  
2084 mice, non-human primates and humans. *Nat. Neurosci.* (2020) doi:10.1038/s41593-020-  
2085 0692-9.
- 2086 40. Ecker, J. R. *et al.* The BRAIN Initiative Cell Census Consortium: Lessons Learned toward  
2087 Generating a Comprehensive Brain Cell Atlas. *Neuron* **96**, 542–557 (2017).
- 2088 41. Wang, Q. *et al.* The Allen Mouse Brain Common Coordinate Framework: A 3D Reference  
2089 Atlas. *Cell* **181**, 936–953.e20 (2020).
- 2090 42. Lemon, R. N. Descending pathways in motor control. *Annu. Rev. Neurosci.* **31**, 195–218  
2091 (2008).
- 2092 43. Svoboda, K. & Li, N. Neural mechanisms of movement planning: motor cortex and beyond.  
2093 *Curr. Opin. Neurobiol.* **49**, 33–41 (2018).
- 2094 44. Yao, Z. *et al.* A taxonomy of transcriptomic cell types across the isocortex and hippocampal  
2095 formation. *bioRxiv* 2020.03.30.015214 (2020).
- 2096 45. Yao, Z. *et al.* An integrated transcriptomic and epigenomic atlas of mouse primary motor  
2097 cortex cell types. *bioRxiv* 2020.02.29.970558 (2020).
- 2098 46. Kozareva, V. *et al.* A transcriptomic atlas of the mouse cerebellum reveals regional  
2099 specializations and novel cell types. *bioRxiv* 2020.03.04.976407 (2020).
- 2100 47. Krienen, F. M. *et al.* Innovations in Primate Interneuron Repertoire. *bioRxiv* 709501 (2019).
- 2101 48. Bakken, T. E. *et al.* Evolution of cellular diversity in primary motor cortex of human,  
2102 marmoset monkey, and mouse. *bioRxiv* 2020.03.31.016972 (2020).
- 2103 49. Luo, C. *et al.* Robust single-cell DNA methylome profiling with snmC-seq2. *Nat. Commun.*  
2104 **9**, 3824 (2018).
- 2105 50. Liu, H. *et al.* DNA Methylation Atlas of the Mouse Brain at Single-Cell Resolution. *bioRxiv*  
2106 2020.04.30.069377 (2020).
- 2107 51. Cusanovich, D. A. *et al.* Multiplex single cell profiling of chromatin accessibility by  
2108 combinatorial cellular indexing. *Science* **348**, 910–914 (2015).
- 2109 52. Li, Y. E. *et al.* An Atlas of Gene Regulatory Elements in Adult Mouse Cerebrum. *bioRxiv*  
2110 2020.05.10.087585 (2020).
- 2111 53. Chen, S., Lake, B. B. & Zhang, K. High-throughput sequencing of the transcriptome and  
2112 chromatin accessibility in the same cell. *Nat. Biotechnol.* **37**, 1452–1457 (2019).
- 2113 54. Zhang, M. *et al.* Molecular, spatial and projection diversity of neurons in primary motor  
2114 cortex revealed by in situ single-cell transcriptomics. *bioRxiv* 2020.06.04.105700 (2020).
- 2115 55. Fang, R. *et al.* SnapATAC: A Comprehensive Analysis Package for Single Cell ATAC-seq.  
2116 *bioRxiv* 615179 (2020).
- 2117 56. Traag, V. A., Waltman, L. & van Eck, N. J. From Louvain to Leiden: guaranteeing well-  
2118 connected communities. *Sci. Rep.* **9**, 5233 (2019).
- 2119 57. Welch, J. D. *et al.* Single-Cell Multi-omic Integration Compares and Contrasts Features of  
2120 Brain Cell Identity. *Cell* **177**, 1873–1887.e17 (2019).
- 2121 58. Haghverdi, L., Lun, A. T. L., Morgan, M. D. & Marioni, J. C. Batch effects in single-cell

## A multimodal cell census and atlas of the mammalian primary motor cortex

- 2122 RNA-sequencing data are corrected by matching mutual nearest neighbors. *Nat. Biotechnol.*  
2123 **36**, 421–427 (2018).
- 2124 59. Luo, C. *et al.* Single nucleus multi-omics links human cortical cell regulatory genome  
2125 diversity to disease risk variants. *bioRxiv* 2019.12.11.873398 (2019).
- 2126 60. Stuart, T. *et al.* Comprehensive Integration of Single-Cell Data. *Cell* **177**, 1888–1902.e21  
2127 (2019).
- 2128 61. Crow, M., Paul, A., Ballouz, S., Huang, Z. J. & Gillis, J. Characterizing the replicability of  
2129 cell types defined by single cell RNA-sequencing data using MetaNeighbor. *Nat. Commun.*  
2130 **9**, 884 (2018).
- 2131 62. Cadwell, C. R. *et al.* Multimodal profiling of single-cell morphology, electrophysiology,  
2132 and gene expression using Patch-seq. *Nat. Protoc.* **12**, 2531–2553 (2017).
- 2133 63. Gouwens, N. W. *et al.* Toward an integrated classification of neuronal cell types:  
2134 morphoelectric and transcriptomic characterization of individual GABAergic cortical  
2135 neurons. *bioRxiv* 2020.02.03.932244 (2020).
- 2136 64. Scala, F. *et al.* Phenotypic variation within and across transcriptomic cell types in mouse  
2137 motor cortex. *bioRxiv* 2020.02.03.929158 (2020).
- 2138 65. Berg, J. *et al.* Human cortical expansion involves diversification and specialization of  
2139 supragranular intratelencephalic-projecting neurons. *bioRxiv* 2020.03.31.018820 (2020).
- 2140 66. Gong, H. *et al.* High-throughput dual-colour precision imaging for brain-wide connectome  
2141 with cytoarchitectonic landmarks at the cellular level. *Nat. Commun.* **7**, 12142 (2016).
- 2142 67. Chen, X. *et al.* High-Throughput Mapping of Long-Range Neuronal Projection Using In  
2143 Situ Sequencing. *Cell* **179**, 772–786.e19 (2019).
- 2144 68. Peng, H. *et al.* Brain-wide single neuron reconstruction reveals morphological diversity in  
2145 molecularly defined striatal, thalamic, cortical and claustral neuron types. *bioRxiv* 675280  
2146 (2020).
- 2147 69. Muñoz-Castaneda, R. *et al.* Cellular Anatomy of the Mouse Primary Motor Cortex. *bioRxiv*  
2148 2020.10.02.323154 (2020).
- 2149 70. Zingg, B. *et al.* Neural networks of the mouse neocortex. *Cell* **156**, 1096–1111 (2014).
- 2150 71. Harris, J. A. *et al.* Hierarchical organization of cortical and thalamic connectivity. *Nature*  
2151 **575**, 195–202 (2019).
- 2152 72. Zingg, B. *et al.* AAV-Mediated Anterograde Transsynaptic Tagging: Mapping  
2153 Corticocollicular Input-Defined Neural Pathways for Defense Behaviors. *Neuron* **93**, 33–47  
2154 (2017).
- 2155 73. Hintiryan, H. *et al.* The mouse cortico-striatal projectome. *Nat. Neurosci.* **19**, 1100–1114  
2156 (2016).
- 2157 74. Oh, S. W. *et al.* A mesoscale connectome of the mouse brain. *Nature* **508**, 207–214 (2014).
- 2158 75. Matho, K. S. *et al.* Genetic dissection of glutamatergic neuron subpopulations and  
2159 developmental trajectories in the cerebral cortex. *bioRxiv* 2020.04.22.054064 (2020).
- 2160 76. Reardon, T. R. *et al.* Rabies Virus CVS-N2c( $\Delta$ G) Strain Enhances Retrograde Synaptic  
2161 Transfer and Neuronal Viability. *Neuron* **89**, 711–724 (2016).

## A multimodal cell census and atlas of the mammalian primary motor cortex

- 2162 77. Tervo, D. G. R. *et al.* A Designer AAV Variant Permits Efficient Retrograde Access to  
2163 Projection Neurons. *Neuron* **92**, 372–382 (2016).
- 2164 78. Wickersham, I. R. *et al.* Monosynaptic restriction of transsynaptic tracing from single,  
2165 genetically targeted neurons. *Neuron* **53**, 639–647 (2007).
- 2166 79. Zhang, Z. *et al.* Epigenomic Diversity of Cortical Projection Neurons in the Mouse Brain.  
2167 *bioRxiv* 2020.04.01.019612 (2020).
- 2168 80. Veldman, M. B. *et al.* Brainwide Genetic Sparse Cell Labeling to Illuminate the  
2169 Morphology of Neurons and Glia with Cre-Dependent MORF Mice. *Neuron* (2020)  
2170 doi:10.1016/j.neuron.2020.07.019.
- 2171 81. Harris, K. D. & Shepherd, G. M. G. The neocortical circuit: themes and variations. *Nat.*  
2172 *Neurosci.* **18**, 170–181 (2015).
- 2173 82. Molyneaux, B. J., Arlotta, P., Menezes, J. R. L. & Macklis, J. D. Neuronal subtype  
2174 specification in the cerebral cortex. *Nat. Rev. Neurosci.* **8**, 427–437 (2007).
- 2175 83. Scheibel, M. E., Davies, T. L., Lindsay, R. D. & Scheibel, A. B. Basilar dendrite bundles of  
2176 giant pyramidal cells. *Exp. Neurol.* **42**, 307–319 (1974).
- 2177 84. Kobak, D. & Berens, P. The art of using t-SNE for single-cell transcriptomics. *Nat.*  
2178 *Commun.* **10**, 5416 (2019).
- 2179 85. Mo, A. *et al.* Epigenomic Signatures of Neuronal Diversity in the Mammalian Brain.  
2180 *Neuron* **86**, 1369–1384 (2015).
- 2181 86. Economo, M. N. *et al.* Distinct descending motor cortex pathways and their roles in  
2182 movement. *Nature* **563**, 79–84 (2018).
- 2183 87. Battiste, J. *et al.* Ascl1 defines sequentially generated lineage-restricted neuronal and  
2184 oligodendrocyte precursor cells in the spinal cord. *Development* **134**, 285–293 (2007).
- 2185 88. Memic, F. *et al.* Ascl1 Is Required for the Development of Specific Neuronal Subtypes in  
2186 the Enteric Nervous System. *J. Neurosci.* **36**, 4339–4350 (2016).
- 2187 89. Bouyain, S. & Watkins, D. J. The protein tyrosine phosphatases PTPRZ and PTPRG bind to  
2188 distinct members of the contactin family of neural recognition molecules. *Proc. Natl. Acad.*  
2189 *Sci. U. S. A.* **107**, 2443–2448 (2010).
- 2190 90. Gerfen, C. R., Paletzki, R. & Heintz, N. GENSAT BAC cre-recombinase driver lines to  
2191 study the functional organization of cerebral cortical and basal ganglia circuits. *Neuron* **80**,  
2192 1368–1383 (2013).
- 2193 91. Harris, J. A. *et al.* Anatomical characterization of Cre driver mice for neural circuit mapping  
2194 and manipulation. *Front. Neural Circuits* **8**, 76 (2014).
- 2195 92. Hahn, J. D. *et al.* An open access mouse brain flatmap and upgraded rat and human brain  
2196 flatmaps based on current reference atlases. *J. Comp. Neurol.* (2020)  
2197 doi:10.1002/cne.24966.
- 2198 93. Claudi, F., Tyson, A. L. & Branco, T. Brainrender. A python based software for  
2199 visualisation of neuroanatomical and morphological data. *bioRxiv* 2020.02.23.961748  
2200 (2020).
- 2201 94. Dong, H. W. *The Allen reference atlas: A digital color brain atlas of the C57Bl/6J male*

## A multimodal cell census and atlas of the mammalian primary motor cortex

- 2202 *mouse*. (John Wiley & Sons Inc, 2008).
- 2203 95. Yamawaki, N., Borges, K., Suter, B. A., Harris, K. D. & Shepherd, G. M. G. A genuine  
2204 layer 4 in motor cortex with prototypical synaptic circuit connectivity. *Elife* **3**, e05422  
2205 (2014).
- 2206 96. Narayanan, R. T., Udvary, D. & Oberlaender, M. Cell Type-Specific Structural  
2207 Organization of the Six Layers in Rat Barrel Cortex. *Front. Neuroanat.* **11**, 91 (2017).
- 2208 97. Yin, L. *et al.* Epigenetic regulation of neuronal cell specification inferred with single cell  
2209 “Omics” data. *Comput. Struct. Biotechnol. J.* **18**, 942–952 (2020).
- 2210 98. Harrington, A. J. *et al.* MEF2C regulates cortical inhibitory and excitatory synapses and  
2211 behaviors relevant to neurodevelopmental disorders. *Elife* **5**, (2016).
- 2212 99. Regev, A. *et al.* The Human Cell Atlas. *Elife* **6**, (2017).
- 2213 100. Yuste, R. *et al.* A community-based transcriptomics classification and nomenclature of  
2214 neocortical cell types. *Nat. Neurosci.* (2020) doi:10.1038/s41593-020-0685-8.
- 2215 101. Mayer, C. *et al.* Developmental diversification of cortical inhibitory interneurons. *Nature*  
2216 **555**, 457–462 (2018).
- 2217 102. Mi, D. *et al.* Early emergence of cortical interneuron diversity in the mouse embryo.  
2218 *Science* **360**, 81–85 (2018).
- 2219 103. Ginhoux, F. & Prinz, M. Origin of microglia: current concepts and past controversies. *Cold*  
2220 *Spring Harb. Perspect. Biol.* **7**, a020537 (2015).
- 2221 104. Shepherd, G. M. *et al.* Neuron Names: A Gene- and Property-Based Name Format, With  
2222 Special Reference to Cortical Neurons. *Front. Neuroanat.* **13**, 25 (2019).
- 2223 105. Arendt, D. *et al.* The origin and evolution of cell types. *Nat. Rev. Genet.* **17**, 744–757  
2224 (2016).
- 2225 106. Wolf, F. A., Angerer, P. & Theis, F. J. SCANPY: large-scale single-cell gene expression  
2226 data analysis. *Genome Biol.* **19**, 15 (2018).
- 2227 107. Hie, B., Bryson, B. & Berger, B. Efficient integration of heterogeneous single-cell  
2228 transcriptomes using Scanorama. *Nat. Biotechnol.* **37**, 685–691 (2019).
- 2229 108. Zhang, Y. *et al.* Model-based analysis of ChIP-Seq (MACS). *Genome Biol.* **9**, R137 (2008).
- 2230 109. Corces, M. R. *et al.* The chromatin accessibility landscape of primary human cancers.  
2231 *Science* **362**, (2018).
- 2232 110. Pliner, H. A. *et al.* Cicero Predicts cis-Regulatory DNA Interactions from Single-Cell  
2233 Chromatin Accessibility Data. *Mol. Cell* **71**, 858–871.e8 (2018).
- 2234 111. Delignette-Muller, M. & Dutang, C. fitdistrplus: An R Package for Fitting Distributions.  
2235 *Journal of Statistical Software, Articles* **64**, 1–34 (2015).
- 2236 112. Hoyer, P. O. Non-negative Matrix Factorization with Sparseness Constraints. *J. Mach.*  
2237 *Learn. Res.* **5**, 1457–1469 (2004).
- 2238 113. Fornes, O. *et al.* JASPAR 2020: update of the open-access database of transcription factor  
2239 binding profiles. *Nucleic Acids Res.* **48**, D87–D92 (2020).
- 2240 114. McLeay, R. C. & Bailey, T. L. Motif Enrichment Analysis: a unified framework and an  
2241 evaluation on ChIP data. *BMC Bioinformatics* **11**, 165 (2010).



## A multimodal cell census and atlas of the mammalian primary motor cortex

- 2242 115. Saiki, A. *et al.* In Vivo Spiking Dynamics of Intra- and Extratelencephalic Projection  
2243 Neurons in Rat Motor Cortex. *Cereb. Cortex* **28**, 1024–1038 (2018).  
2244 116. Baker, A. *et al.* Specialized Subpopulations of Deep-Layer Pyramidal Neurons in the  
2245 Neocortex: Bridging Cellular Properties to Functional Consequences. *J. Neurosci.* **38**,  
2246 5441–5455 (2018).  
2247  
2248
